# Supplementary material
Source: publisher figshare collection journal article supplement (https://acs.figshare.com/ndownloader/files/4534753)

# $\beta$ , $\beta$ -Disubstituted C- and N-Vinylindoles from one-step condensations of aldehydes and indole derivatives

Gil Fridkin, Nicolas Boutard and William D. Lubell\*

*Département de chimie, Université de Montréal, C.P 6128 Succursale Centre Ville,  
Montréal, Québec, Canada H3C 3J7*

*William.lubell@umontreal.ca*

## Supporting Information

### Table of contents

|                                                    |     |
|----------------------------------------------------|-----|
| General information.....                           | S2  |
| Products characterization.....                     | S2  |
| Proton NMR spectrum for <b>1a</b> .....            | S6  |
| Carbon NMR spectrum for <b>1a</b> .....            | S7  |
| Proton NMR spectrum for <b>1b</b> .....            | S8  |
| Carbon NMR spectrum for <b>1b</b> .....            | S9  |
| Proton NMR spectrum for <b>1c</b> .....            | S10 |
| Carbon NMR spectrum for <b>1c</b> .....            | S11 |
| Proton NMR spectrum for <b>1d</b> .....            | S12 |
| Carbon NMR spectrum for <b>1d</b> .....            | S13 |
| Proton NMR spectrum for <b>1e(E)</b> .....         | S14 |
| Carbon NMR spectrum for <b>1e(E)</b> .....         | S15 |
| NOESY correlation expansion for <b>1e(E)</b> ..... | S16 |
| Proton NMR spectrum for <b>1e(Z)</b> .....         | S17 |
| Carbon NMR spectrum for <b>1e(Z)</b> .....         | S18 |
| NOESY correlation expansion for <b>1e(Z)</b> ..... | S19 |
| Proton NMR spectrum for <b>2a</b> .....            | S20 |
| Carbon NMR spectrum for <b>2a</b> .....            | S21 |
| Proton NMR spectrum for <b>2b</b> .....            | S22 |
| Carbon NMR spectrum for <b>2b</b> .....            | S23 |
| Proton NMR spectrum for <b>2c</b> .....            | S24 |
| Carbon NMR spectrum for <b>2c</b> .....            | S25 |
| NOESY correlation expansion for <b>2c(E)</b> ..... | S26 |
| NOESY correlation expansion for <b>2c(Z)</b> ..... | S27 |
| Proton NMR spectrum for <b>2d</b> .....            | S28 |
| Carbon NMR spectrum for <b>2d</b> .....            | S29 |
| Proton NMR spectrum for <b>2e</b> .....            | S30 |
| Carbon NMR spectrum for <b>2e</b> .....            | S31 |
| Proton NMR spectrum for <b>2f</b> .....            | S32 |
| Carbon NMR spectrum for <b>2f</b> .....            | S33 |
| Proton NMR spectrum for <b>2g</b> .....            | S34 |
| Carbon NMR spectrum for <b>2g</b> .....            | S35 |
| Proton NMR spectrum for <b>2h</b> .....            | S36 |
| Carbon NMR spectrum for <b>2h</b> .....            | S37 |
| Proton NMR spectrum for <b>5</b> .....             | S38 |
| Carbon NMR spectrum for <b>5</b> .....             | S39 |

|                                        |     |
|----------------------------------------|-----|
| Proton NMR spectrum for <b>6</b> ..... | S40 |
| Carbon NMR spectrum for <b>6</b> ..... | S41 |
| Proton NMR spectrum for <b>9</b> ..... | S42 |
| Carbon NMR spectrum for <b>9</b> ..... | S43 |

### General information:

Unless otherwise noted all reactions were performed under an atmosphere of dry nitrogen or argon. Anhydrous solvents (acetonitrile and toluene) were obtained by passage through solvent filtration systems. Microwave experiments were performed using a Biotage Initiator Sixty reactor, which monitors the reaction mixture temperature using an IR sensor and increases the temperature in a rate of 2-5 °C/sec. The microwave experiments were performed in sealed reaction vessels. <sup>1</sup>H NMR spectra were measured in CDCl<sub>3</sub> or DMSO-*d*<sub>6</sub> at 300 or 400 MHz and referenced to internal tetramethylsilane (0.00 ppm) or CHCl<sub>3</sub> (7.26 ppm) or to residual CHD<sub>2</sub>SOCD<sub>3</sub> (2.50 ppm), respectively. <sup>13</sup>C NMR spectra were measured in CDCl<sub>3</sub> or DMSO-*d*<sub>6</sub> at 75 or 100 MHz and referenced to 77.16 ppm or 39.52 ppm, respectively. In the case of particularly acid sensitive compounds (**1b** and **1e**) CDCl<sub>3</sub> was first filtered over anhydrous K<sub>2</sub>CO<sub>3</sub>. In the case of products **1e** and **2c** the *E* and *Z* isomers were characterized using NOESY experiments at 300, 500 or 700 MHz. Assignments of their <sup>1</sup>H and <sup>13</sup>C NMR signals were made possible using COSY, HMQC and DEPT experiments. Chromatography was performed using 230-400 mesh silica gel. In the case of particularly acid-sensitive compounds, silica gel was pre-treated with triethylamine as follows: silica was suspended in a solution of 5% triethylamine in hexanes and stirred for 30 minutes, the chromatography column was then packed and the silica rinsed with 3 column volumes of hexanes. Melting points were determined with a capillary melting point apparatus and are uncorrected. FT-IR spectra were taken using a FT-IR spectrophotometer. Accurate mass measurements (HRMS) were performed on a LC-MSD-Tof instrument using positive electrospray.

**1,3-bis(2-methylprop-1-enyl)-1H-indole (5).** A solution of indole (0.364 mmol) in neat isobutyraldehyde (17.84 mL) was placed in a 10-20 mL microwave (MW) flask and was treated with 300 mol % of TFA (0.273 mmol, 84 µL). The mixture (0.02 M) was flushed with argon, and the flask was immediately capped and heated to 140 °C using microwave irradiation for 2.5 h. The crude reaction mixture was diluted with EtOAc and was washed with a saturated solution of NaHCO<sub>3</sub>. The aqueous phase was extracted with EtOAc. The combined organic layers were washed with brine, dried over MgSO<sub>4</sub> and evaporated to dryness. Chromatography of the residue using a gradient of EtOAc in hexanes furnished bisvinylindole as a brown oil (43.4 mg, 53 %): R<sub>f</sub> 0.27 (2 % EtOAc in hexanes). IR (CHCl<sub>3</sub>) 3018, 2972, 2917, 1678, 1610, 1537, 1464, 1384, 1312, 1216 cm<sup>-1</sup>; <sup>1</sup>H NMR (400 MHz, CDCl<sub>3</sub>): δ 7.64 (d, *J* = 7.8 Hz, 1H), 7.24-7.21 (m, 2H), 7.14-7.11 (m, 1H), 7.06 (s, 1H), 6.58 (s, 1H), 6.41 (s, 1H), 1.98 (s, 3H), 1.93 (s, 3H), 1.92 (s, 3H), 1.73 (s, 3H). <sup>13</sup>C NMR (100 MHz, CDCl<sub>3</sub>): δ 136.2, 133.0, 132.0, 127.8, 126.0, 122.2, 120.0, 119.7, 119.2, 115.7, 114.1, 110.2, 27.0, 22.7, 20.5, 18.4. HRMS (*m/z*): calcd for C<sub>16</sub>H<sub>20</sub>N (M+H)<sup>+</sup>, 226.1590; found, 226.1586.

**General procedure A: preparation of C-vinylindoles.** A solution of 1-methylindole **3a** or 1-benzylindole **3b** (0.364 mmol) in acetonitrile (17.84 mL) was placed in a 10-20 mL microwave (MW) flask and was treated with aldehyde (1.092 mmol, 300 mol %) and 300 mol % of TFA (0.273 mmol, 84 µL). The mixture (0.02 M) was flushed with argon, and the flask was immediately capped and heated to 140 °C using microwave irradiation for 3 h. The crude reaction mixture was diluted with EtOAc and was washed with a saturated solution of NaHCO<sub>3</sub>. The aqueous phase was extracted with EtOAc. The combined organic layers were washed with brine, dried over MgSO<sub>4</sub> and evaporated to dryness to provide a residue that was purified by silica chromatography using a gradient of EtOAc or Et<sub>2</sub>O in hexanes.

**1-methyl-3-(2-methylprop-1-enyl)-1H-indole (1a).** The title compound was prepared from indole **3a** and isobutyraldehyde using general procedure A. Chromatography using 5 % EtOAc in hexanes furnished 3-vinylindole **1a** as a brown oil (51.4 mg, 76 %): R<sub>f</sub> 0.53 (1 % EtOAc in hexanes). IR (CHCl<sub>3</sub>) 3018, 2975, 1702, 1611, 1522, 1473, 1421, 1375, 1216 cm<sup>-1</sup>; <sup>1</sup>H NMR (400 MHz, CDCl<sub>3</sub>): δ 7.64 (d, *J* = 7.9 Hz, 1H), 7.27-7.23 (m, 2H), 7.12 (t, *J* = 7.4 Hz, 1H), 7.01 (s, 1H), 6.40 (s, 1H), 3.77 (s, 3H), 1.97 (s, 3H), 1.92 (s, 3H). <sup>13</sup>C NMR (100 MHz, CDCl<sub>3</sub>): δ 136.4, 132.3, 128.1, 126.7, 121.9, 119.3, 119.2, 115.8, 113.3, 109.1, 32.9, 27.0, 20.5. HRMS (*m/z*): calcd for C<sub>13</sub>H<sub>16</sub>N (M+H)<sup>+</sup>, 186.1277; found, 186.1271.

**1-methyl-3-(2,2-diphenylvinyl)-1H-indole (1c).** The title compound was prepared from indole **3a** and diphenylacetaldehyde using general procedure A. Chromatography using 2 % EtOAc in hexanes provided a crude product that was further purified by precipitation from hot *i*-PrOH to furnish 3-vinylindole **1c** as a yellow solid (28.3 mg, 25 %): mp 154-155 °C; R<sub>f</sub> 0.33 (1 % EtOAc in hexanes). IR (CHCl<sub>3</sub>) 3019, 2976, 1595, 1528, 1475, 1423, 1222, 1208 cm<sup>-1</sup>; <sup>1</sup>H NMR (400 MHz, CDCl<sub>3</sub>): δ 7.73 (d, *J* = 7.8 Hz, 1H), 7.46-7.38 (m, 5H), 7.33-7.29 (m, 5H), 7.24-7.21 (m, 3H), 7.17-7.13 (m, 1H), 5.98 (s, 1H), 3.53 (s, 3H). <sup>13</sup>C NMR (100 MHz, CDCl<sub>3</sub>): δ 143.1, 142.2, 137.3, 136.2, 130.2,

129.3, 128.5, 128.4, 128.35, 128.0, 127.4, 126.7, 122.1, 119.8, 118.8, 118.6, 112.6, 109.3, 33.0. HRMS ( $m/z$ ): calcd for  $C_{23}H_{20}N$  ( $M+H$ )<sup>+</sup>, 310.15903; found, 310.15901.

**1-benzyl-3-(2,2-diphenylvinyl)-1H-indole (1d).** The title compound was prepared from indole **3b** and diphenylacetaldehyde using general procedure A. Chromatography using a gradient of 1-2 % EtOAc in hexanes provided a crude product that was further purified by precipitation from hot *i*-PrOH to furnish 3-vinylindole **1d** as a yellow solid (24.8 mg, 18 %): mp 140-141 °C;  $R_f$  0.22 (2 % EtOAc in hexanes). IR (CHCl<sub>3</sub>) 3019, 2977, 1601, 1528, 1496, 1468, 1422, 1216 cm<sup>-1</sup>; <sup>1</sup>H NMR (400 MHz, CDCl<sub>3</sub>):  $\delta$  7.76-7.72 (m, 1H), 7.41-7.16 (m, 17H), 6.98-6.95 (m, 2H), 6.07 (s, 1H), 5.04 (s, 2H). <sup>13</sup>C NMR (100 MHz, CDCl<sub>3</sub>):  $\delta$  143.1, 142.1, 138.1, 137.0, 135.7, 130.2, 129.25, 129.17, 128.84, 128.81, 128.4, 127.8, 127.6, 127.4, 127.2, 126.8, 122.3, 120.0, 118.9, 118.6, 113.2, 109.9, 50.3. HRMS ( $m/z$ ): calcd for  $C_{29}H_{24}N$  ( $M+H$ )<sup>+</sup>, 386.1903; found, 386.1892.

**1-methyl-3-(2-phenylprop-1-enyl)-1H-indole (1e).** The title compound was prepared from indole **3a** and 2-phenylpropionaldehyde using general procedure A and was obtained as a mixture of *E/Z* isomers (85/15) as indicated from comparison of the methyl protons signals at 2.4 ppm (*E*) and 2.2 ppm (*Z*) at the <sup>1</sup>H NMR spectra of the crude product taken in CDCl<sub>3</sub> at 400 MHz.

In order to facilitate purification, excess 2-phenylpropionaldehyde present in the crude mixture was reduced to its corresponding alcohol as follows: the crude mixture was dissolved in EtOH (15 mL), the resulting solution cooled to -20 °C and LiBH<sub>4</sub> (1000 mol %, 80 mg) was added. The mixture was allowed to reach room temperature with stirring for 40 minutes. The mixture was then diluted with EtOAc (50 mL) and washed with water (20 mL). The aqueous phase was extracted with EtOAc (3 × 20 mL) and the combined organic phases were washed with brine (50 mL), dried over anhydrous MgSO<sub>4</sub> and evaporated to dryness. Chromatography using triethylamine pre-treated silica and 1 % Et<sub>2</sub>O in hexanes furnished 3-vinylindole **1e(Z)** (first to elute, 8 mg, 9%) and **1e(E)** (second to elute, 49 mg, 53%) as yellow oils (combined yield 62 %).

**1e(E)** was identified by the display of transfer of magnetization between the protons of the vinylic CH<sub>3</sub> (2.25 ppm) and the indolic proton at position 2 (7.45 ppm) in a NOESY correlation experiment (500 MHz, in MeCN at 5 °C, selected expansion of the correlation provided hereafter).

**1e(Z)** was identified by the display of transfer of magnetization between the vinylic proton (6.66 ppm) and the protons of the vinylic CH<sub>3</sub> (2.26 ppm) in a NOESY correlation experiment (300 MHz, in CDCl<sub>3</sub>, selected expansion of the correlation provided hereafter).

**1e(E)** :  $R_f$  0.20 (1 % EtOAc in hexanes). IR (CHCl<sub>3</sub>) 3019, 1702, 1612, 1529, 1493, 1474, 1424, 1377, 1336, 1216 cm<sup>-1</sup>; <sup>1</sup>H NMR (400 MHz, CDCl<sub>3</sub>):  $\delta$  7.82 (d,  $J$  = 7.5 Hz, 1H), 7.66-7.63 (m, 2H), 7.44 (t,  $J$  = 7.9 Hz, 2H), 7.41-7.29 (m, 3H), 7.28-7.22 (m, 2H), 7.13 (s, 1H), 3.87 (s, 3H), 2.44 (d,  $J$  = 0.9 Hz, 3H). <sup>13</sup>C NMR (75 MHz, CDCl<sub>3</sub>):  $\delta$  145.5, 137.3, 134.1, 129.2 (2C), 128.3, 127.3, 126.7, 123.0, 120.4, 120.0, 119.3, 114.2, 110.1, 33.8, 19.6. HRMS ( $m/z$ ): calcd for  $C_{18}H_{18}N$  ( $M+H$ )<sup>+</sup>, 248.1434; found, 248.1436.

**1e(Z)** :  $R_f$  0.21 (1 % EtOAc in hexanes). IR (CHCl<sub>3</sub>) 3018, 1685, 1613, 1525, 1498, 1469, 1415, 1375, 1332, 1217 cm<sup>-1</sup>; <sup>1</sup>H NMR (400 MHz, CDCl<sub>3</sub>):  $\delta$  7.62 (td,  $J$  = 7.9 Hz,  $J$  = 0.9 Hz, 1H), 7.39-7.07 (m, 8H), 6.66 (s, 1H), 6.15 (s, 1H), 3.55 (s, 3H), 2.26 (s, 3H). <sup>13</sup>C NMR (75 MHz, CDCl<sub>3</sub>):  $\delta$  144.8, 136.9, 135.4, 129.6, 128.8, 128.7, 127.7, 127.5, 122.4, 120.0, 119.6, 118.1, 112.9, 109.8, 33.5, 27.8. HRMS ( $m/z$ ): calcd for  $C_{18}H_{18}N$  ( $M+H$ )<sup>+</sup>, 248.1434; found, 248.1433.

**3-(cyclohexylmethyl)-1-methyl-1H-indole (6).** The title compound was prepared from indole **3a** and cyclohexane carboxaldehyde using general procedure A. Chromatography using 1 % EtOAc in hexanes furnished 3-alkylindole **1f** as a brown oil (17.4 mg, 21 %):  $R_f$  0.73 (1 % EtOAc in hexanes). IR (CHCl<sub>3</sub>) 3017, 2975, 2927, 1601, 1522, 1475, 1421, 1327, 1225, 1205 cm<sup>-1</sup>; <sup>1</sup>H NMR (400 MHz, CDCl<sub>3</sub>):  $\delta$  7.58 (d,  $J$  = 7.9 Hz, 1H), 7.28 (d,  $J$  = 8.3 Hz, 1H), 7.20 (t,  $J$  = 7.5 Hz, 1H), 7.08 (t,  $J$  = 7.4 Hz, 1H), 6.80 (s, 1H), 3.74 (s, 3H), 2.60 (d,  $J$  = 6.9 Hz, 1H), 1.78-1.74 (m, 2H), 1.69-1.66 (m, 2H), 1.63-1.60 (m, 3H), 1.20-1.15 (m, 2H), 0.98-0.95 (m, 2H). <sup>13</sup>C NMR (75 MHz, CDCl<sub>3</sub>):  $\delta$  137.1, 128.6, 126.9, 121.4, 119.4, 118.5, 114.1, 109.1, 39.1, 33.7, 33.2, 32.7, 26.8, 26.5. HRMS ( $m/z$ ): calcd for  $C_{16}H_{22}N$  ( $M+H$ )<sup>+</sup>, 228.1747; found, 228.1738.

**General procedure B: preparation of *N*-vinylindoles.** A solution of indole **4a-c** (0.364 mmol) in acetonitrile (17.84 mL) was placed in a 10-20 mL microwave (MW) flask, treated with aldehyde (3.64 mmol, 1000 mol %) and TFA (0.273 mmol, 84  $\mu$ L, 300 mol %) and flushed with argon. The flask was immediately capped and heated to 140 °C using microwave irradiation for 1 h. The crude reaction mixture was diluted with EtOAc and was washed with a saturated solution of NaHCO<sub>3</sub>. The aqueous phase was extracted with EtOAc. The combined organic layers were washed with brine, dried over MgSO<sub>4</sub> and evaporated to dryness to provide a residue that was purified by silica chromatography using a gradient of EtOAc in hexanes. In the case of products **2e-h** crude reaction mixtures were evaporated to dryness without extractive work-up and purified by silica chromatography.

**3-methyl-1-(2-methylprop-1-enyl)-1H-indole (2a).** The title compound was prepared from indole **4a** and isobutyraldehyde using general procedure B. Chromatography using 2-5 % EtOAc in hexanes furnished 3-vinylindole **2a**

as a brown oil (27.3 mg, 40 %):  $R_f$  0.80 (1 % EtOAc in hexanes). IR (CHCl<sub>3</sub>) 3019, 2975, 2930, 1677, 1602, 1523, 1463, 1421, 1219 cm<sup>-1</sup>; <sup>1</sup>H NMR (400 MHz, CDCl<sub>3</sub>):  $\delta$  7.55 (d,  $J$ =7.8 Hz, 1H), 7.21-7.20 (m, 2H), 7.12-7.10 (m, 1H), 6.88 (s, 1H), 6.53 (s, 1H), 2.33 (s, 3H), 1.90 (s, 3H), 1.72 (s, 3H). <sup>13</sup>C NMR (100 MHz, CDCl<sub>3</sub>):  $\delta$  136.8, 131.0, 128.4, 125.8, 121.8, 120.0, 119.2, 118.9, 111.3, 110.2, 22.7, 18.4, 9.8. HRMS ( $m/z$ ): calcd for C<sub>13</sub>H<sub>16</sub>N (M+H)<sup>+</sup>, 186.1277; found, 186.1271.

**3-methyl-1-(2,2-diphenylvinyl)-1H-indole (2b).** The title compound was prepared from indole **4a** and diphenylacetaldehyde using general procedure B. Chromatography using a gradient of petroleum ether to 1 % EtOAc in petroleum ether furnished 3-vinylindole **2b** as a beige solid (72.0 mg, 64 %): mp 129-130 °C;  $R_f$  0.71 (1 % EtOAc in hexanes). IR (CHCl<sub>3</sub>) 3018, 2976, 2923, 1629, 1522, 1459, 1421, 1354, 1223, 1207 cm<sup>-1</sup>; <sup>1</sup>H NMR (400 MHz, CDCl<sub>3</sub>):  $\delta$  7.50 (d,  $J$ =7.6 Hz, 1H), 7.42 (d,  $J$ =8.1 Hz, 1H), 7.32-7.31 (m, 9H), 7.23-7.21 (m, 3H), 7.17 (t,  $J$ = Hz, 1H), 6.39 (s, 1H), 2.12 (s, 3H). <sup>13</sup>C NMR (75 MHz, CDCl<sub>3</sub>):  $\delta$  141.8, 138.9, 137.0, 130.5, 129.4, 129.1, 128.9, 128.5, 127.9, 127.8, 127.4, 124.5, 122.6, 121.7, 120.5, 119.1, 113.4, 109.9, 9.7. HRMS ( $m/z$ ): calcd for C<sub>23</sub>H<sub>20</sub>N (M+H)<sup>+</sup>, 310.1590; found, 310.1588.

**3-methyl-1-(2-phenylprop-1-enyl)-1H-indole (2c).** The title compound was prepared from indole **4a** and 2-phenylpropionaldehyde using general procedure B and was obtained as a mixture of *E/Z* isomers (6/1) as indicated from comparison of the methyl protons signals at 2.49 ppm (*E*) and 2.25 ppm (*Z*) in the <sup>1</sup>H NMR spectrum of the crude product taken in CDCl<sub>3</sub> at 400 MHz. In order to facilitate the purification, excess 2-phenylpropionaldehyde present in the crude mixture was reduced to its corresponding alcohol as previously described for compound **1e**.

Chromatography using triethylamine pre-treated silica and 0.1% Et<sub>2</sub>O in hexanes furnished 3-vinylindole **2c** as a yellow oil (57 mg, 65 %, *E/Z* = 6:1):  $R_f$  0.48 (1 % EtOAc in hexanes). IR (CHCl<sub>3</sub>) 3019, 2925, 2859, 1643, 1462, 1389, 1357, 1316, 1216 cm<sup>-1</sup>.

**(E)-2c** was identified by the display of transfer of magnetization between the protons of the vinylic CH<sub>3</sub> (2.25 ppm) and the indolic proton at position 2 (7.16 ppm) in a NOESY correlation experiment (700 MHz, in CDCl<sub>3</sub>, selected expansion of the correlation is provided hereafter).

**(Z)-2c** was identified by the display of transfer of magnetization between the vinylic proton (6.91 ppm) and the protons of the vinylic CH<sub>3</sub> (2.26 ppm) in a NOESY correlation experiment (700 MHz, in CDCl<sub>3</sub>, selected expansion of the correlation is provided hereafter).

<sup>1</sup>H NMR (700 MHz, CDCl<sub>3</sub>, underlined data account for the minor *Z* isomer):  $\delta$  7.63 (d,  $J$ =7.8 Hz, 1H), 7.57-7.44 (m, 2H), 7.54-7.52 (m, 1/6H), 7.44 (t,  $J$ =7.6 Hz, 2H), 7.40 (d,  $J$ =7.6 Hz, 1/6H), 7.37 (tt,  $J$ =7.4 Hz,  $J$ =1.1 Hz, 1H), 7.34 (d,  $J$ =8 Hz, 1H), 7.30-7.24 (m, 1H + 4/6 H), 7.23-7.19 (m, 1H + 2/6 H), 7.18-7.16 (m, 1/6 H), 7.16 (q,  $J$ =1.3 Hz, 1H), 7.11 (q,  $J$ =1.0 Hz, 1H), 6.91 (q,  $J$ =1.4 Hz, 1/6H), 6.43 (q,  $J$ =1.0 Hz, 1/6H), 2.41 (d,  $J$ =1.0 Hz, 3H), 2.26 (d,  $J$ =1.4 Hz, 3/6H), 2.25 (d,  $J$ =1.3 Hz, 3H), 2.16 (d,  $J$ =1.0 Hz, 3/6H).

<sup>13</sup>C NMR (75 MHz, CDCl<sub>3</sub>, signals accounting for the minor *Z* isomer are written between brackets):  $\delta$  141.9 (140.6), 137.9 (137.3), 131.5 (131.5), 129.6 (129.3), 129.5 (128.8), 128.5 (128.2), (127.5) 127.0, 126.2 (125.9), 123.3 (122.9), 123.1 (121.1), 120.7 (120.6), 119.9 (119.7), 113.3 (113.1), 111.1 (110.6), (23.7) 17.5, 10.6 (10.4). HRMS ( $m/z$ ): calcd for C<sub>18</sub>H<sub>18</sub>N (M+H)<sup>+</sup>, 248.1434; found, 248.1427.

**1-(cyclohexyldenemethyl)-3-methyl-1H-indole (2d).** The title compound was prepared from indole **4a** and cyclohexane carboxaldehyde using general procedure B. Chromatography using a gradient of 1-5 % EtOAc in hexanes furnished 3-vinylindole **2d** as a brown oil (13.2 mg, 16 %):  $R_f$  0.51 (2 % EtOAc in hexanes). IR (CHCl<sub>3</sub>) 3018, 2930, 2856, 1672, 1612, 1463, 1373, 1233, 1216 cm<sup>-1</sup>; <sup>1</sup>H NMR (400 MHz, CDCl<sub>3</sub>):  $\delta$  7.55 (d,  $J$ =7.8 Hz, 1H), 7.25-7.18 (m, 2H), 7.14-7.10 (m, 1H), 6.84 (s, 1H), 6.49 (s, 1H), 2.33 (s, 3H), 2.29 (t,  $J$ =5.8 Hz, 2H), 2.18 (t,  $J$ =5.9 Hz, 2H), 1.69-1.65 (m, 2H), 1.62-1.59 (m, 2H), 1.54-1.50 (m, 2H). <sup>13</sup>C NMR (75 MHz, CDCl<sub>3</sub>):  $\delta$  138.9, 137.0, 128.5, 126.2, 121.8, 119.2, 118.9, 117.0, 111.2, 110.3, 33.6, 28.7, 28.4, 27.6, 26.6, 9.8. HRMS ( $m/z$ ): calcd for C<sub>16</sub>H<sub>20</sub>N (M+H)<sup>+</sup>, 226.1590; found, 226.1600.

**2-(1-(2-methylprop-1-enyl)-1H-indol-3-yl)acetic acid (2e).** The title compound was prepared from indole **4b** and isobutyraldehyde using general procedure B. Chromatography using a gradient of 30-50 % EtOAc in hexanes furnished 3-vinylindole **2e** as a brown oil (37.9 mg, 45 %):  $R_f$  0.28 (30 % EtOAc in hexanes). IR (KBr) 2972, 2915, 2606, 1717, 1613, 1557, 1464, 1378, 1313, 1238 cm<sup>-1</sup>; <sup>1</sup>H NMR (300 MHz, DMSO-*d*<sub>6</sub>):  $\delta$  7.53 (d,  $J$ =7.7 Hz, 1H), 7.27 (d,  $J$ =8.4 Hz, 1H), 7.26 (s, 1H), 7.16 (t,  $J$ =7.1 Hz, 1H), 7.08 (t,  $J$ =7.0 Hz, 1H), 6.71 (s, 1H), 3.68 (s, 2H), 1.90 (s, 3H), 1.69 (s, 3H). <sup>13</sup>C NMR (75 MHz, DMSO-*d*<sub>6</sub>):  $\delta$  172.9, 136.1, 130.0, 127.3, 127.1, 121.8, 119.5, 119.3, 119.0, 110.2, 108.8, 30.8, 22.3, 18.1. HRMS ( $m/z$ ): calcd for C<sub>14</sub>H<sub>16</sub>NO<sub>2</sub> (M+H)<sup>+</sup>, 230.1176; found, 230.1159.

**2-(5-methoxy-1-(2-methylprop-1-enyl)-1H-indol-3-yl)acetic acid (2g).** The title compound was prepared from indole **4c** and isobutyraldehyde using general procedure B. Chromatography using 50 % EtOAc in hexanes furnished 3-vinylindole **2g** as a brown oil (29.2 mg, 31 %):  $R_f$  0.19 (30 % EtOAc in hexanes). IR (KBr) 2971, 2941, 2592, 1716,



1620, 1581, 1485, 1456, 1388, 1226  $\text{cm}^{-1}$ ;  $^1\text{H}$  NMR (400 MHz,  $\text{DMSO-}d_6$ ):  $\delta$  12.23 (br s, 1H), 7.21 (s, 1H), 7.17 (d,  $J$  = 8.8 Hz, 1H), 7.03 (d,  $J$  = 2.1 Hz, 1H), 6.80 (dd,  $J$  = 8.8 Hz, 2.2 Hz, 1H), 6.67 (s, 1H), 3.76 (s, 3H), 3.64 (s, 2H), 1.88 (s, 3H), 1.68 (s, 3H).  $^{13}\text{C}$  NMR (75 MHz,  $\text{DMSO-}d_6$ ):  $\delta$  173.0, 153.8, 131.3, 129.3, 127.7, 127.6, 119.6, 111.5, 111.0, 108.4, 101.1, 55.4, 30.7, 22.3, 18.1. HRMS ( $m/z$ ): calcd for  $\text{C}_{15}\text{H}_{18}\text{NO}_3$  ( $\text{M}+\text{H}$ ) $^+$ , 260.1281; found, 260.1282.

**2-(5-methoxy-1-(2,2-diphenylvinyl)-1H-indol-3-yl)acetic acid (2h).** The title compound was prepared from indole **4c** and diphenylacetaldehyde using general procedure B. Chromatography using a gradient of 20-50 % EtOAc in hexanes furnished 3-vinylindole **2h** as a beige solid (133.4 mg, 96 %): mp 105-106  $^\circ\text{C}$ ;  $R_f$  0.19 (30 % EtOAc in hexanes). IR (KBr) 2994, 2496, 1715, 1625, 1594, 1483, 1454, 1397, 1248, 1226  $\text{cm}^{-1}$ ;  $^1\text{H}$  NMR (400 MHz,  $\text{DMSO-}d_6$ ):  $\delta$  12.23 (br s, 1H), 7.56 (d,  $J$  = 8.9 Hz, 1H), 7.55 (s, 1H), 7.39-7.30 (m, 8H), 7.15 (d,  $J$  = 1.9 Hz, 1H), 7.13 (d,  $J$  = 1.4 Hz, 1H), 7.00 (d,  $J$  = 2.3 Hz, 1H), 6.83 (dd,  $J$  = 8.9 Hz, 2.4 Hz, 1H), 6.53 (s, 1H), 3.76 (s, 3H), 3.43 (s, 2H).  $^{13}\text{C}$  NMR (100 MHz,  $\text{CDCl}_3$ ):  $\delta$  172.4, 154.5, 140.8, 138.4, 131.4, 129.8, 129.0, 128.9, 128.5, 128.2, 127.9, 127.33, 127.3, 125.8, 121.7, 111.8, 111.4, 110.5, 101.4, 55.4, 30.6. HRMS ( $m/z$ ): calcd for  $\text{C}_{25}\text{H}_{22}\text{NO}_3$  ( $\text{M}+\text{H}$ ) $^+$ , 384.1594; found, 384.1588.

**1-methyl-3-(2-methyl-1-(1-methyl-1H-indol-3-yl)propyl)-1H-indole (9).** A solution of 1-methylindole **3a** (0.454 mmol) in neat isobutyraldehyde (4.48 mL) was placed in a 2-5 mL microwave (MW) flask and treated with 10 mol % of TFA (0.045 mmol, 3.5  $\mu\text{L}$ ). The mixture (0.1 M) was flushed with argon. The flask was immediately capped and heated to 140  $^\circ\text{C}$  using microwave irradiation for 10 minutes. The crude reaction mixture was diluted with EtOAc and washed with a saturated solution of  $\text{NaHCO}_3$ . The aqueous phase was extracted with EtOAc. The combined organic layers were washed with brine, dried over  $\text{MgSO}_4$  and evaporated to dryness. Chromatography of the residue using a gradient of EtOAc in hexanes furnished bisindolylalkane as a brown oil (51.7 mg, 72 %):  $R_f$  0.24 (2 % EtOAc in hexanes). IR ( $\text{CHCl}_3$ ) 3019, 2974, 1705, 1613, 1523, 1471, 1423, 1373, 1327, 1215  $\text{cm}^{-1}$ ;  $^1\text{H}$  NMR (400 MHz,  $\text{CDCl}_3$ ):  $\delta$  7.65 (d,  $J$  = 7.9 Hz, 2H), 7.23-7.13 (m, 4H), 7.03 (t,  $J$  = 7.4 Hz, 2H), 6.92 (s, 2H), 4.22 (d,  $J$  = 8.5 Hz, 2H), 3.66 (s, 6H), 2.61-2.59 (m, 1H), 1.00 (d,  $J$  = 6.6 Hz, 6H).  $^{13}\text{C}$  NMR (100 MHz,  $\text{CDCl}_3$ ):  $\delta$  137.0, 128.3, 126.5, 121.2, 119.9, 118.6, 118.5, 109.1, 41.1, 33.4, 32.8, 22.1. HRMS ( $m/z$ ): calcd for  $\text{C}_{22}\text{H}_{25}\text{N}_2$  ( $\text{M}+\text{H}$ ) $^+$ , 317.2012; found, 317.2008.

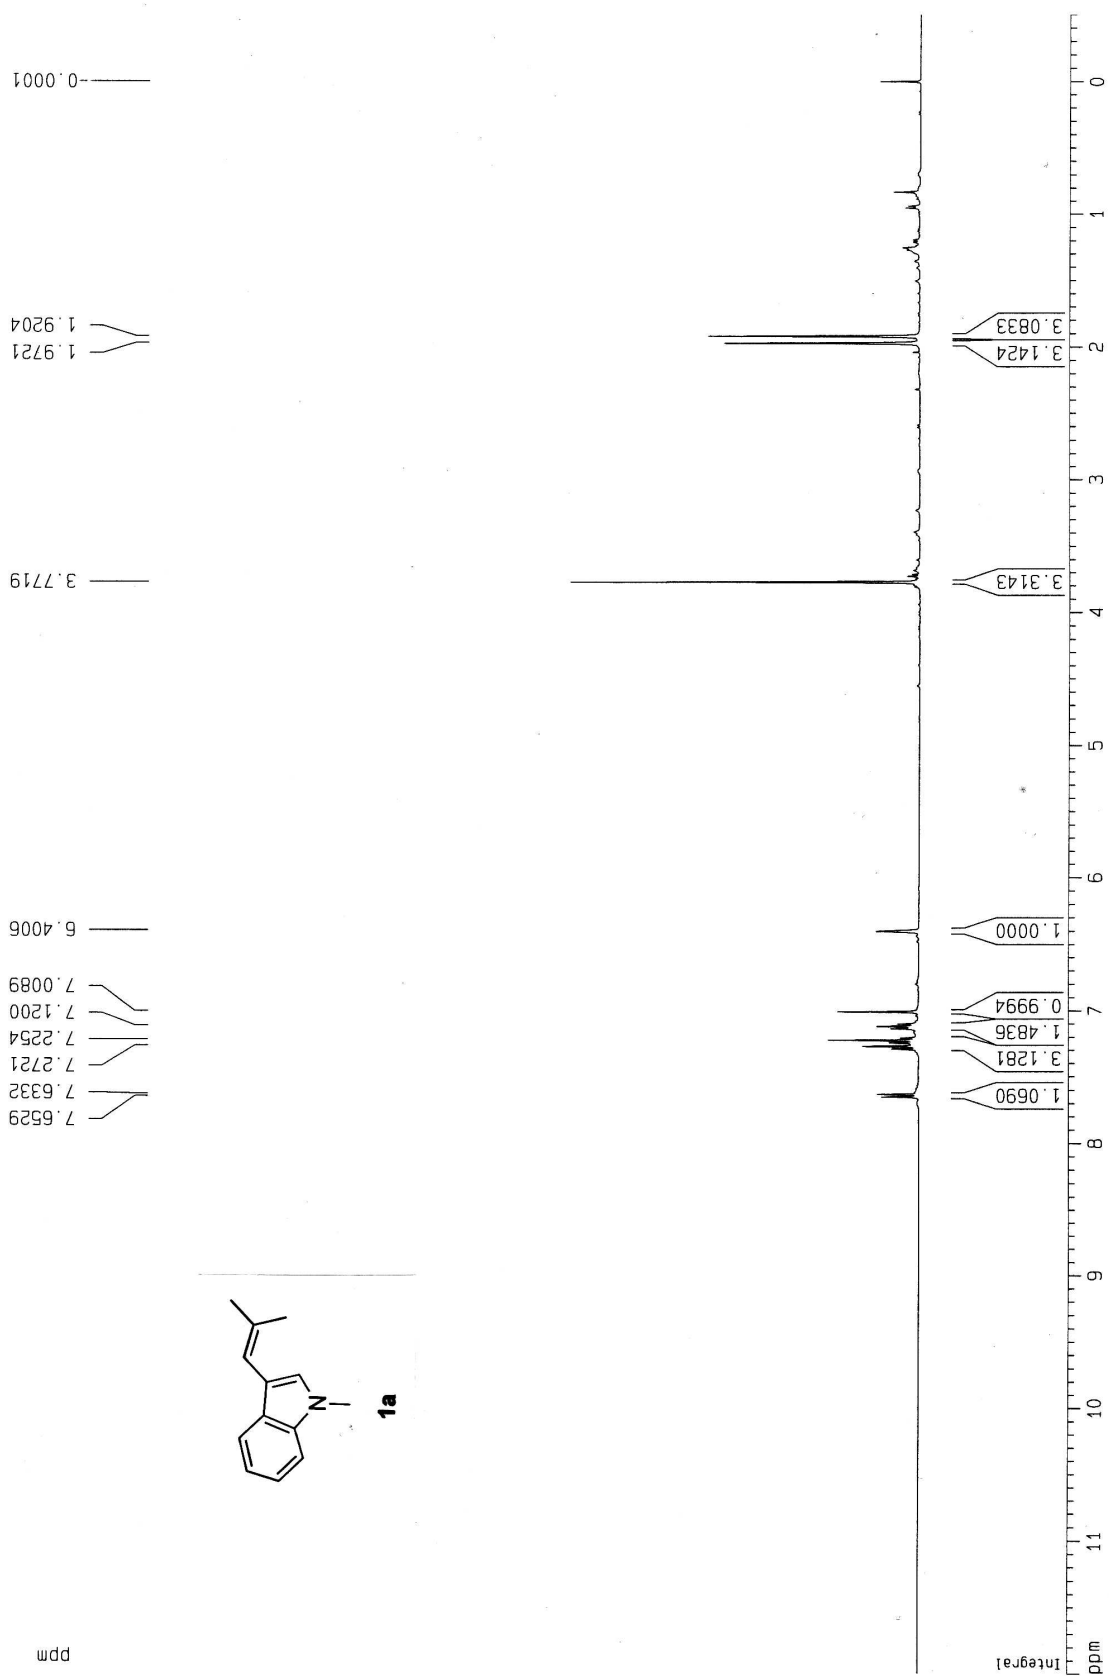CDCl<sub>3</sub>, 400MHz

**CDCl<sub>3</sub>, 100MHz**

ppm

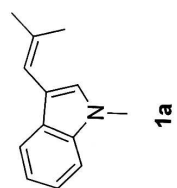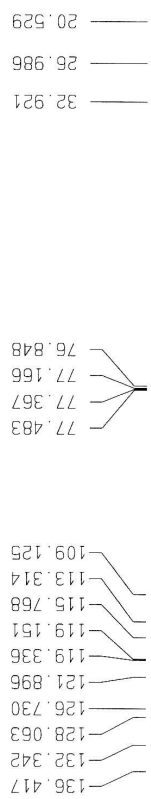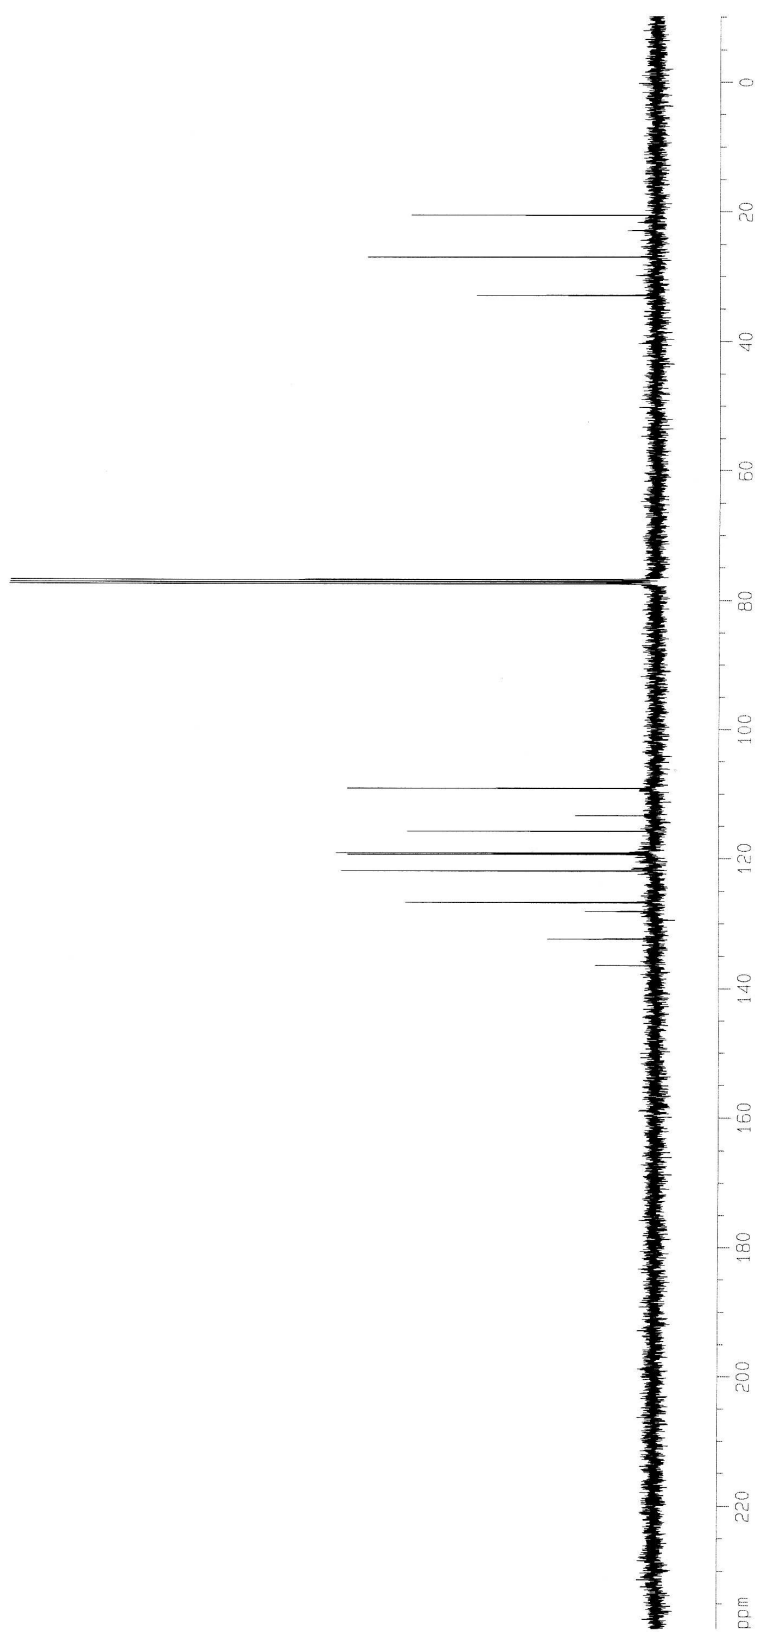

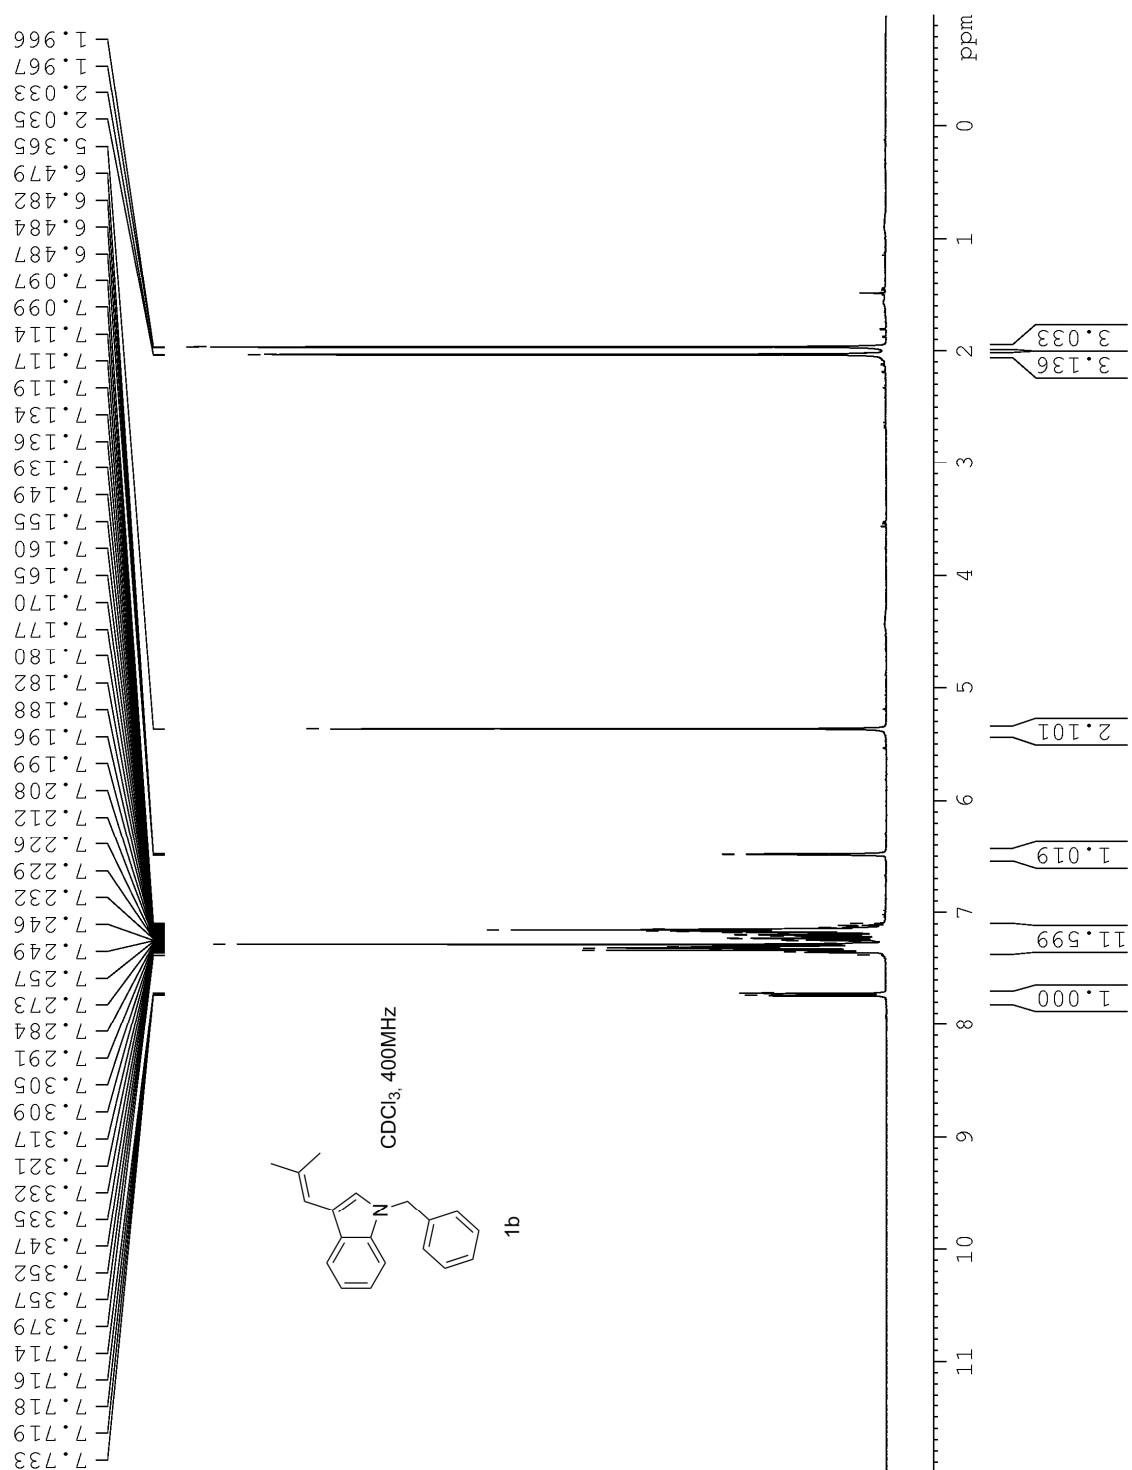

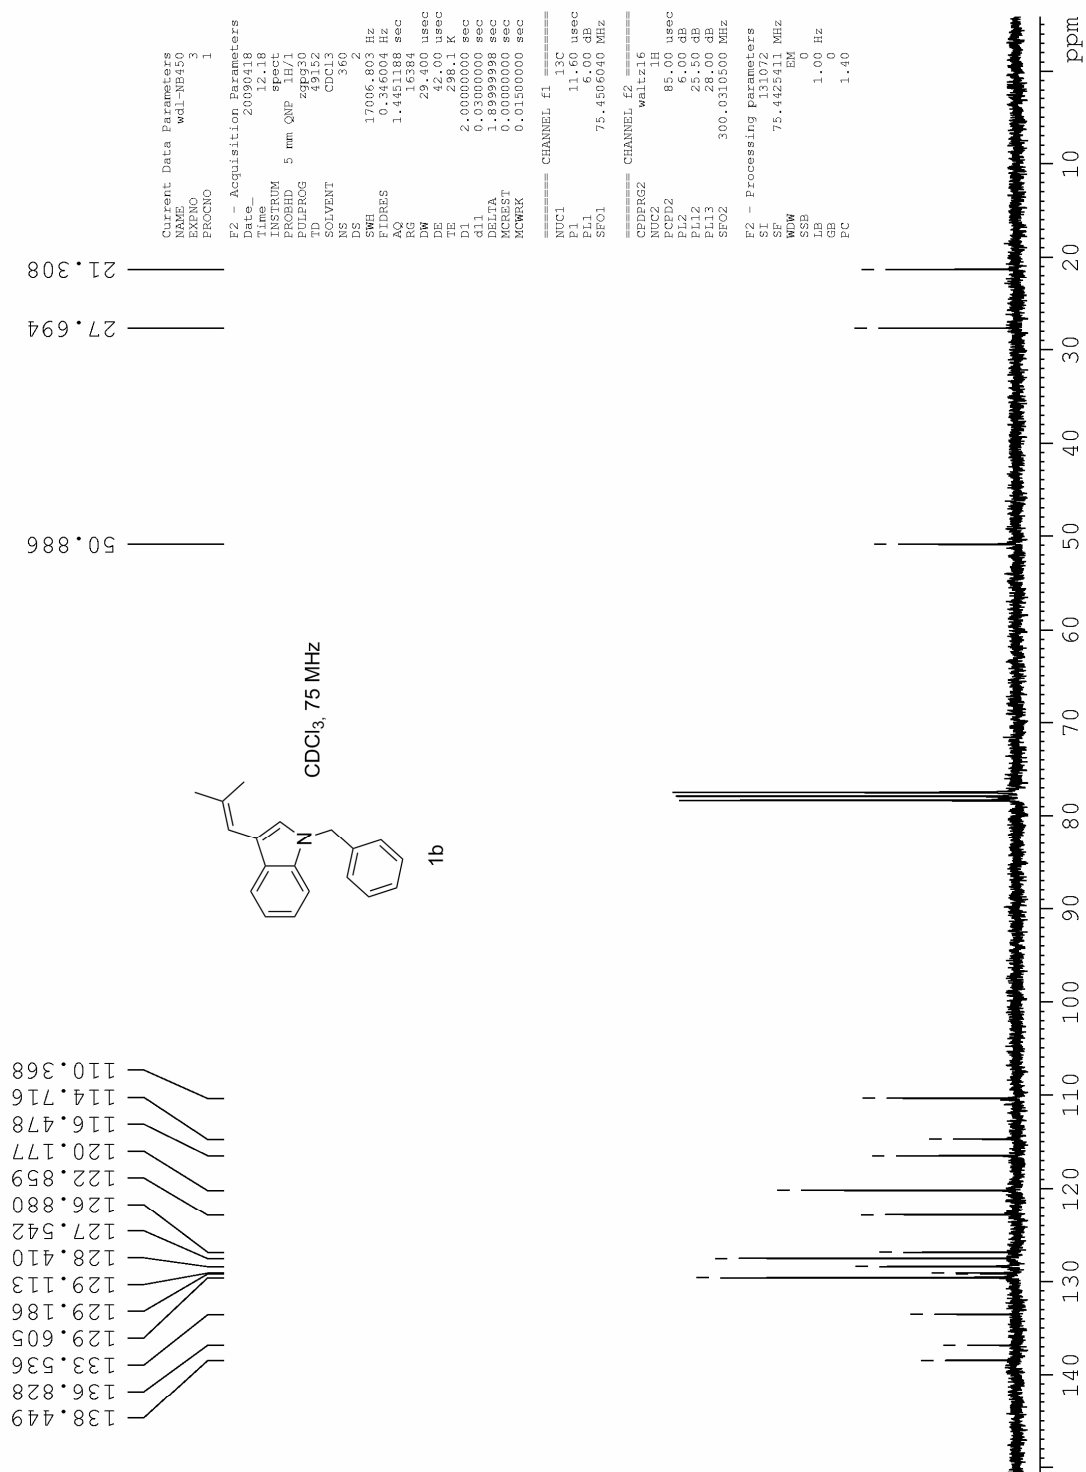

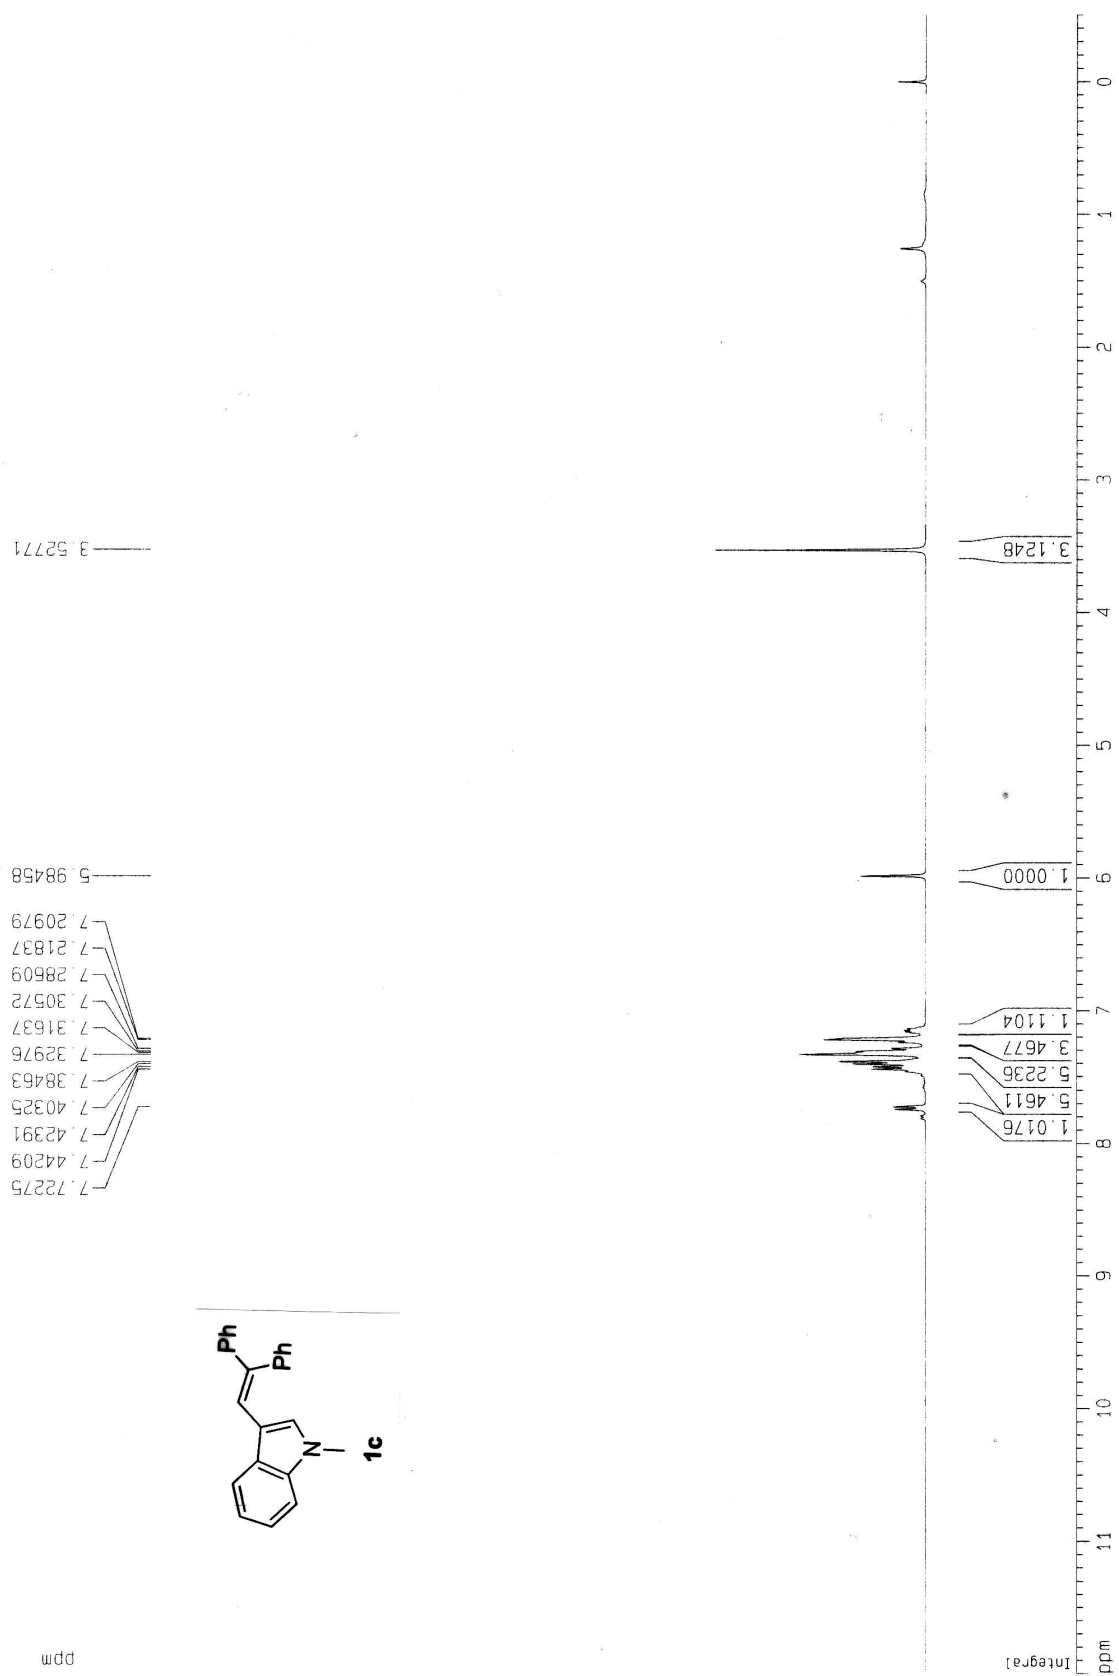

CDCl<sub>3</sub>, 400MHz

CDCl<sub>3</sub>, 100MHz

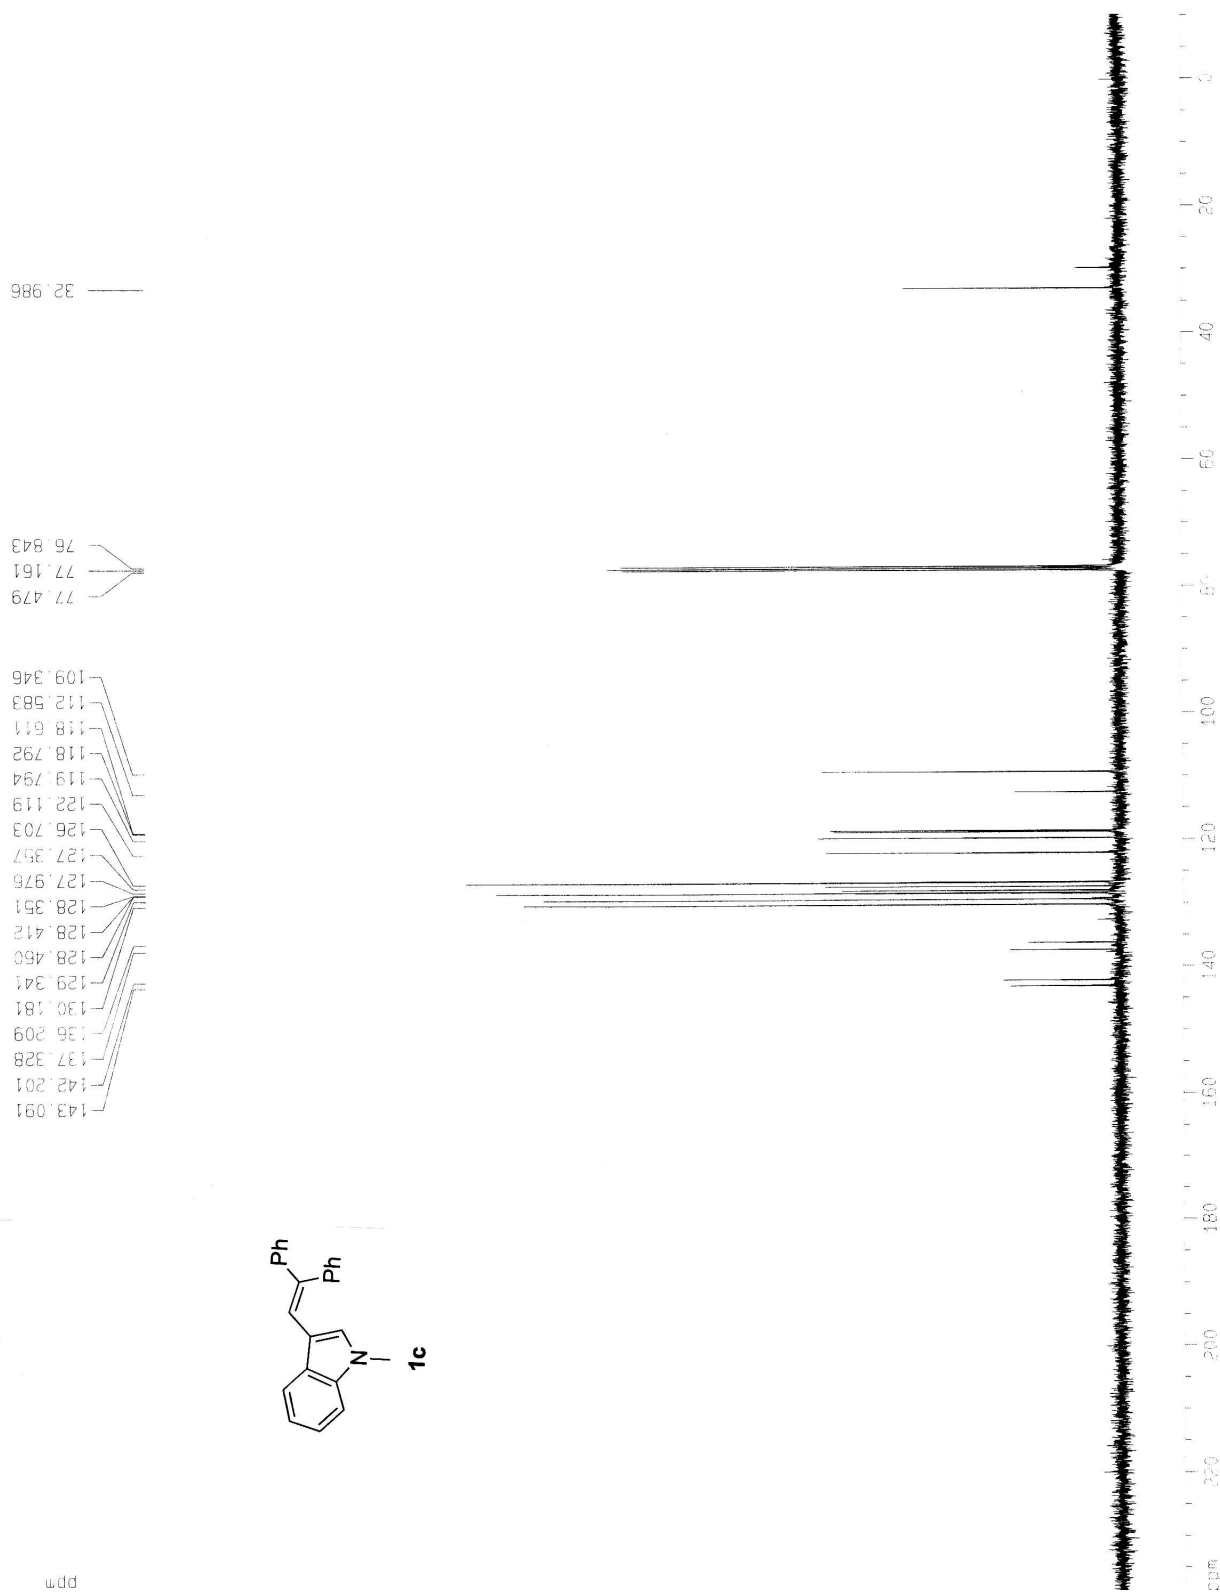

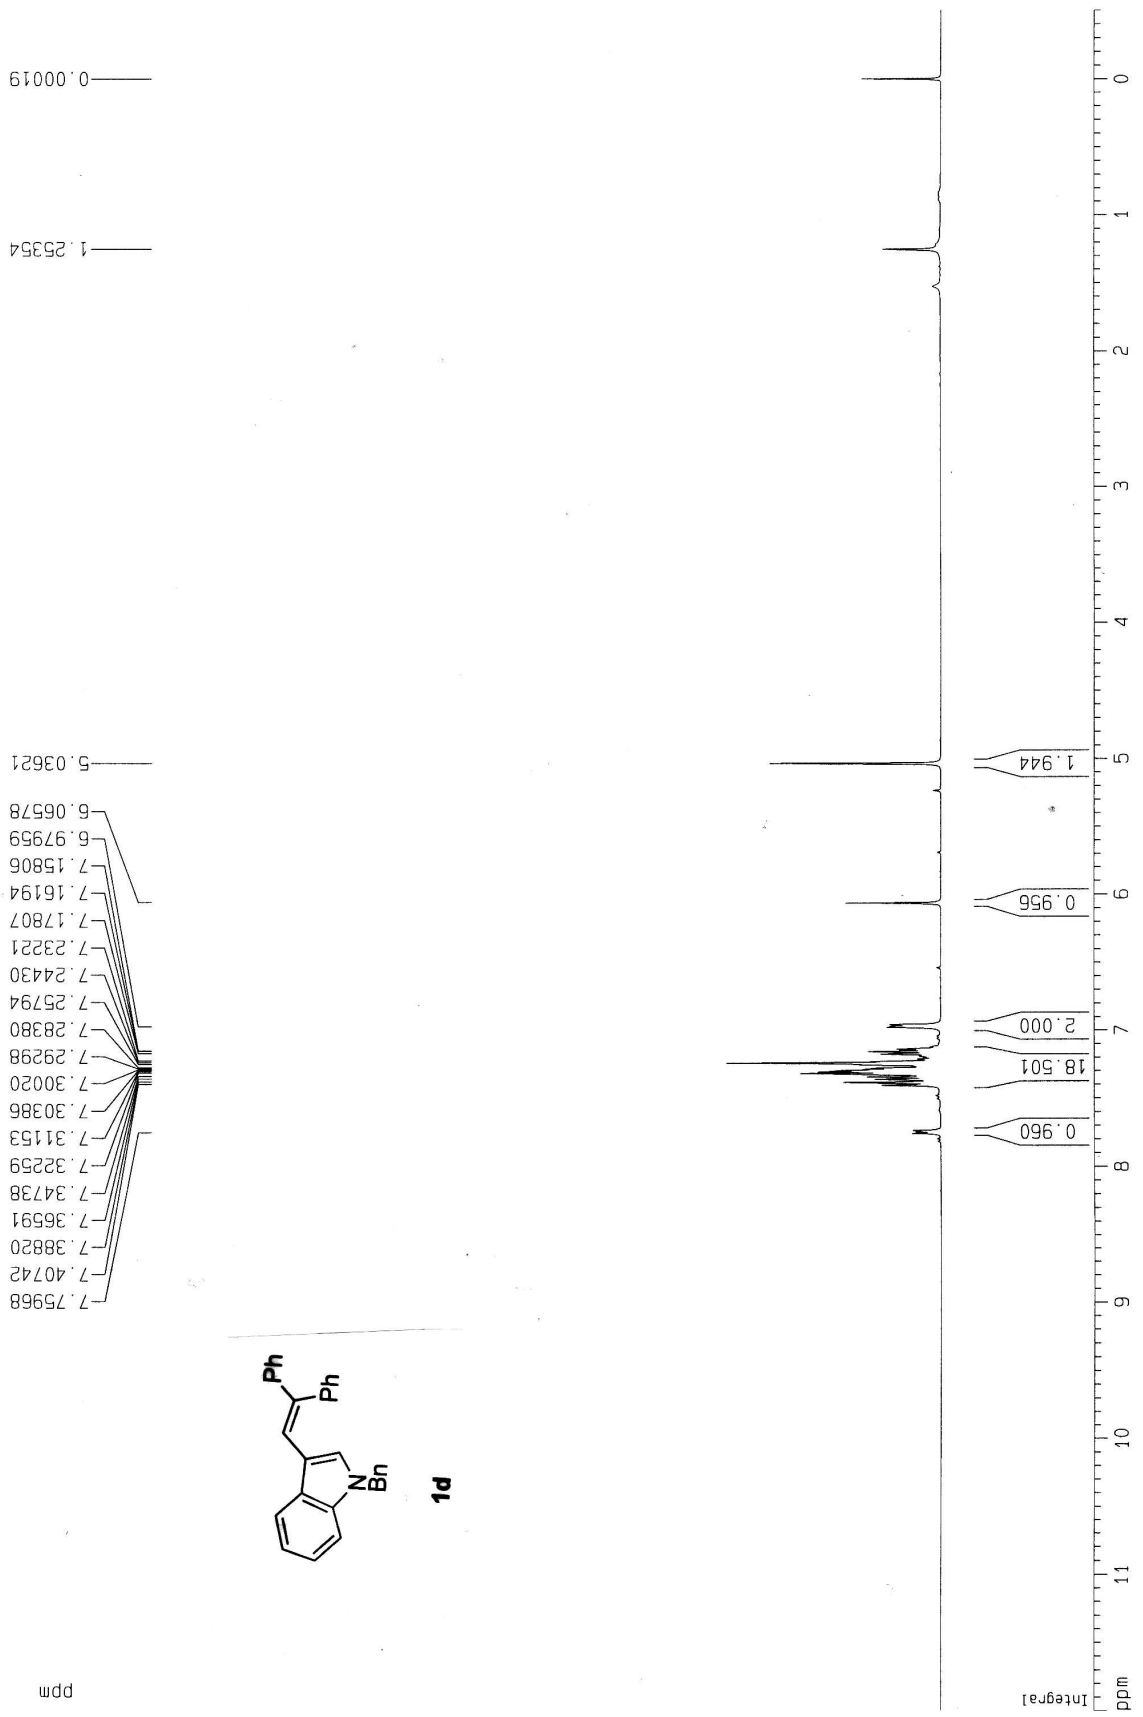



CDCl<sub>3</sub>, 75MHz

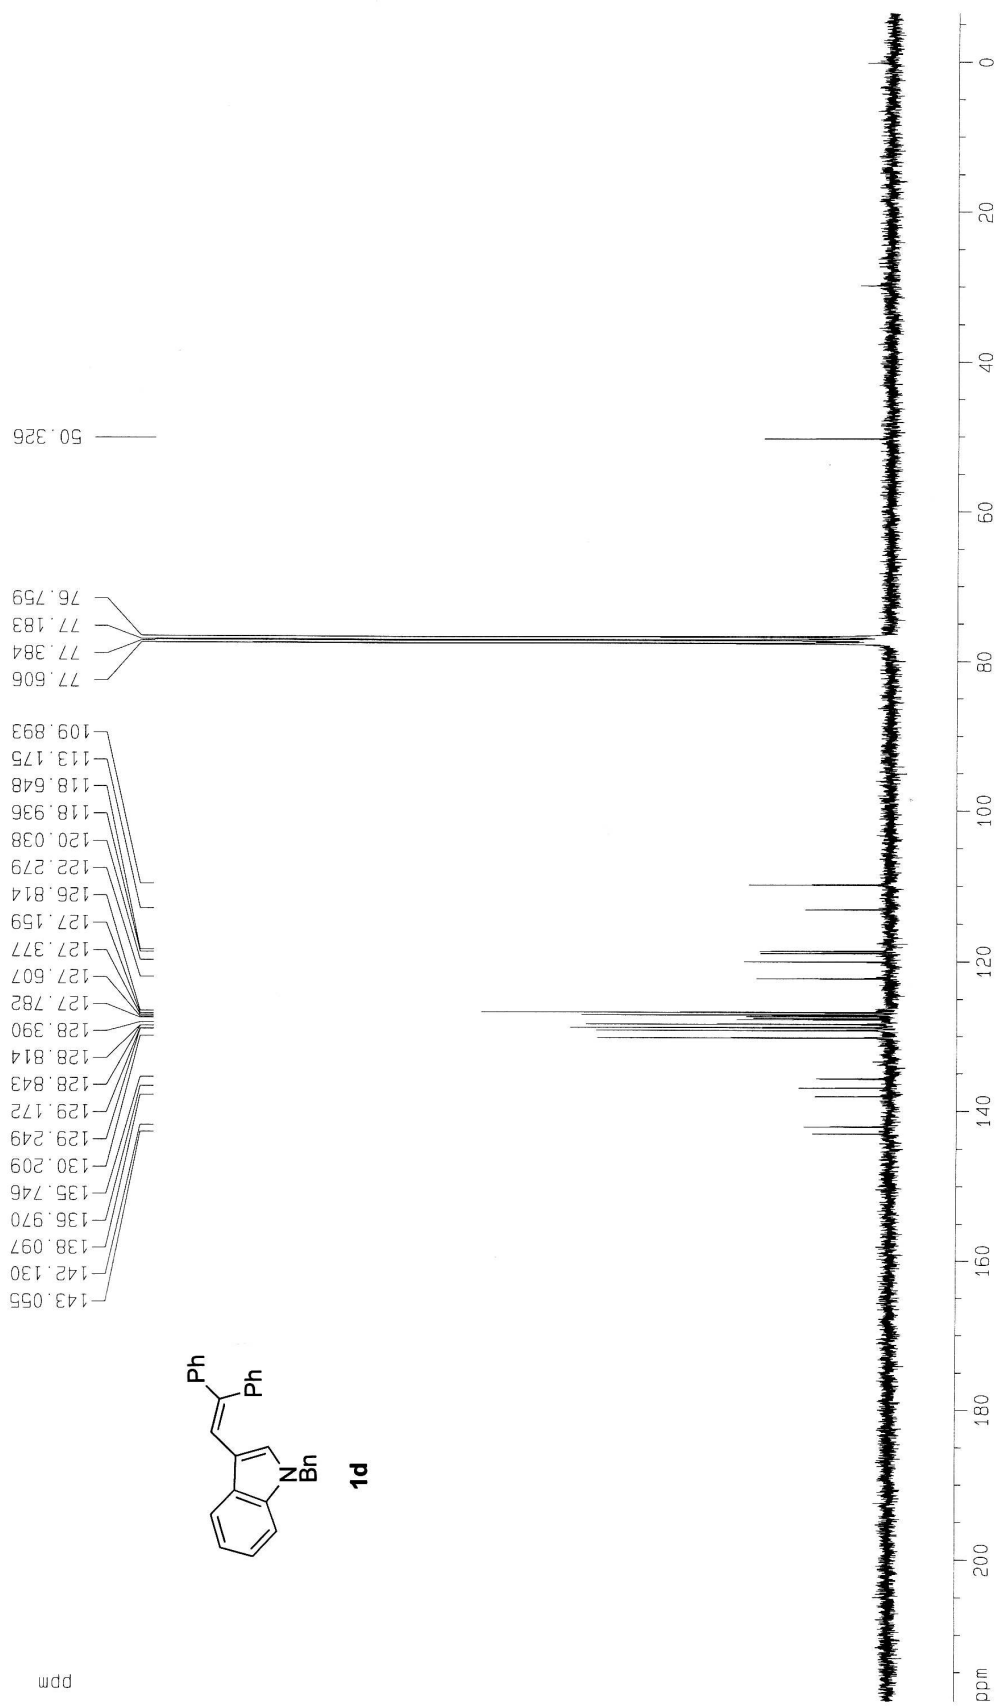

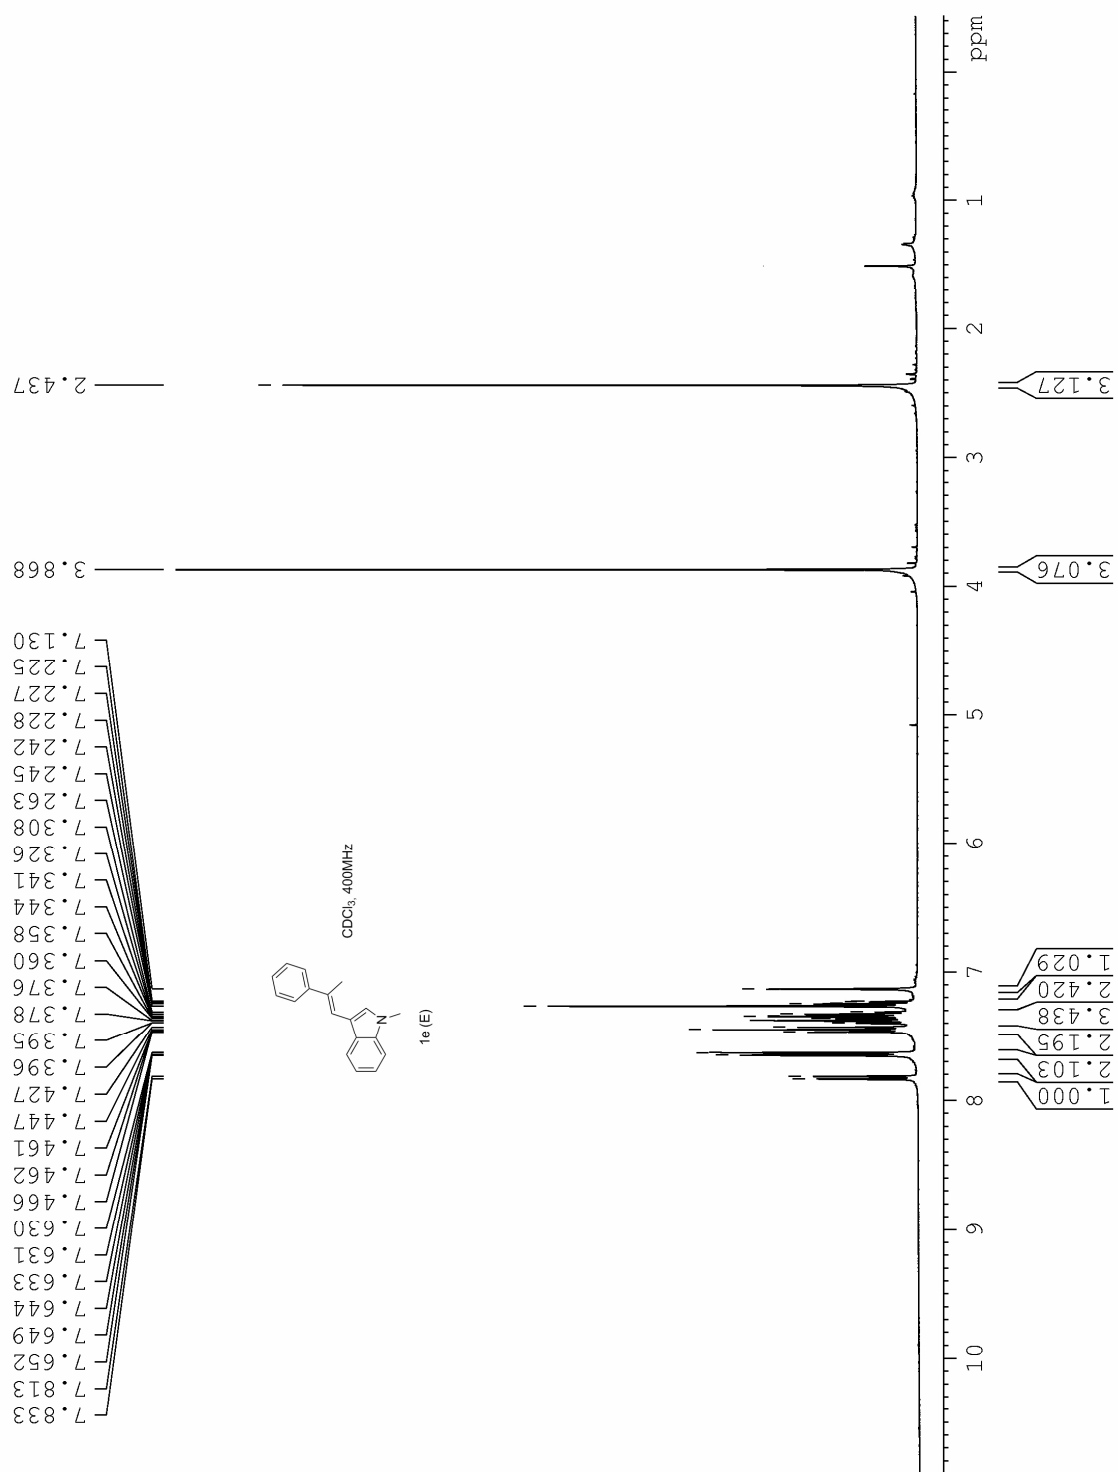

NB457 p2 CDCl3 300MHz

145.539  
137.295  
134.138  
129.197  
128.287  
127.331  
126.745  
123.050  
120.379  
120.031  
119.292  
114.209  
110.083

33.812  
19.569

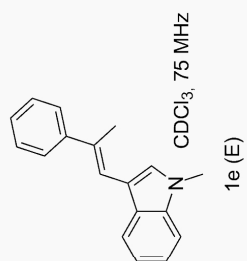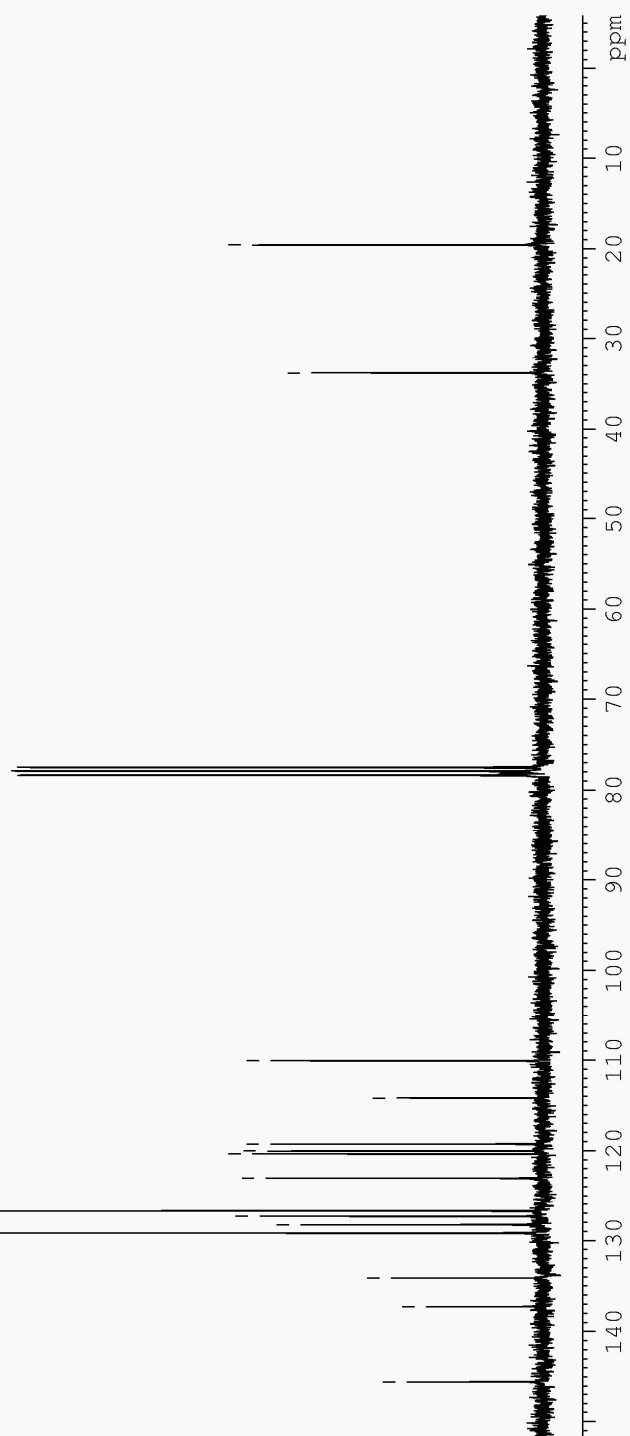

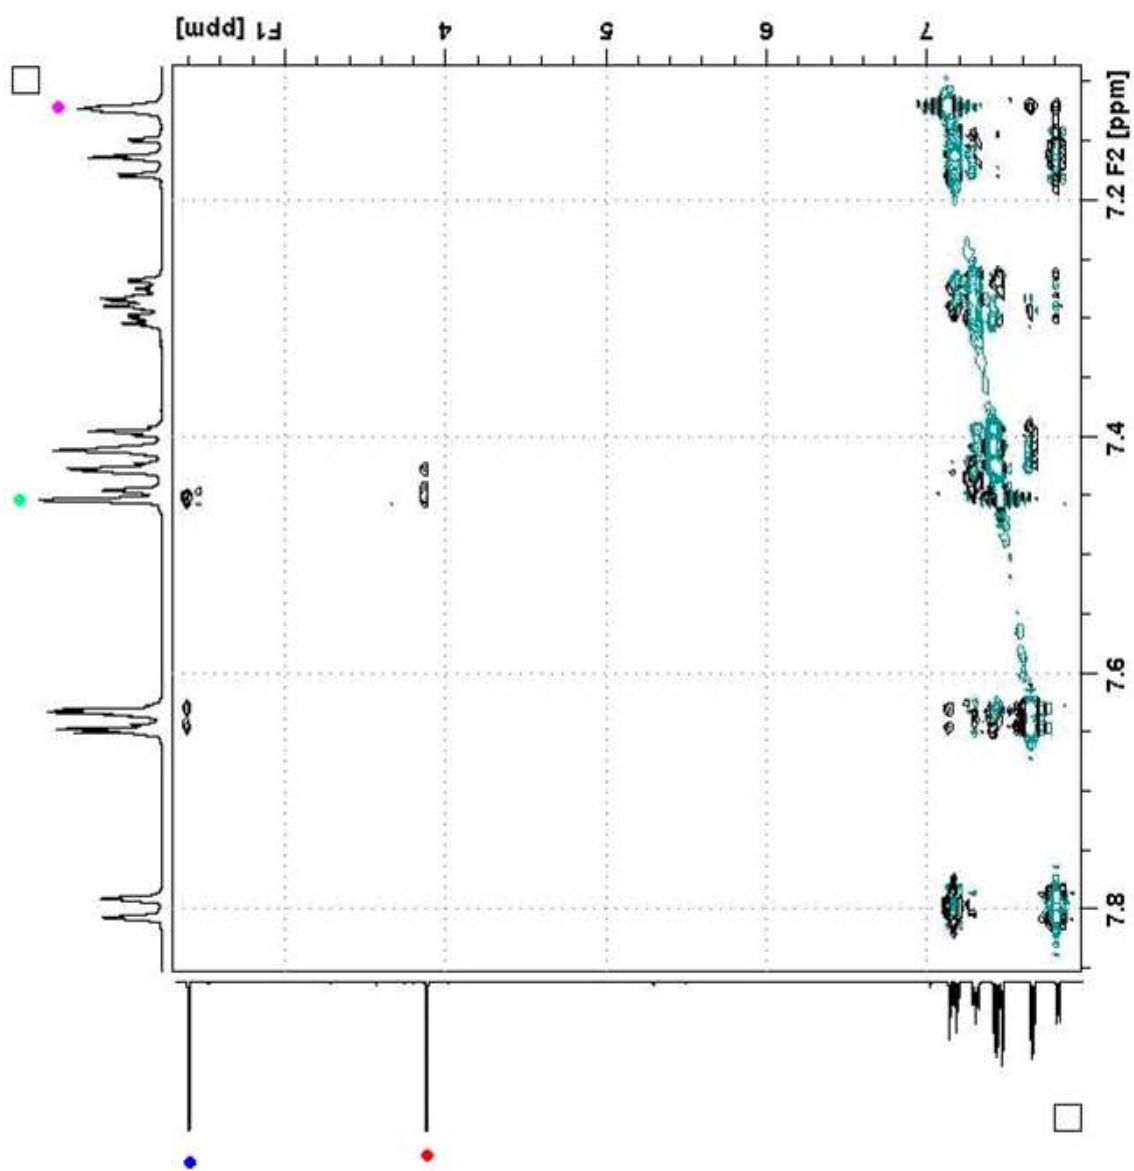

NOESY 500 MHz, MeCN, 5°C

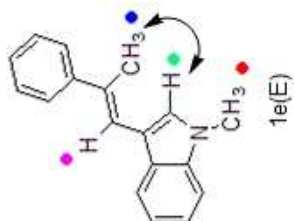

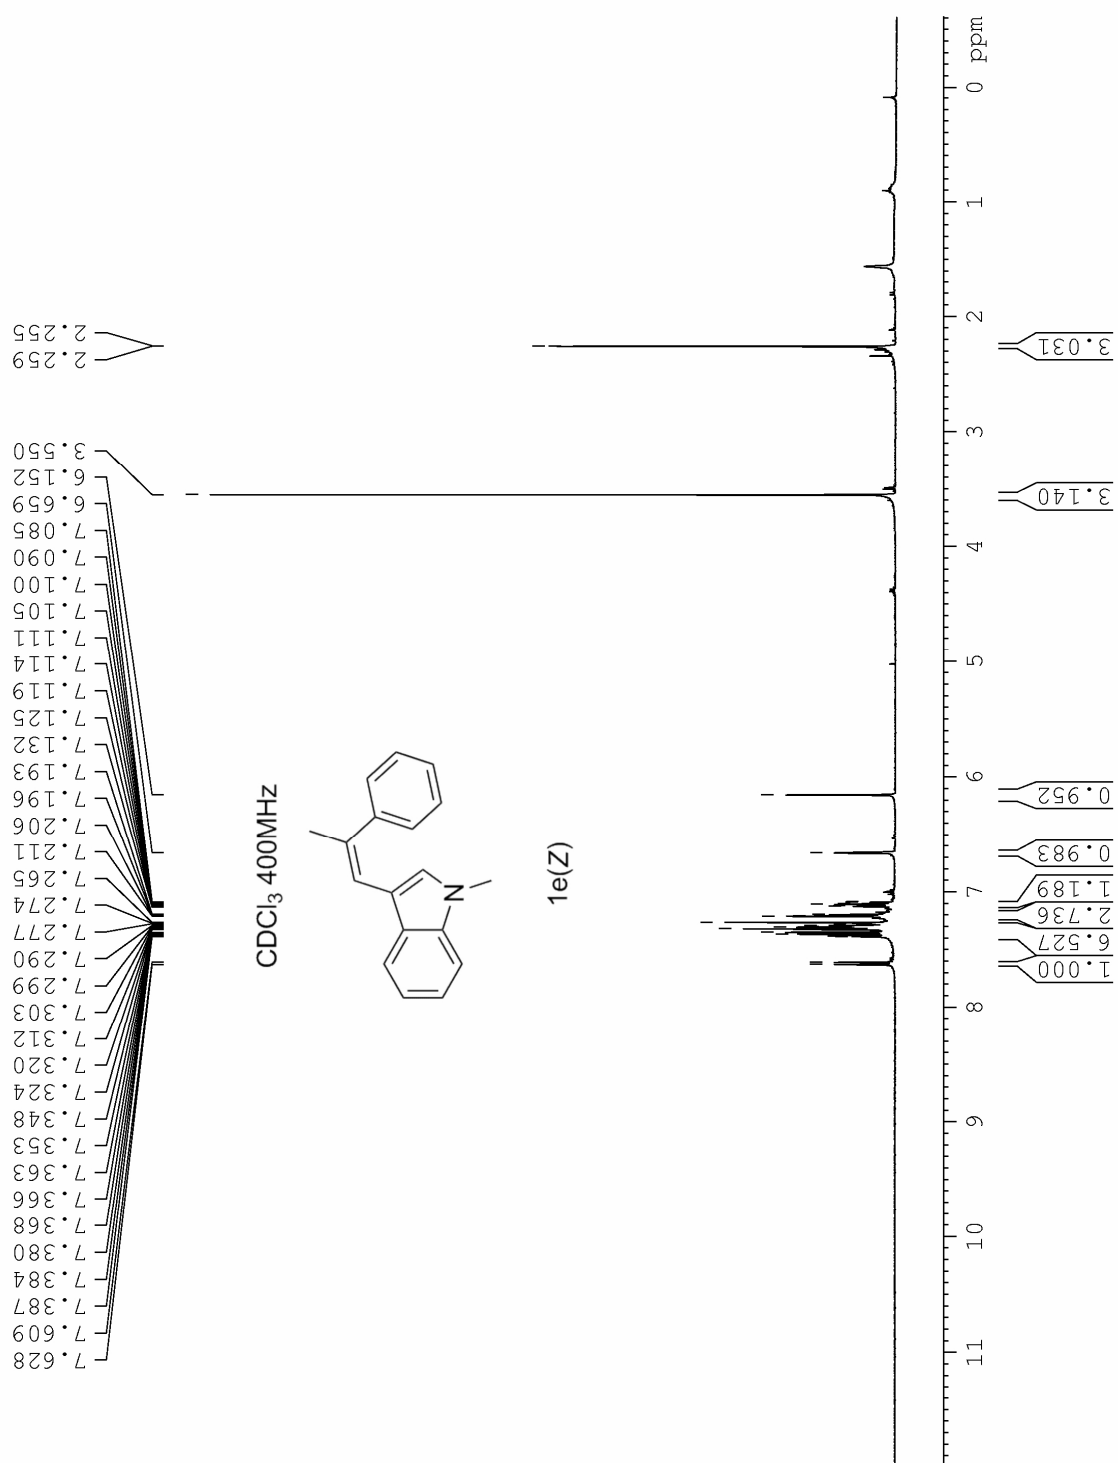

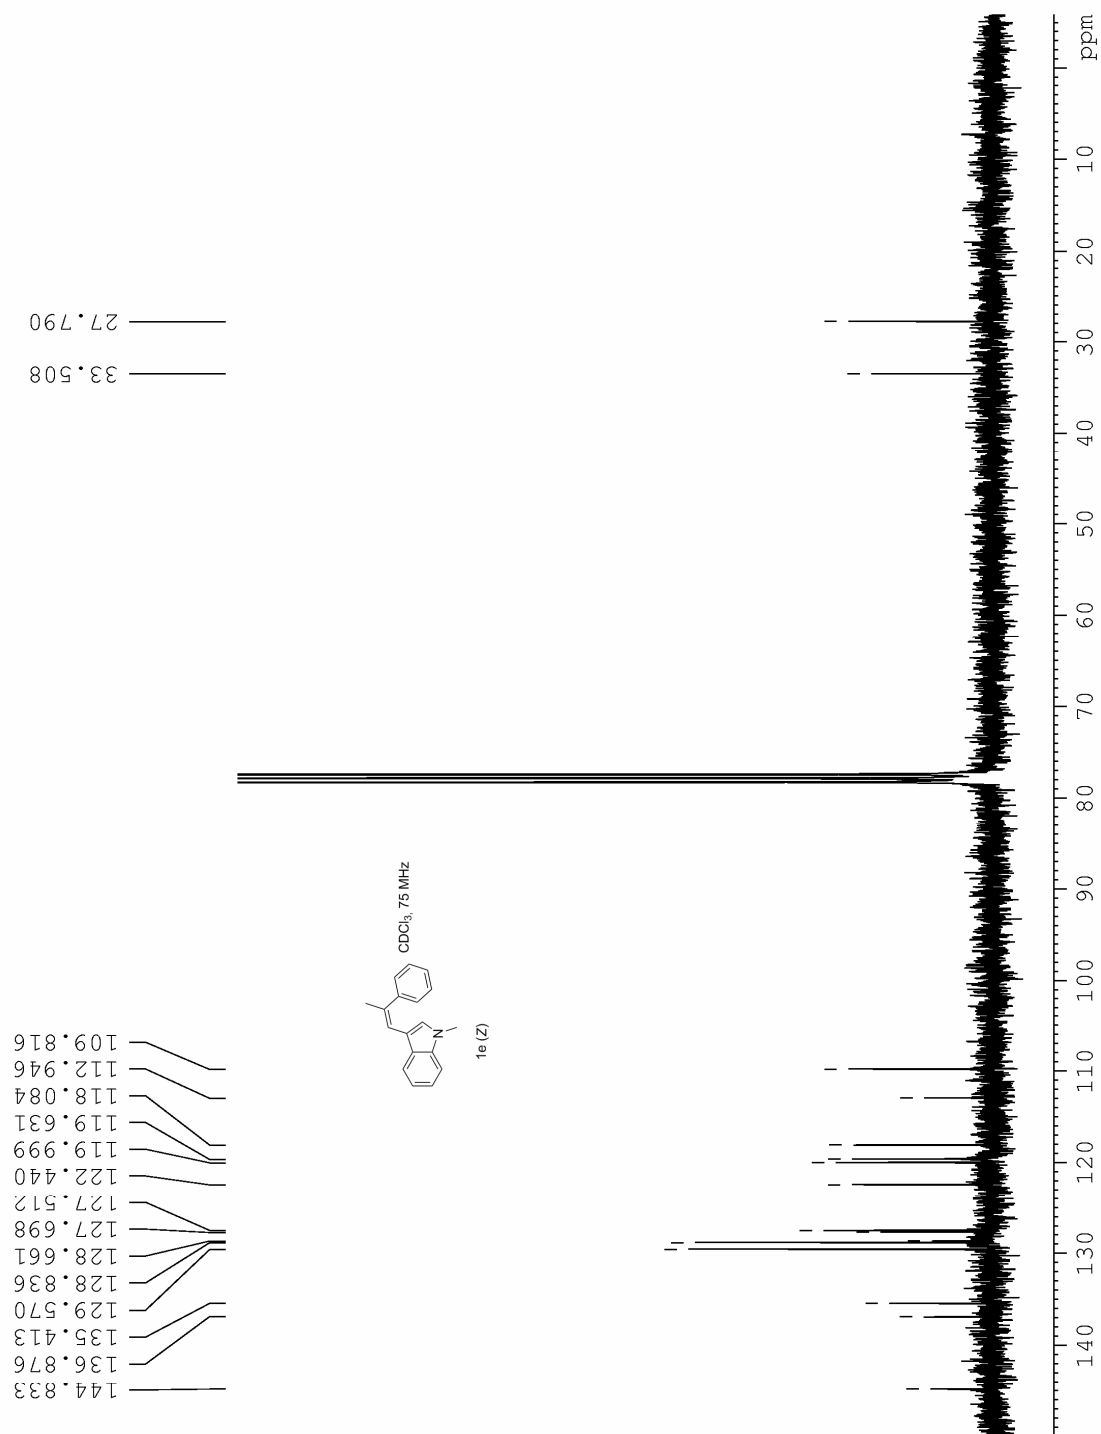

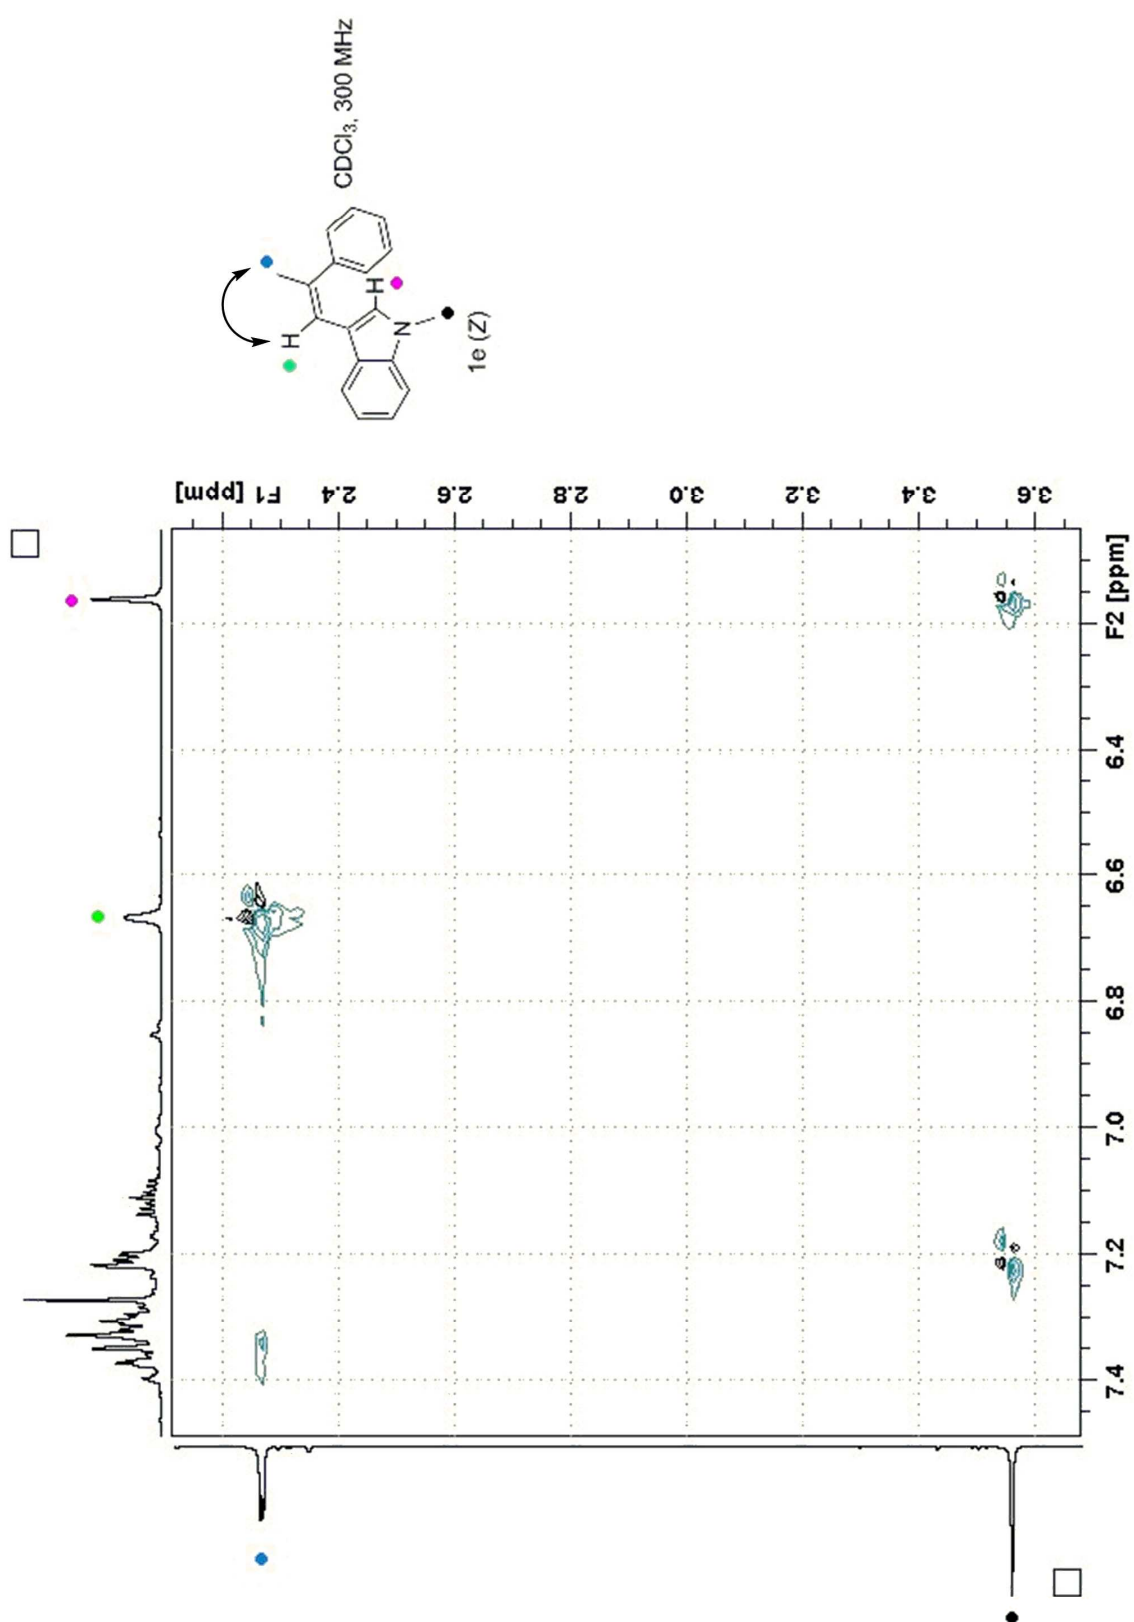

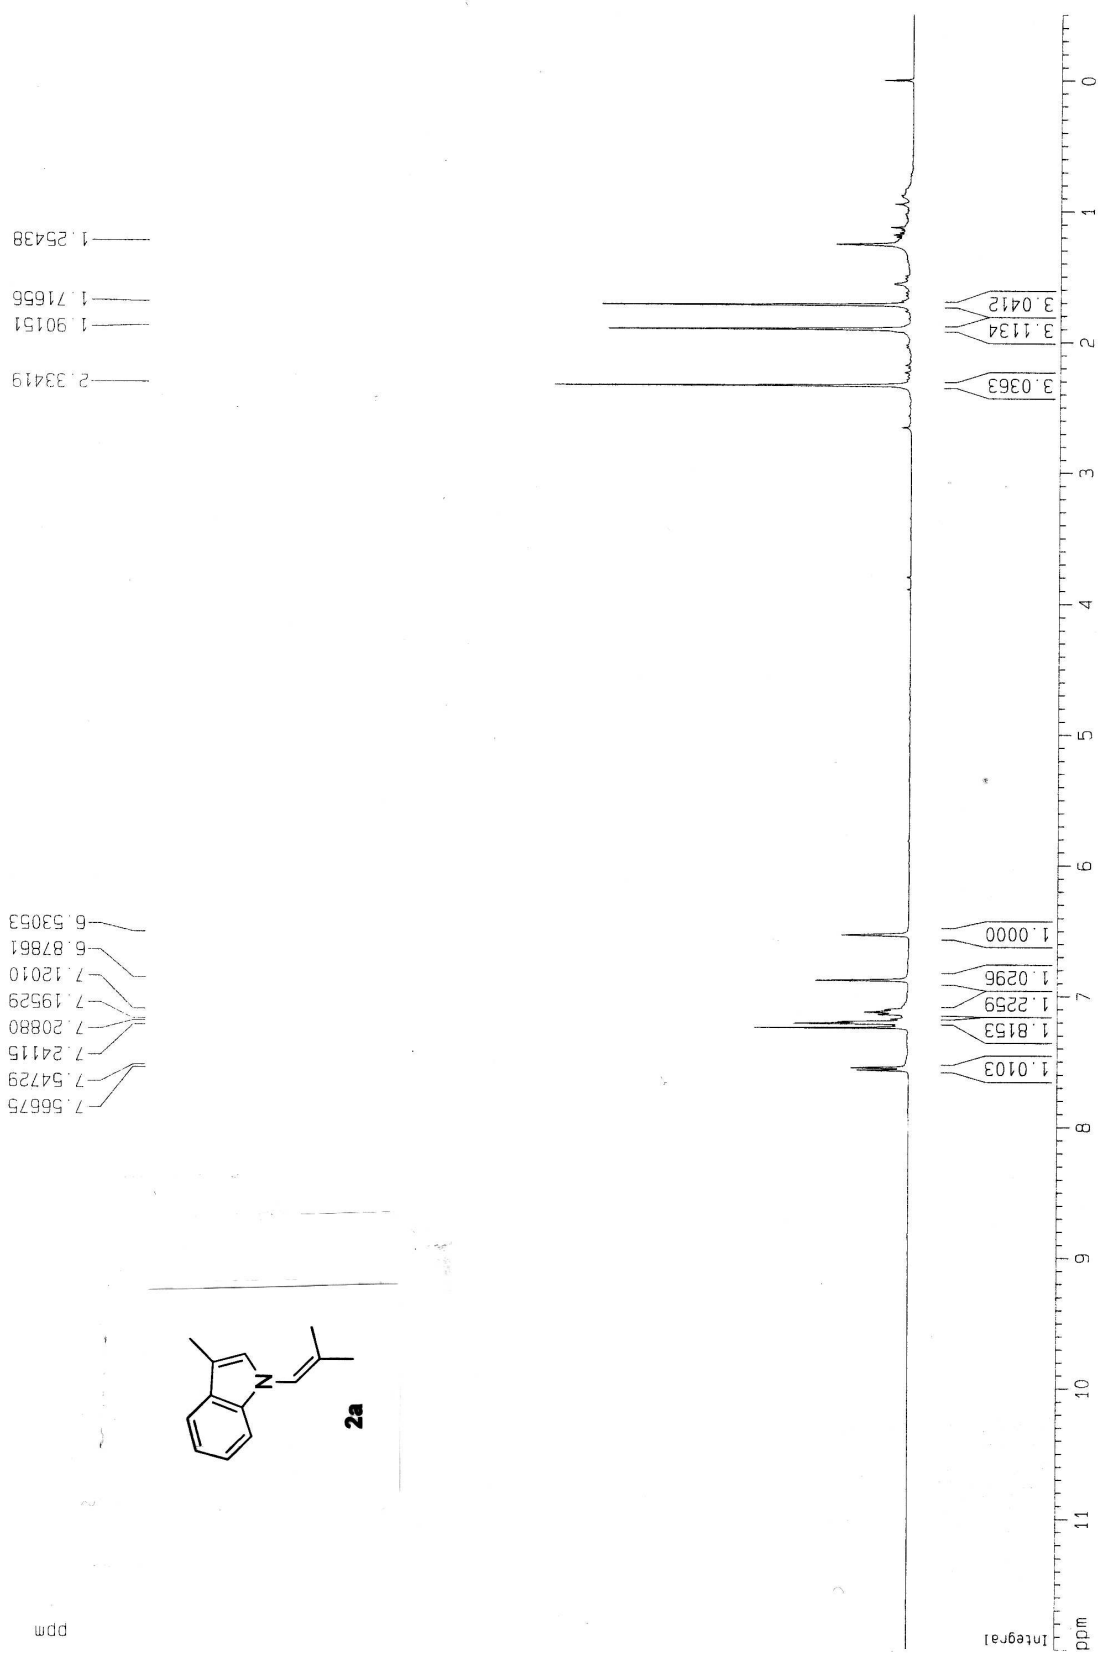



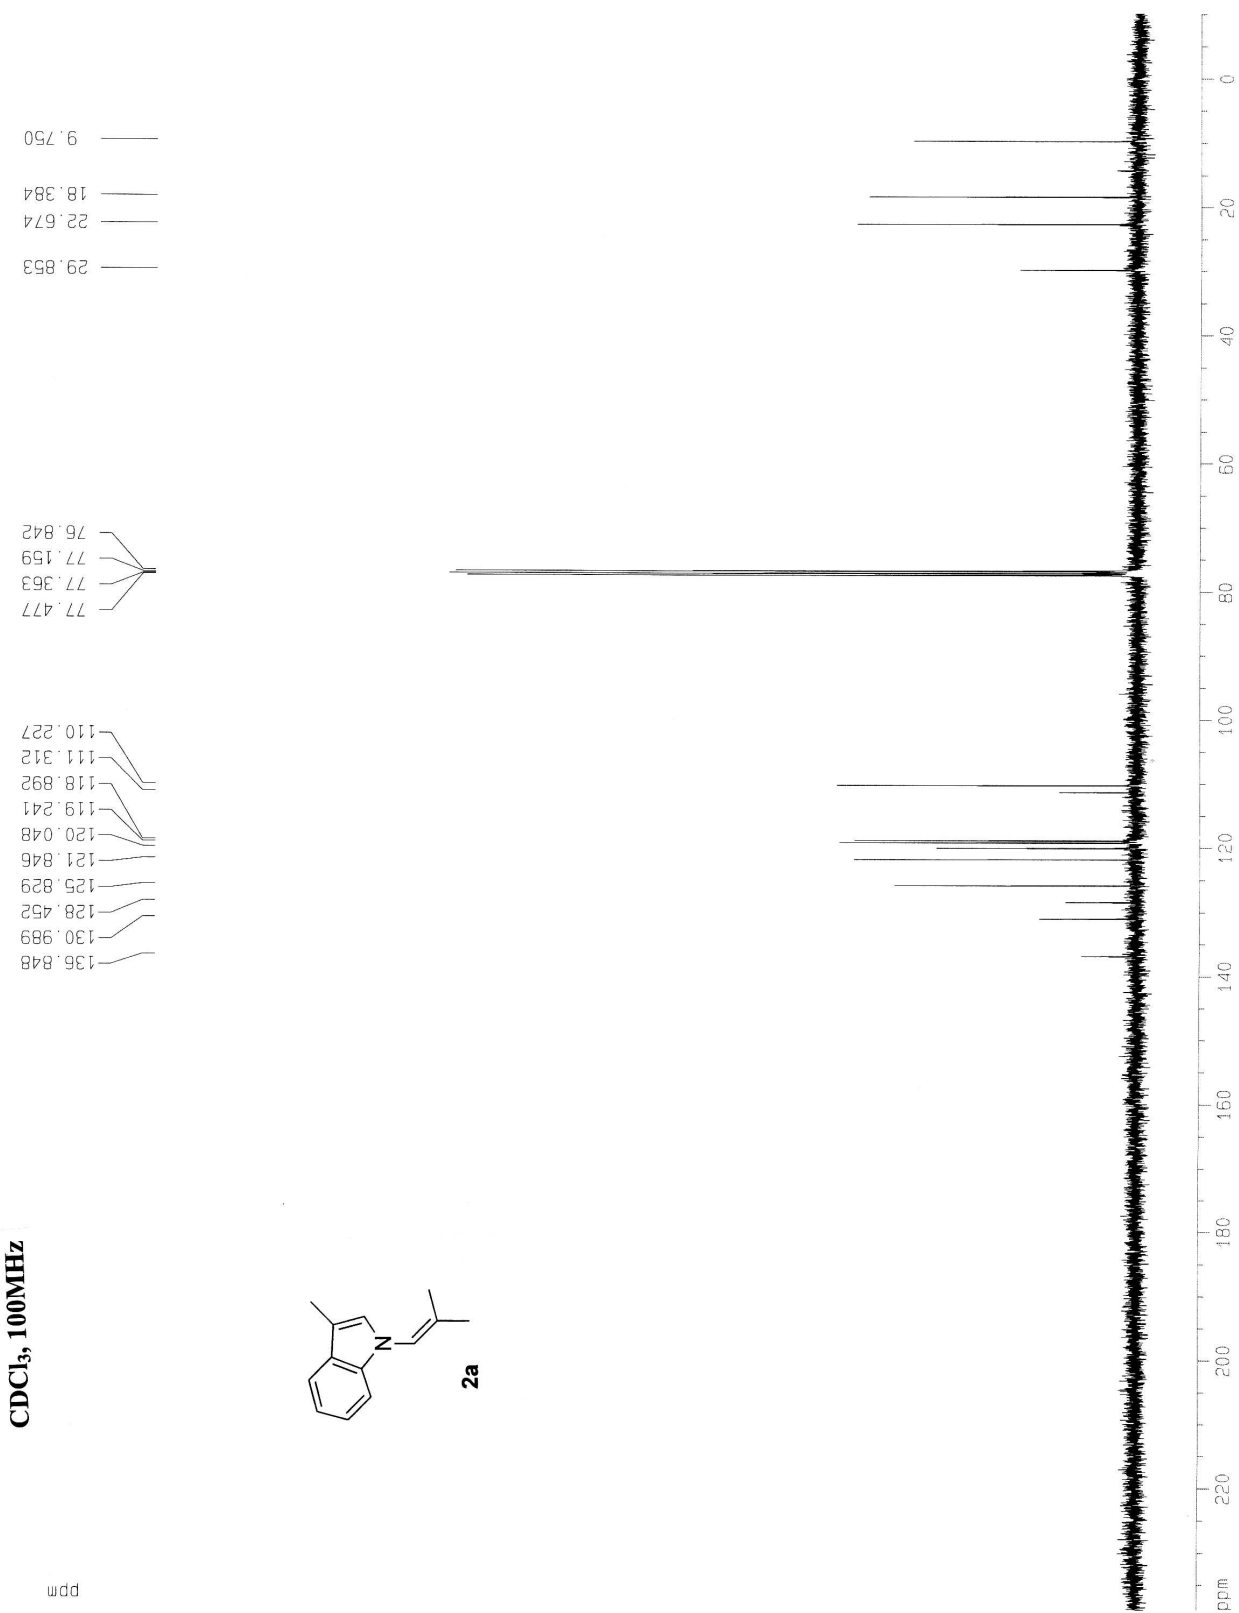

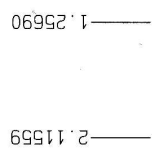

| Age Group | Very important | Important | Somewhat important | Not important | Don't know |
|-----------|----------------|-----------|--------------------|---------------|------------|
| 18-24     | 7.50883        | 7.48971   | 7.42788            | 7.40767       | 7.31729    |
| 25-34     | 7.31239        | 7.23272   | 7.22543            | 7.21799       | 7.20774    |
| 35-44     | 7.18124        | 7.16255   | 7.15084            | 7.13915       | 7.12746    |
| 45-54     | 6.39084        | 6.38015   | 6.36946            | 6.35877       | 6.34808    |

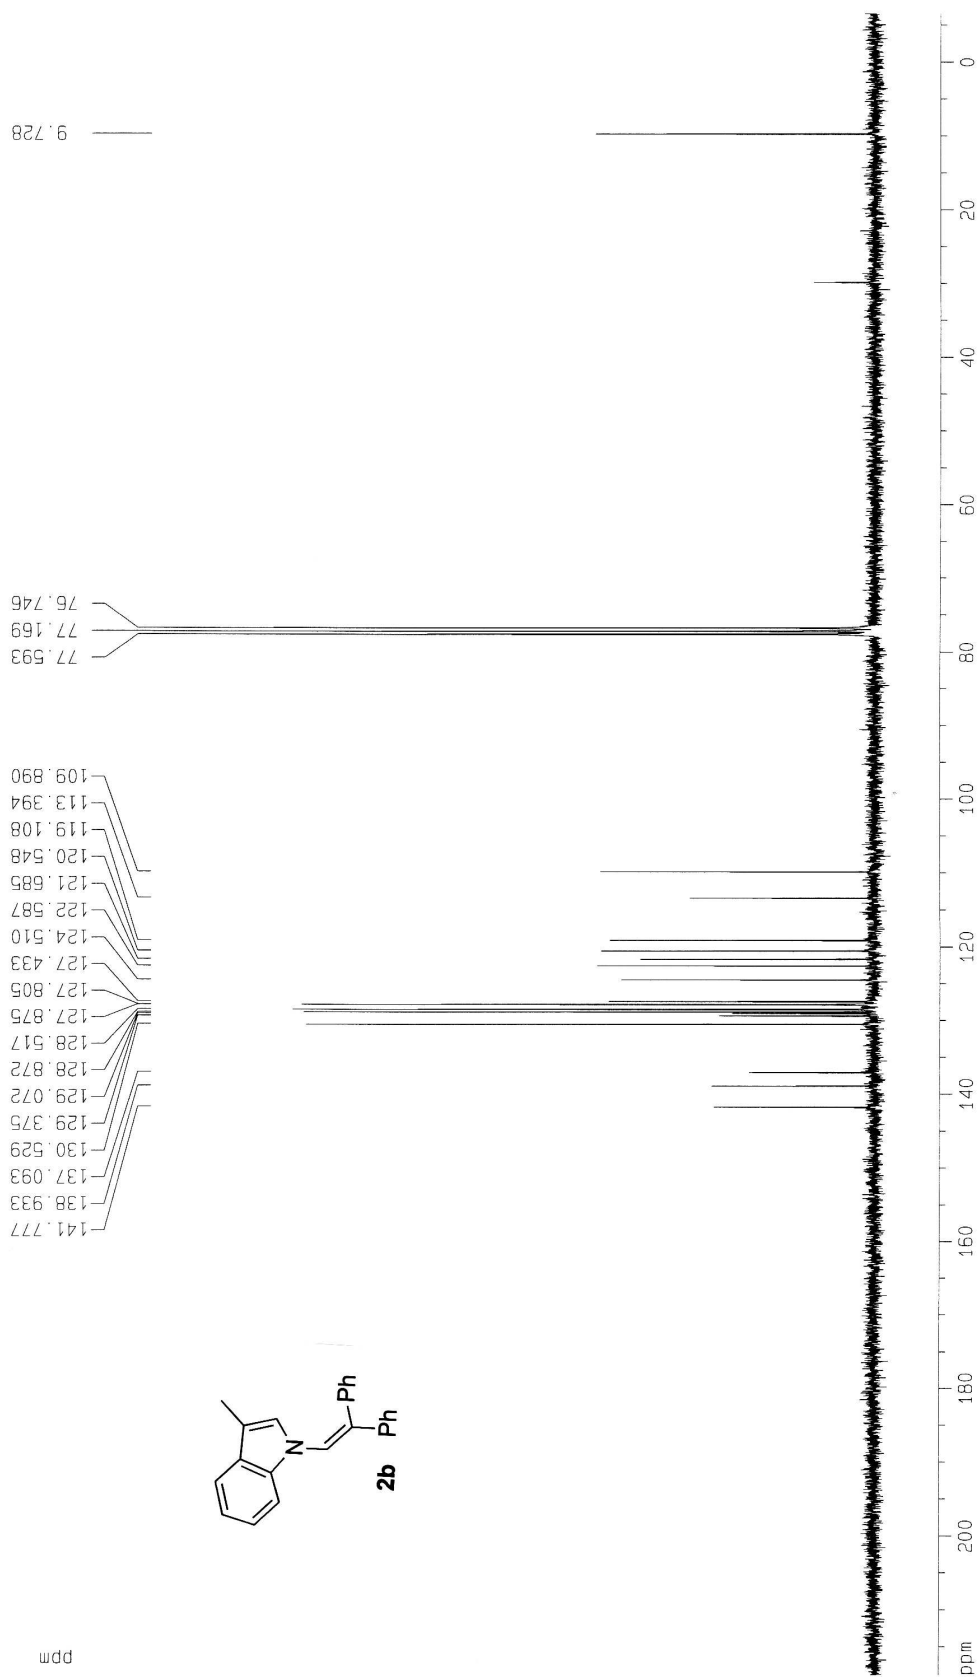

CDCl<sub>3</sub>, 75MHz

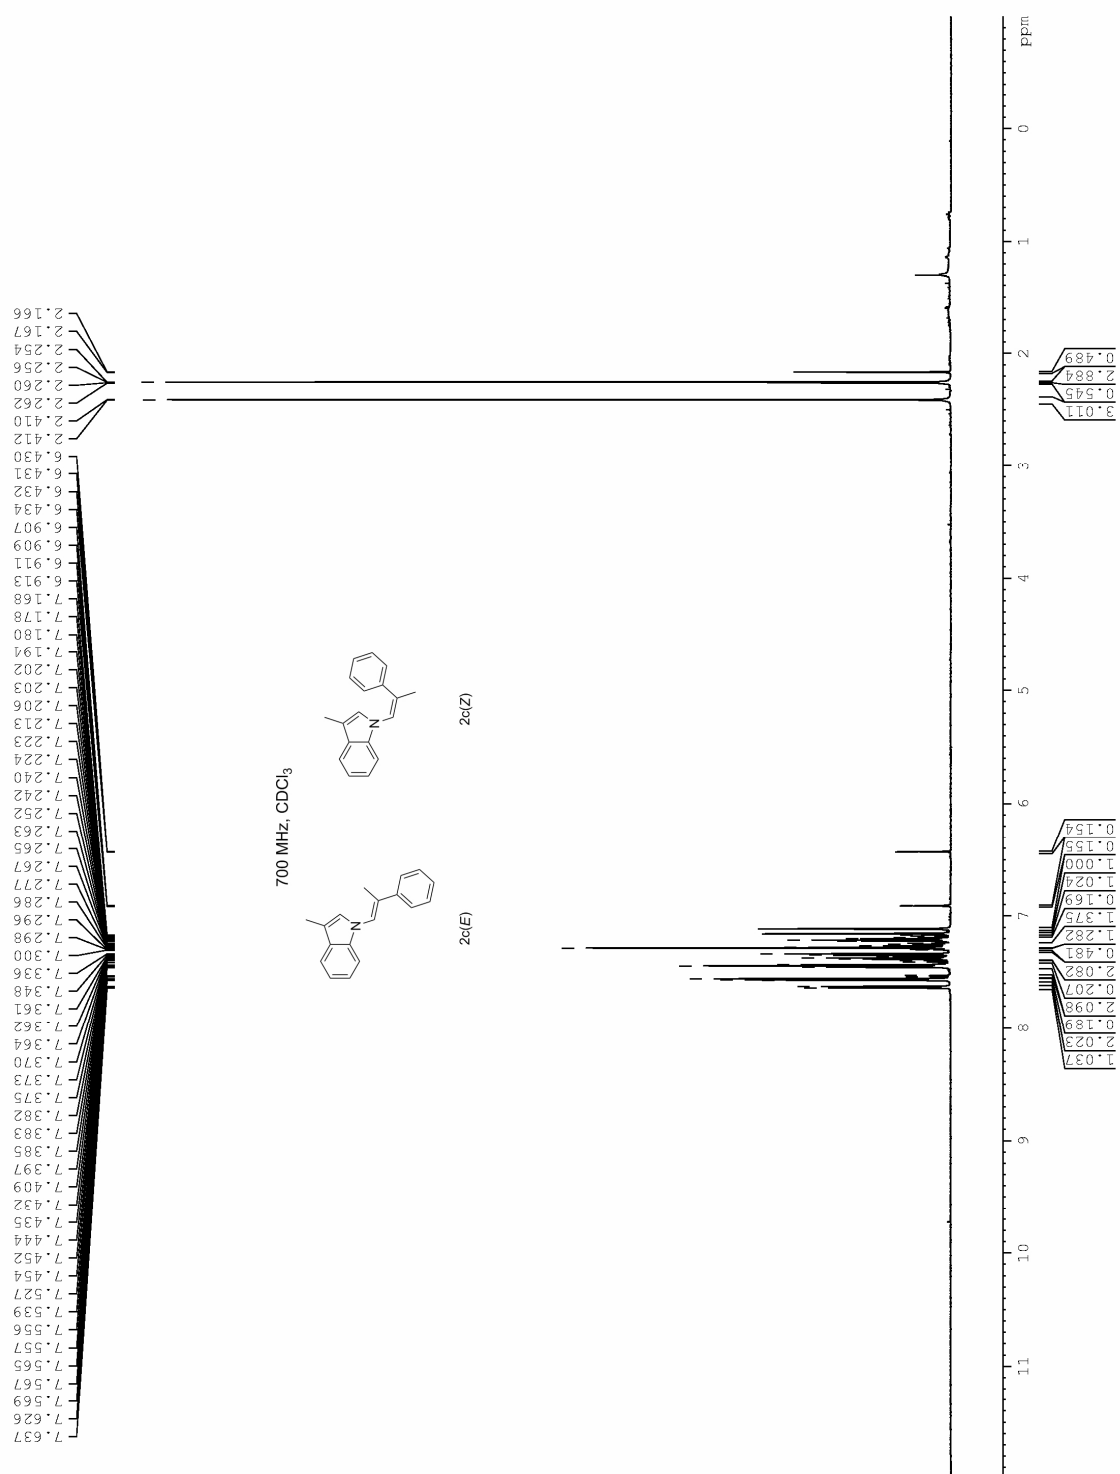

NB456 (2) -CDCl<sub>3</sub>-300MHz

141.885  
140.594  
137.864  
137.278  
131.478  
129.617  
129.457  
129.325  
128.994  
128.814  
128.451  
128.156  
127.484  
127.013  
126.156  
125.945  
123.317  
123.114  
122.894  
121.079  
120.698  
120.604  
119.890  
119.691  
119.254  
113.075  
111.087  
110.632

23.723  
17.488  
10.584  
10.437

CDCl<sub>3</sub> 75 MHz

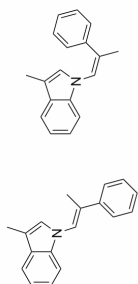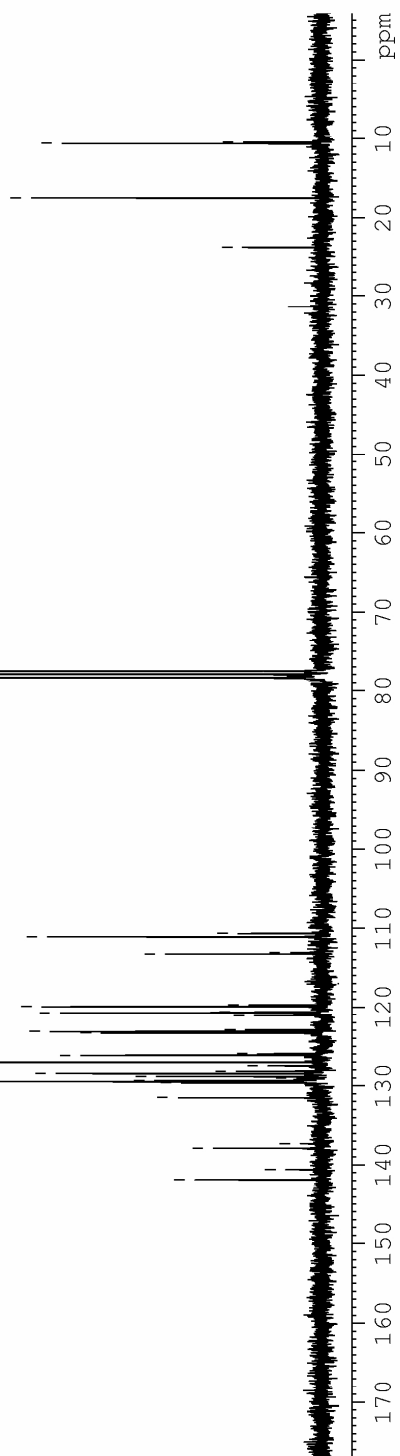

CDCl<sub>3</sub>, 700 MHz

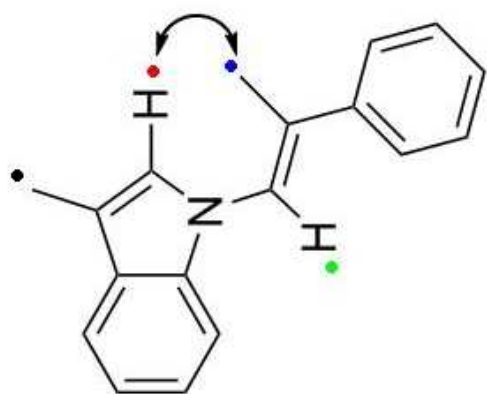

2c(E)

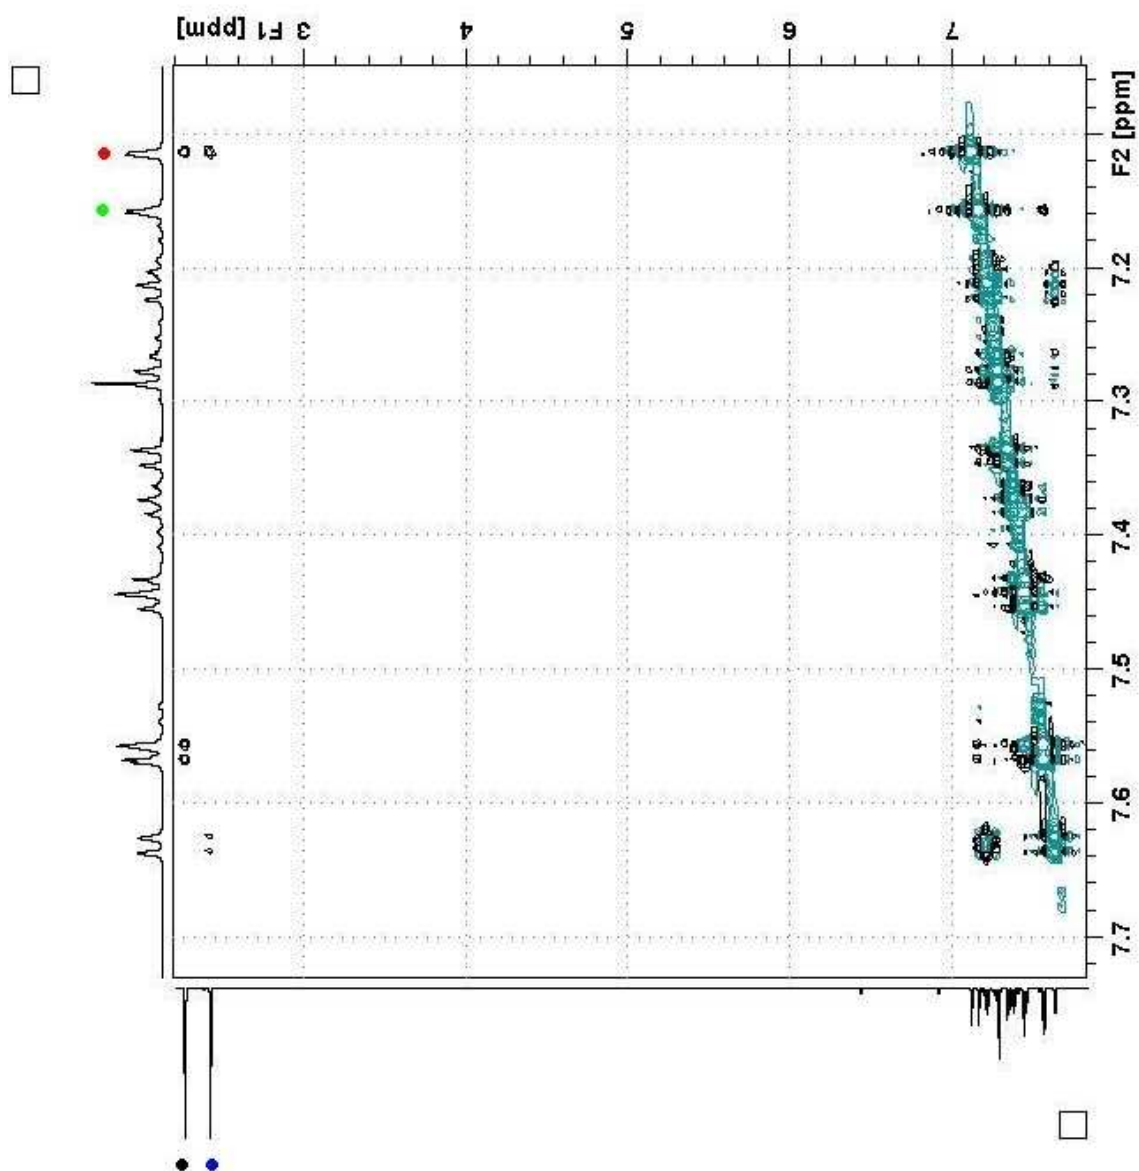

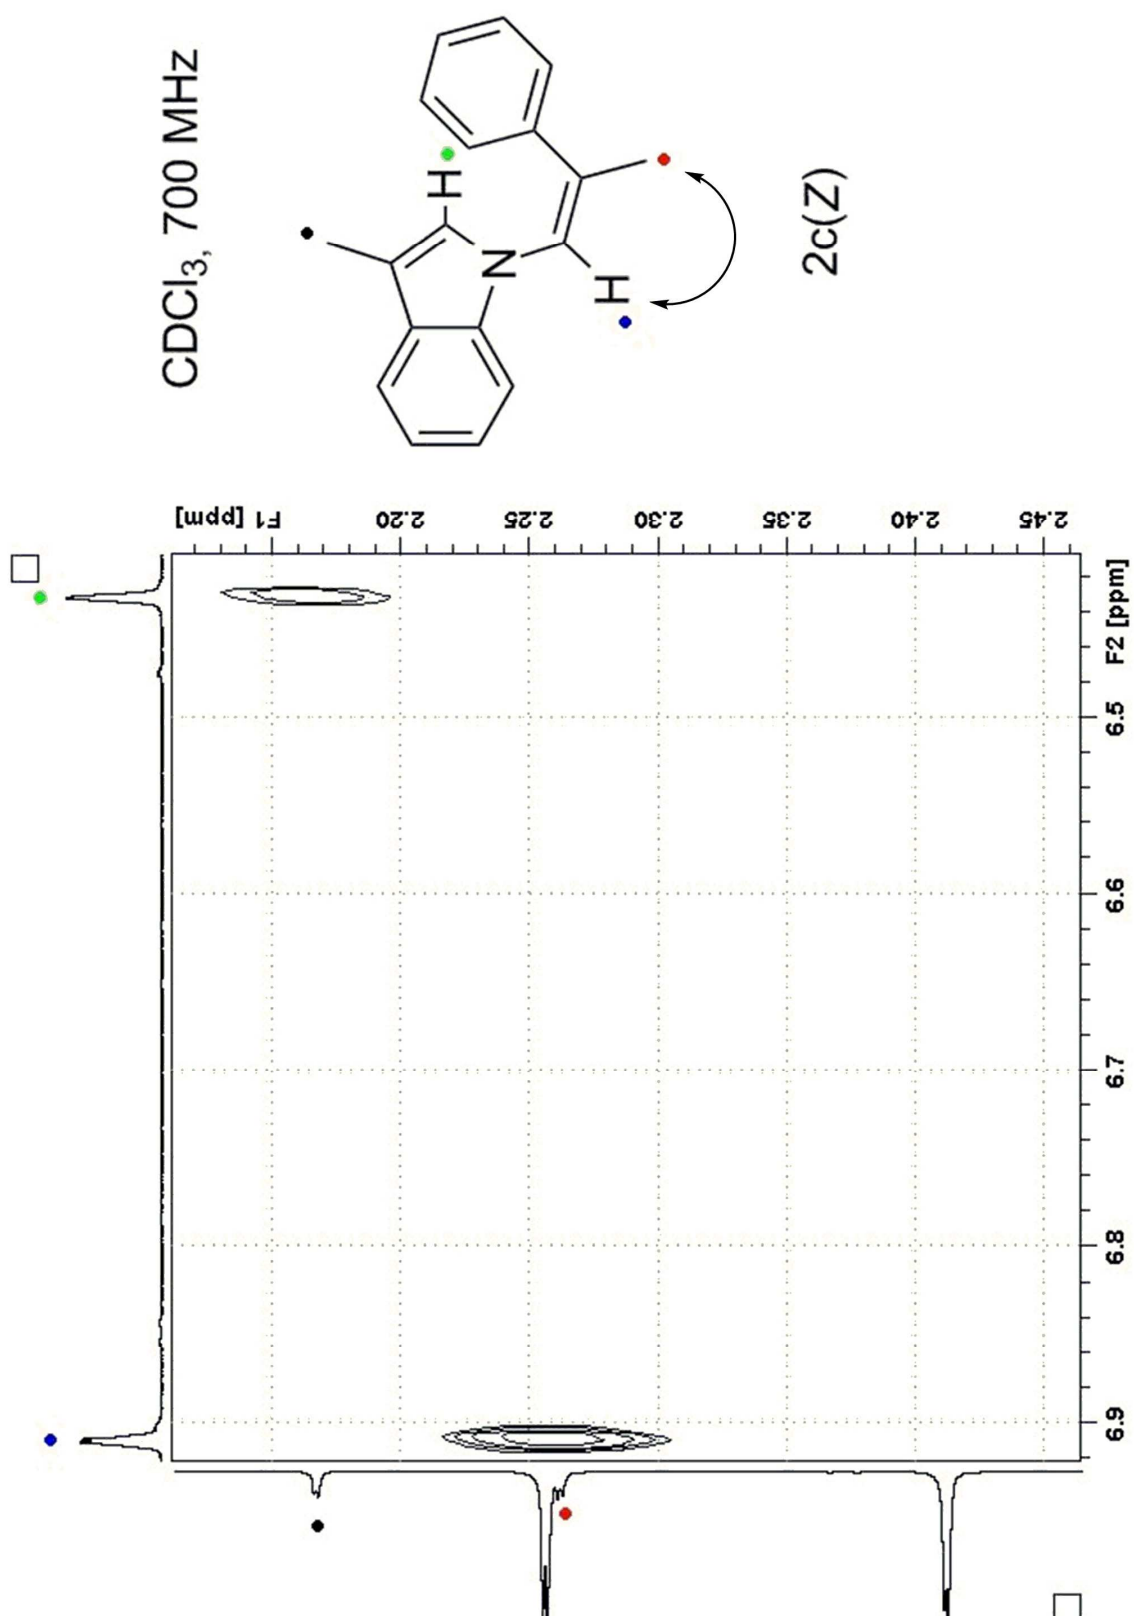

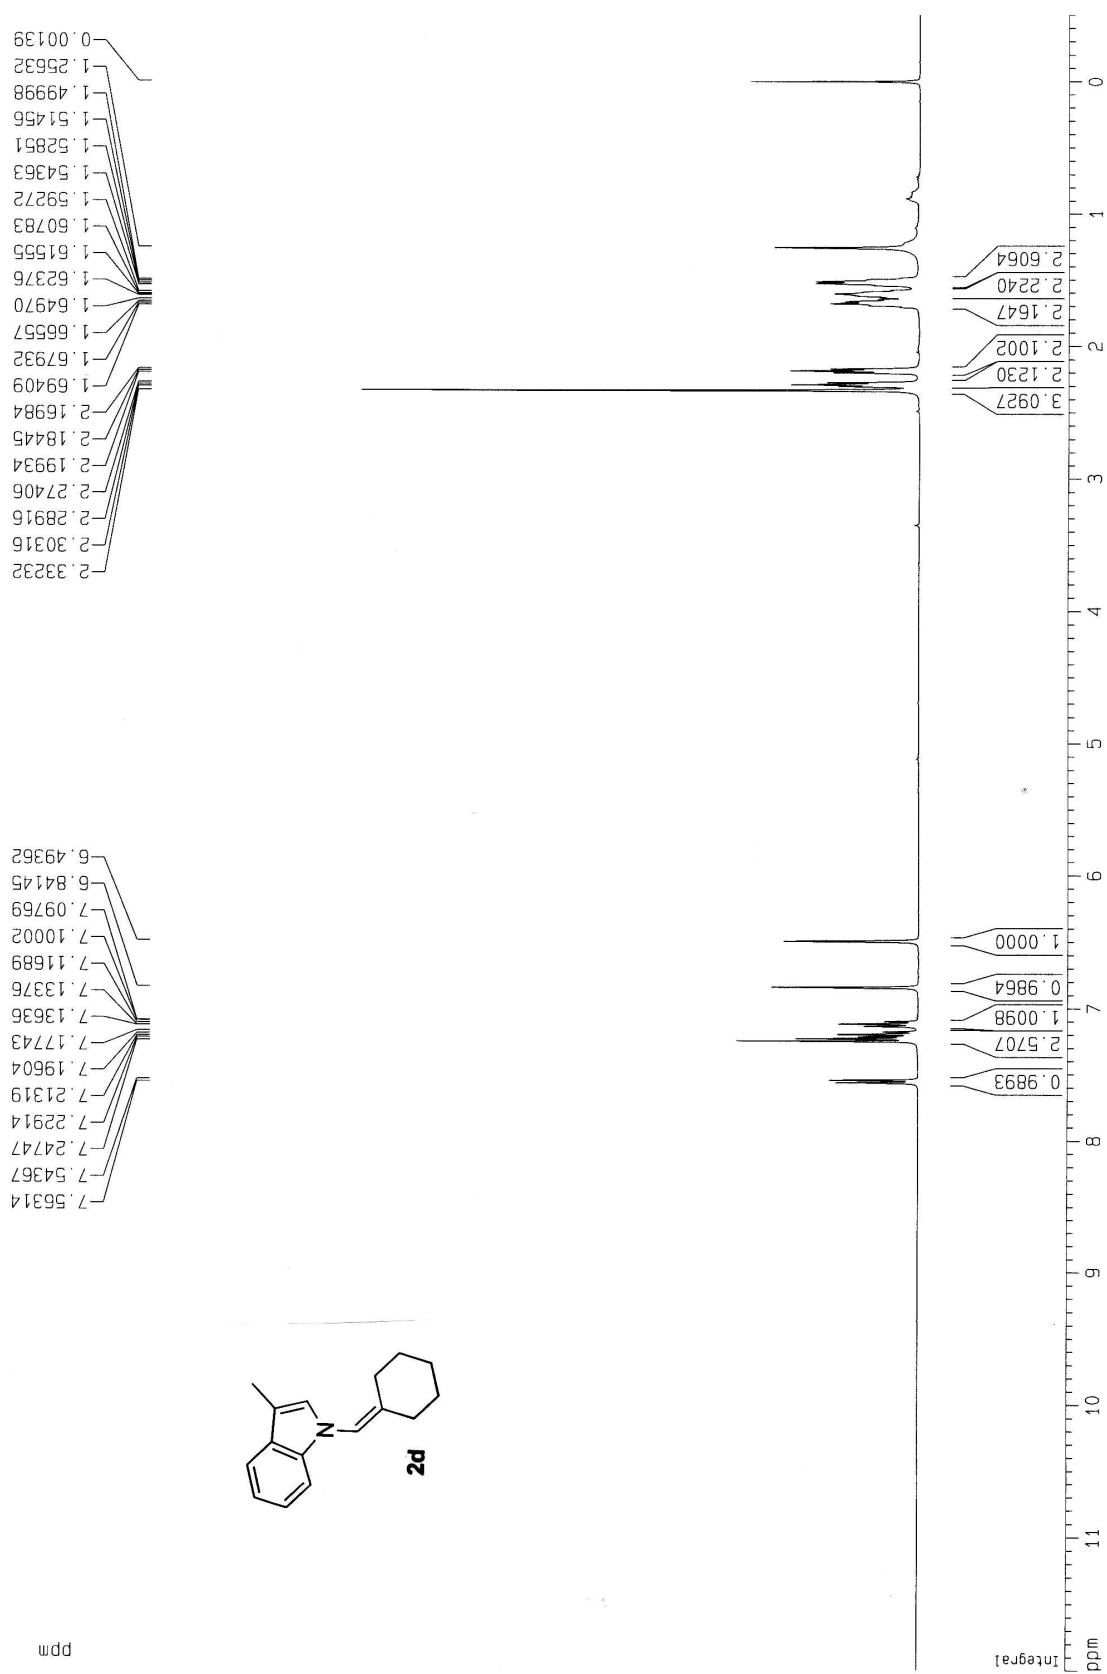

CDCl<sub>3</sub>, 400MHz



CDCl<sub>3</sub>, 75MHz

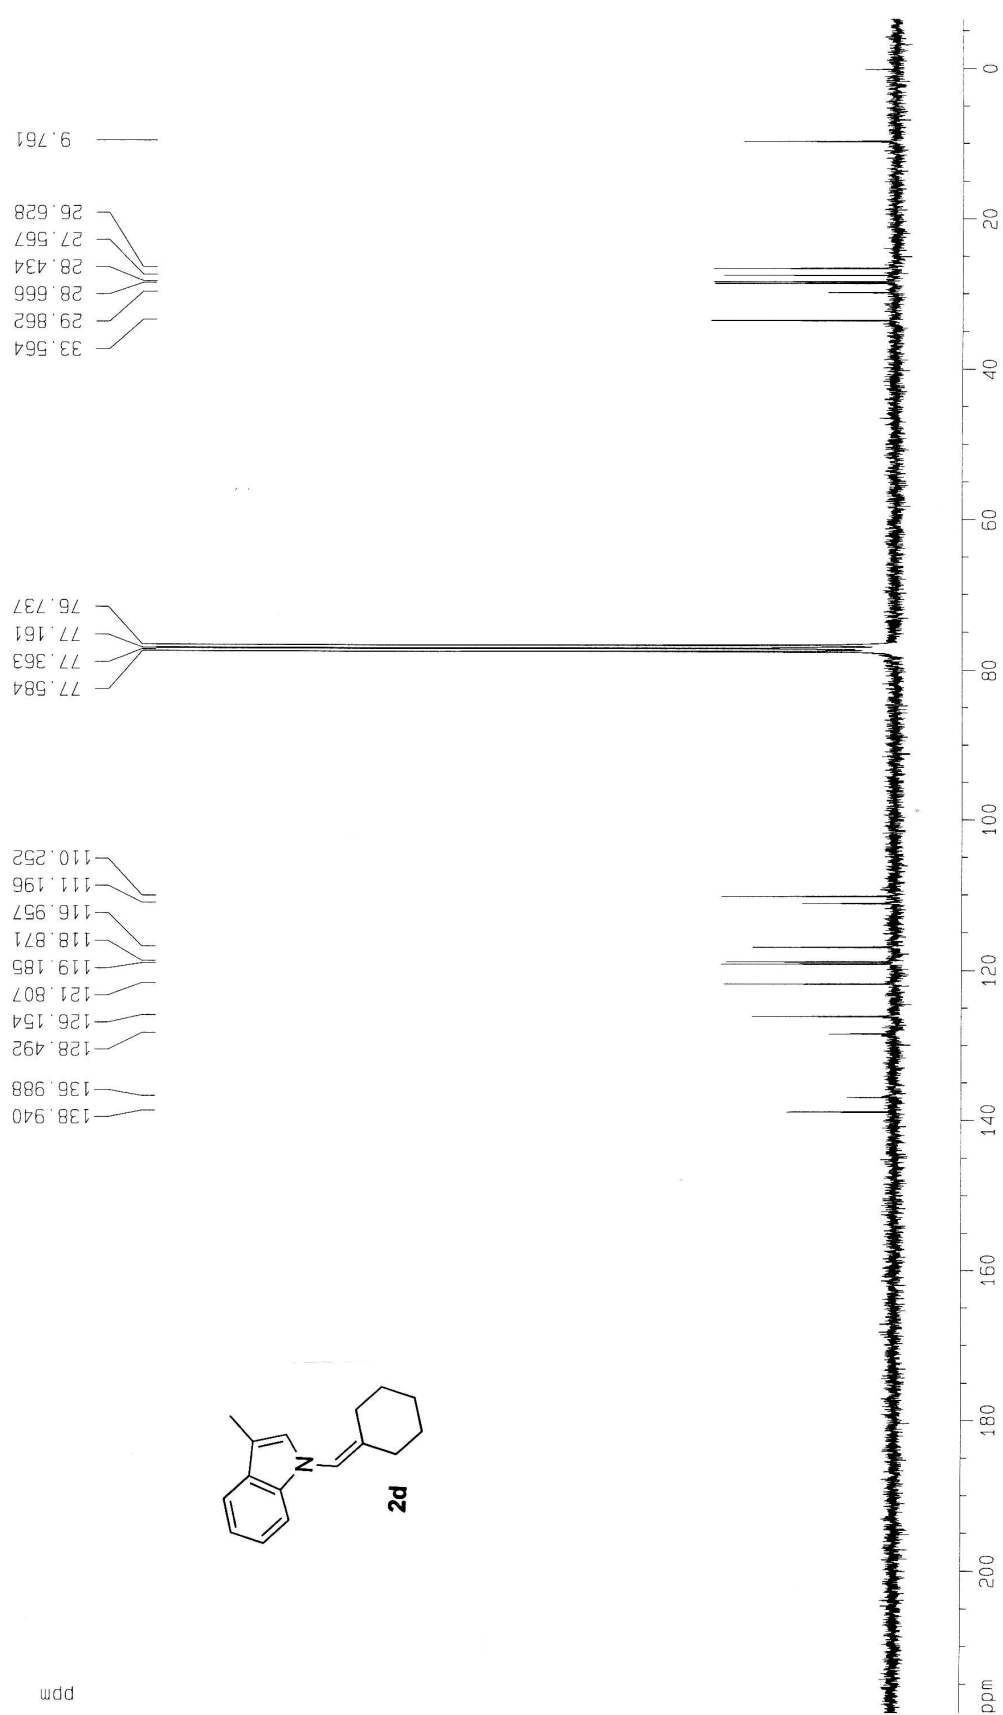

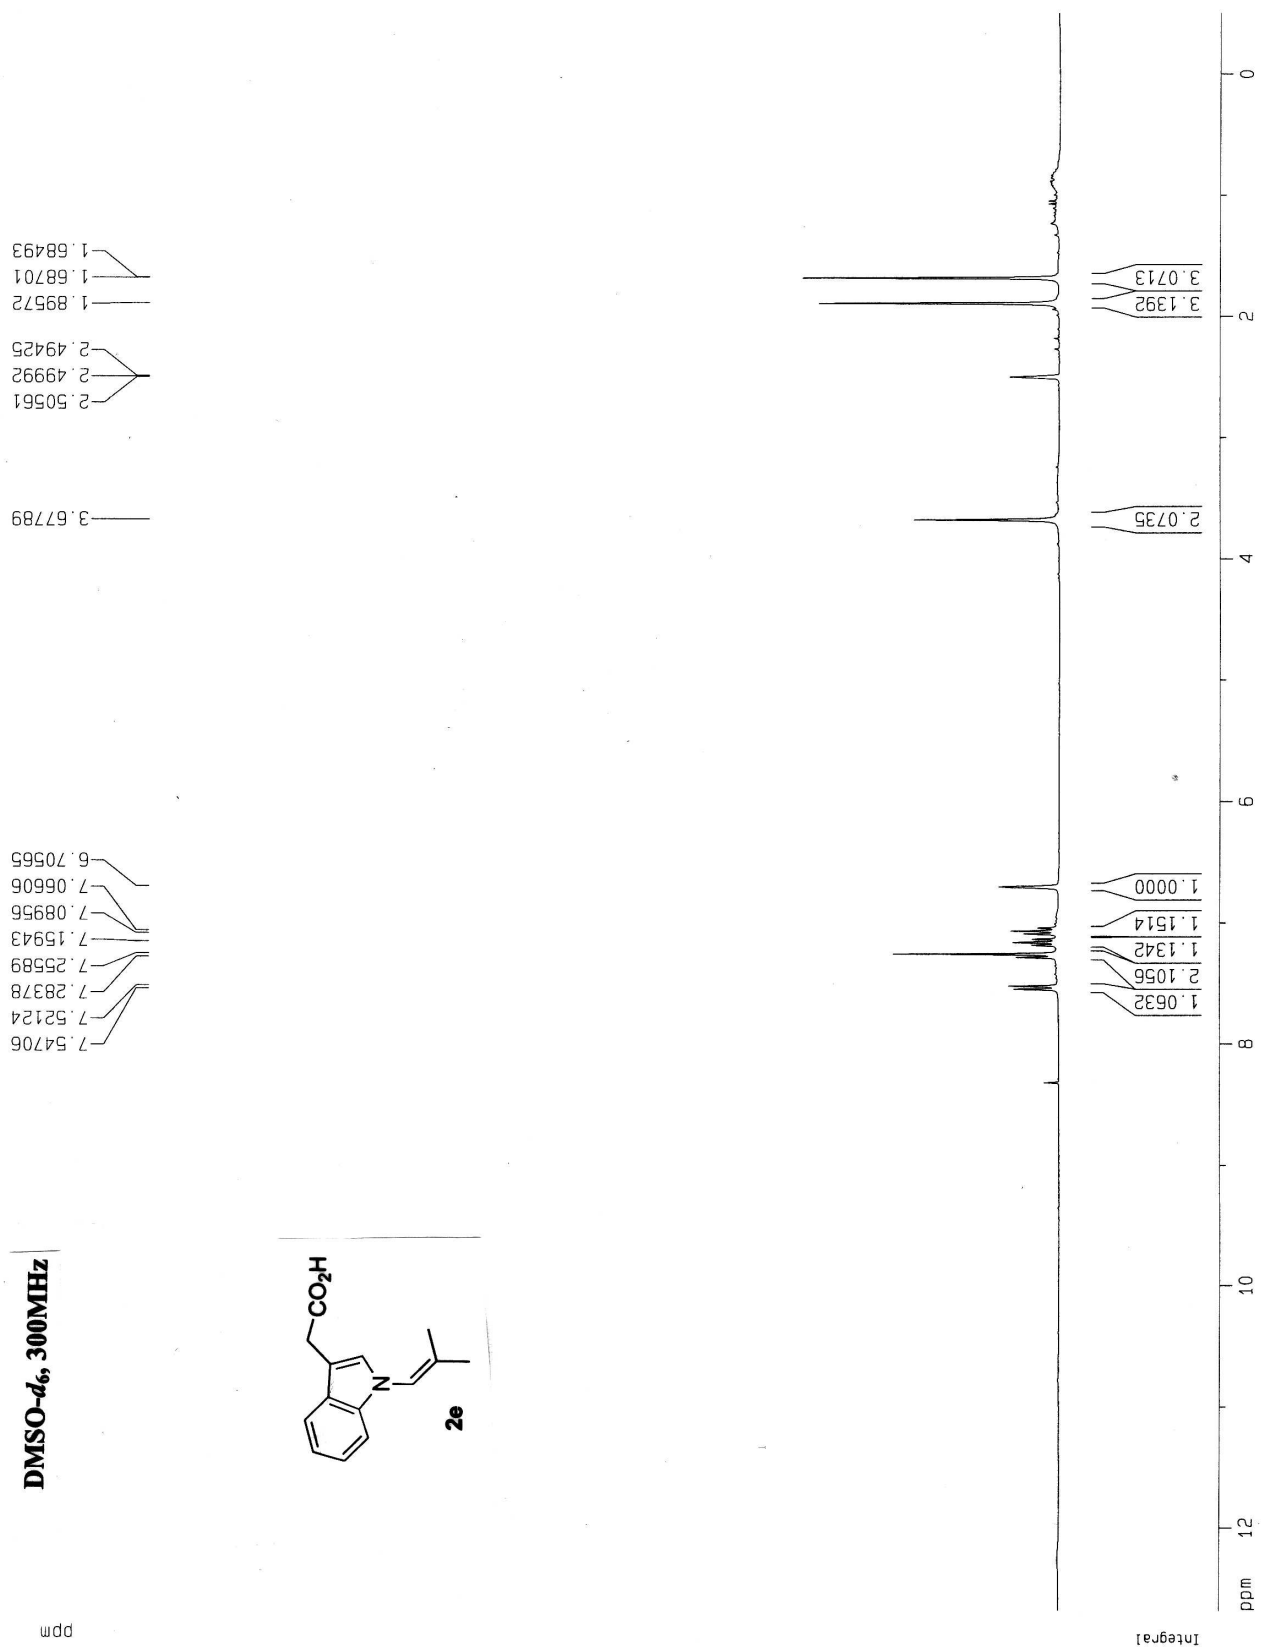

DMSO-*d*<sub>6</sub>, 75MHz

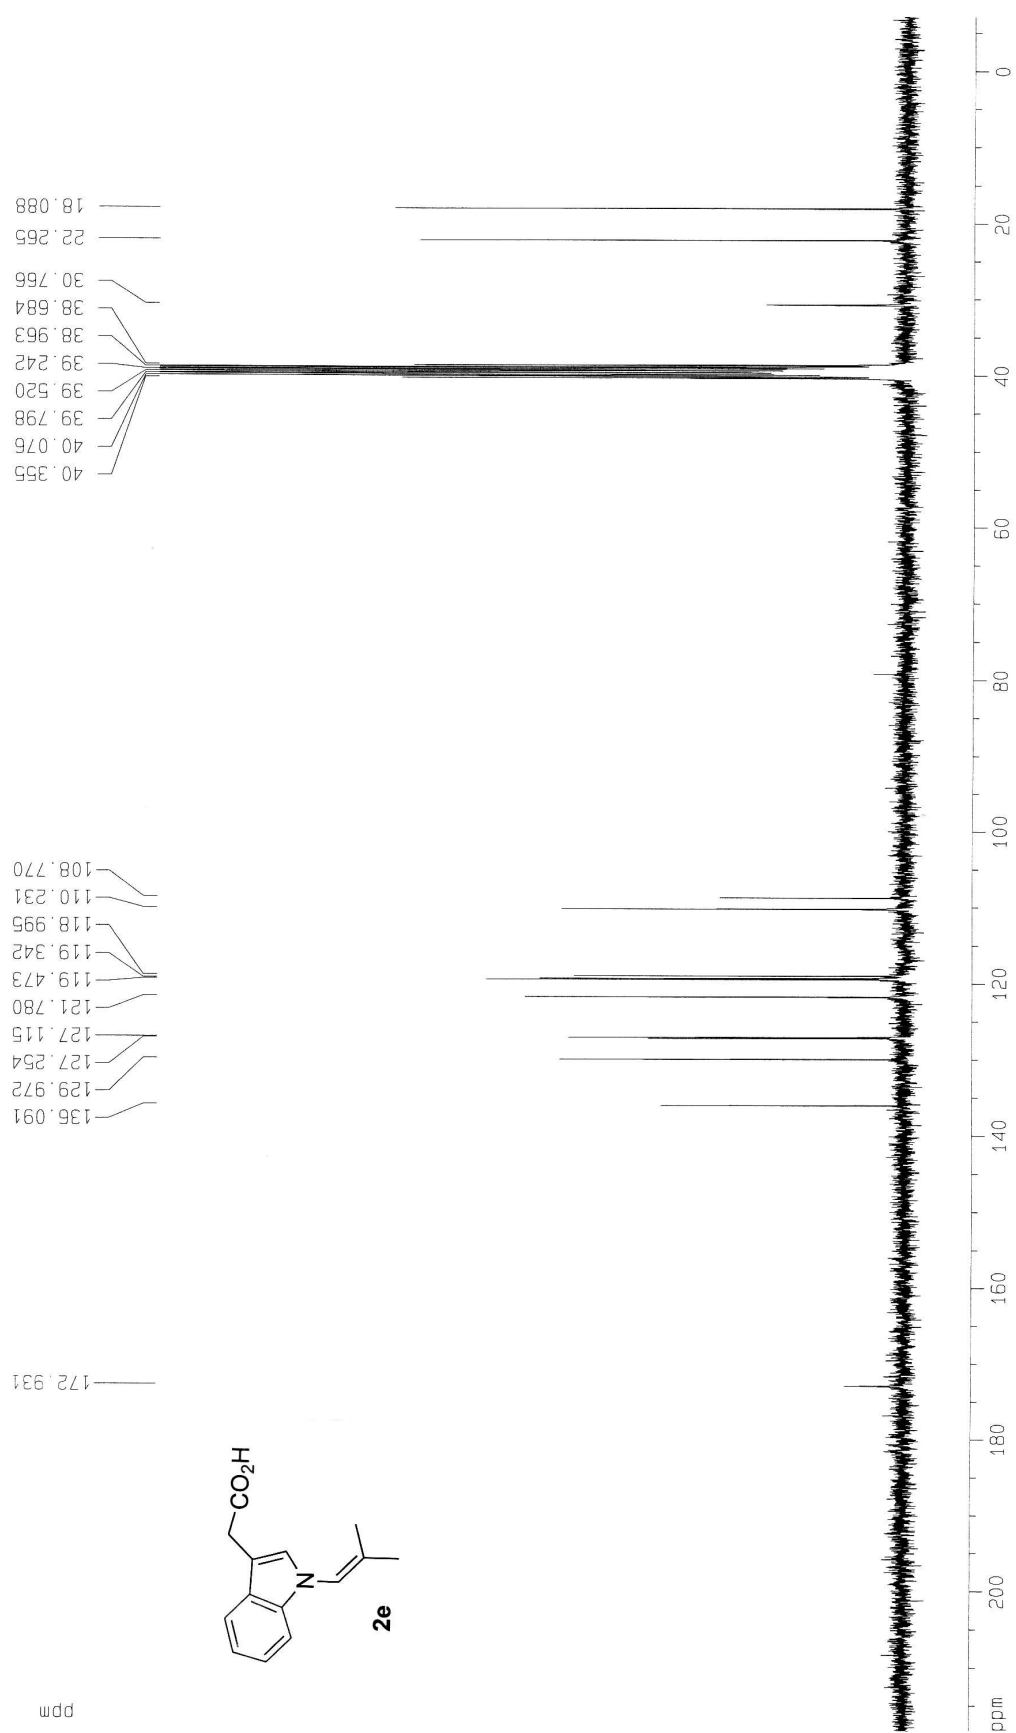

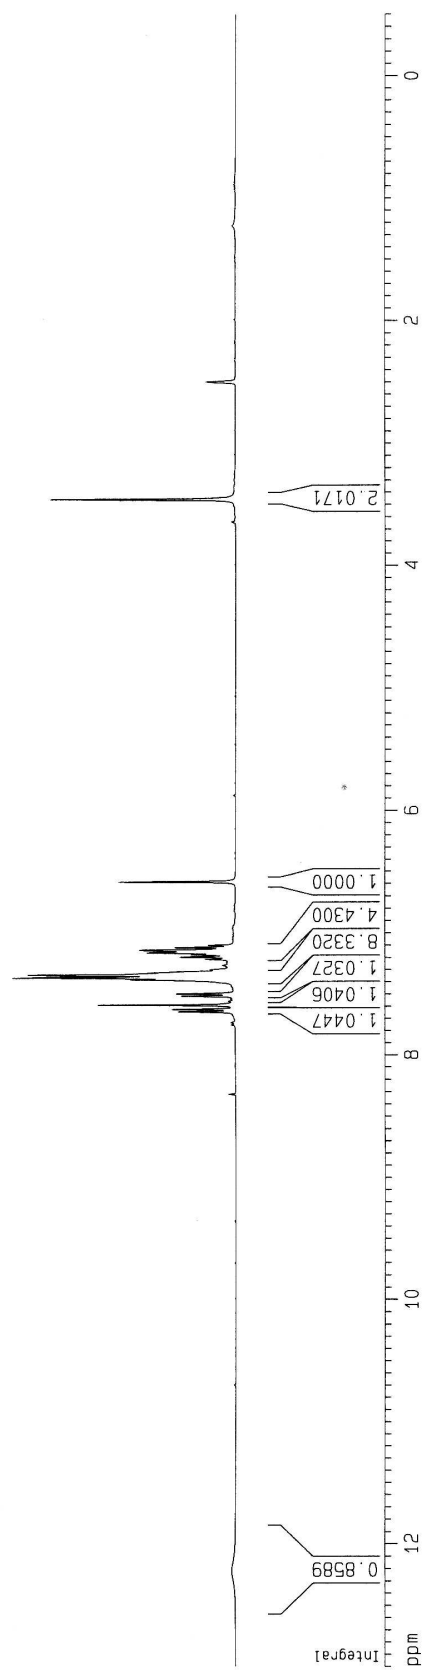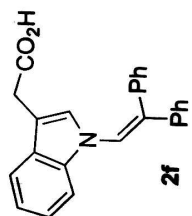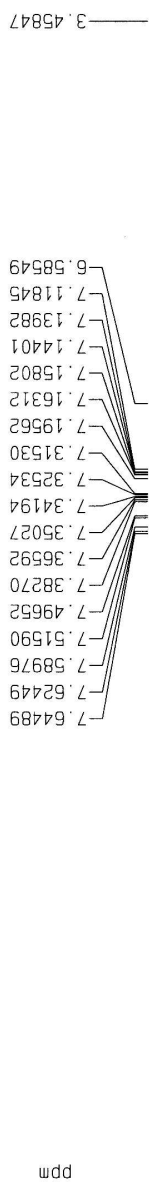

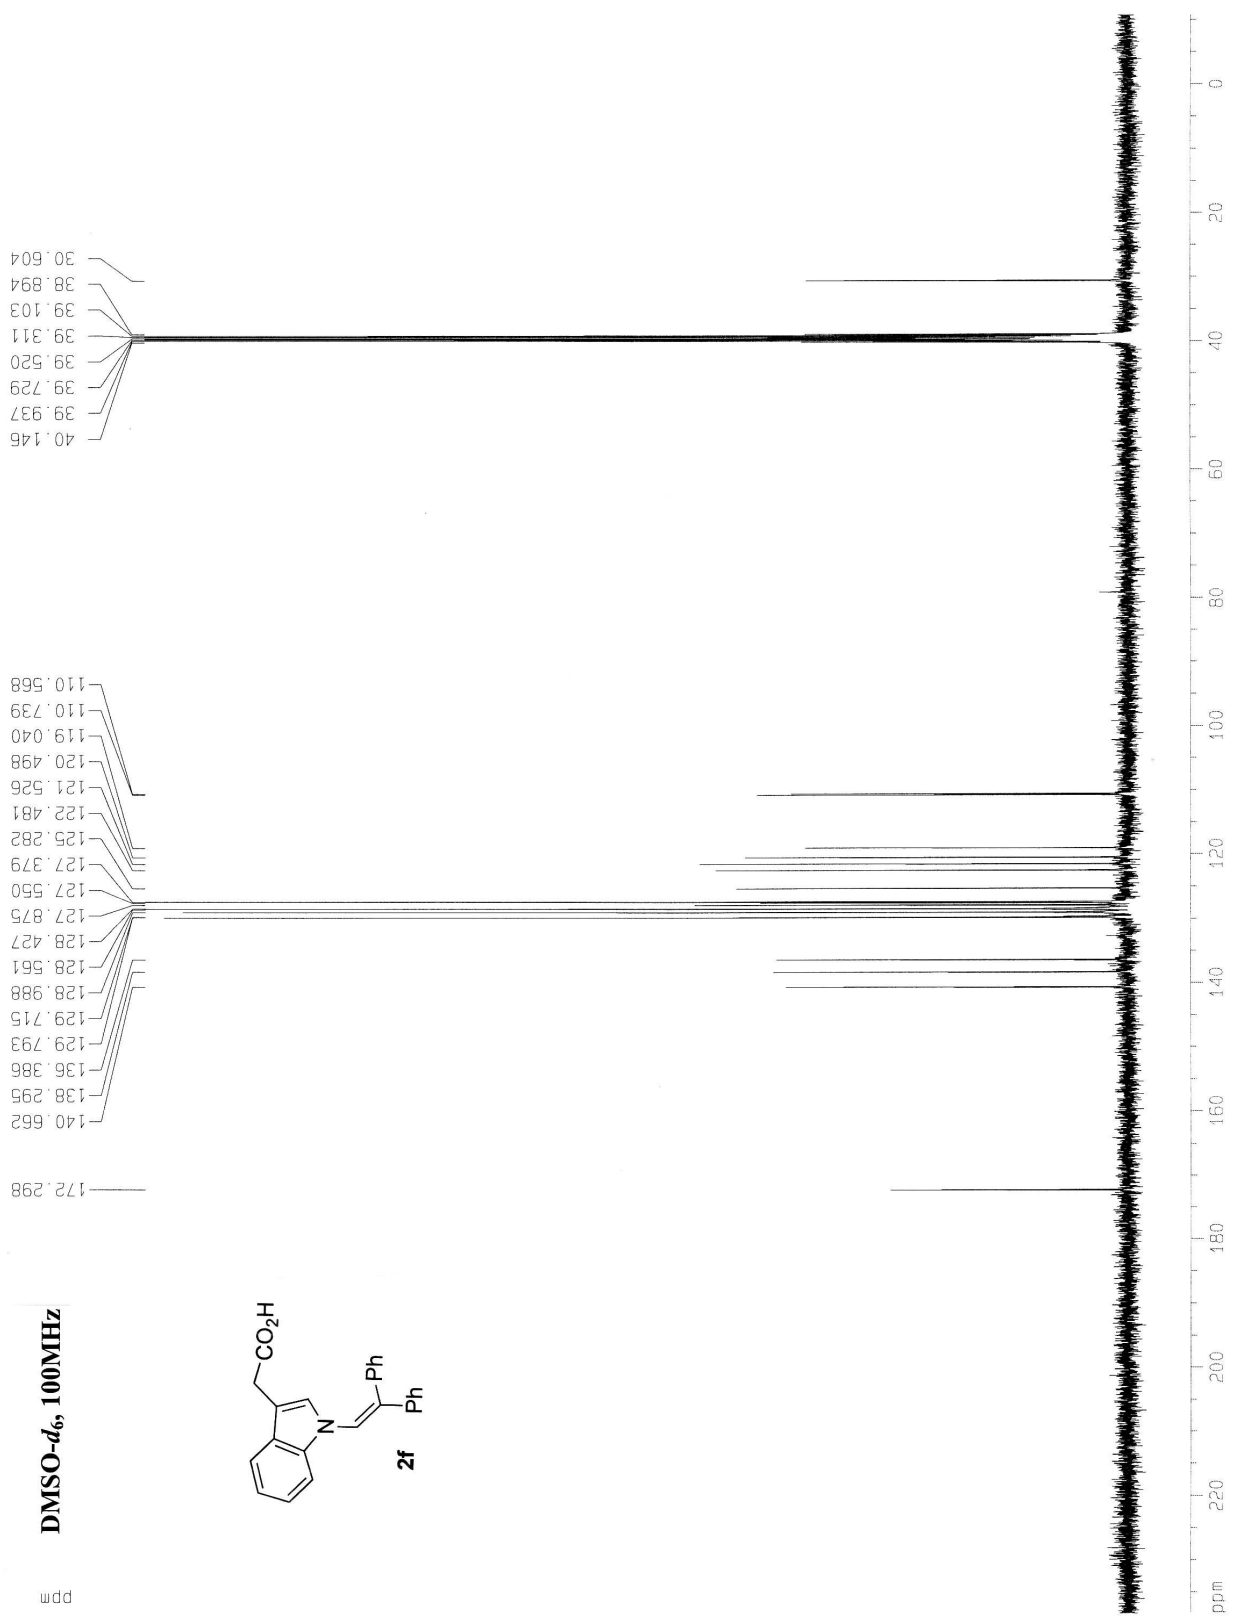

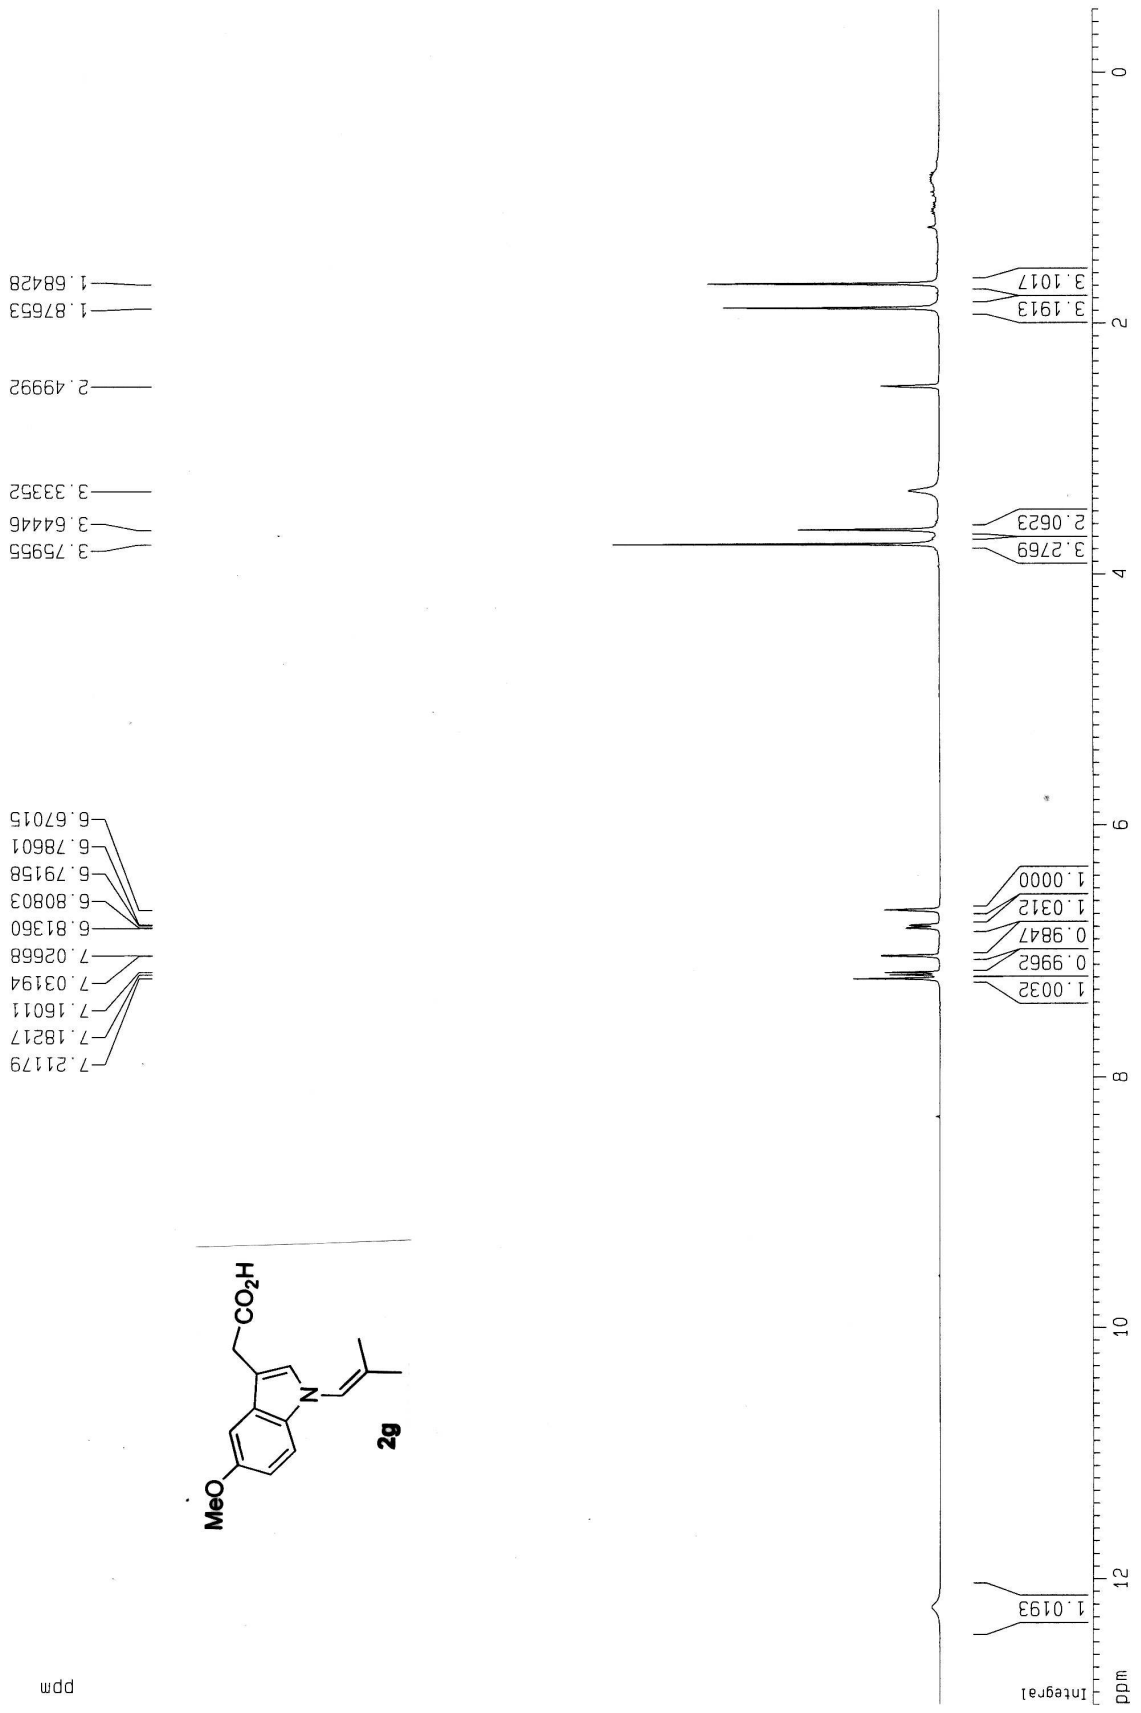

DMSO-*d*<sub>6</sub>, 75MHz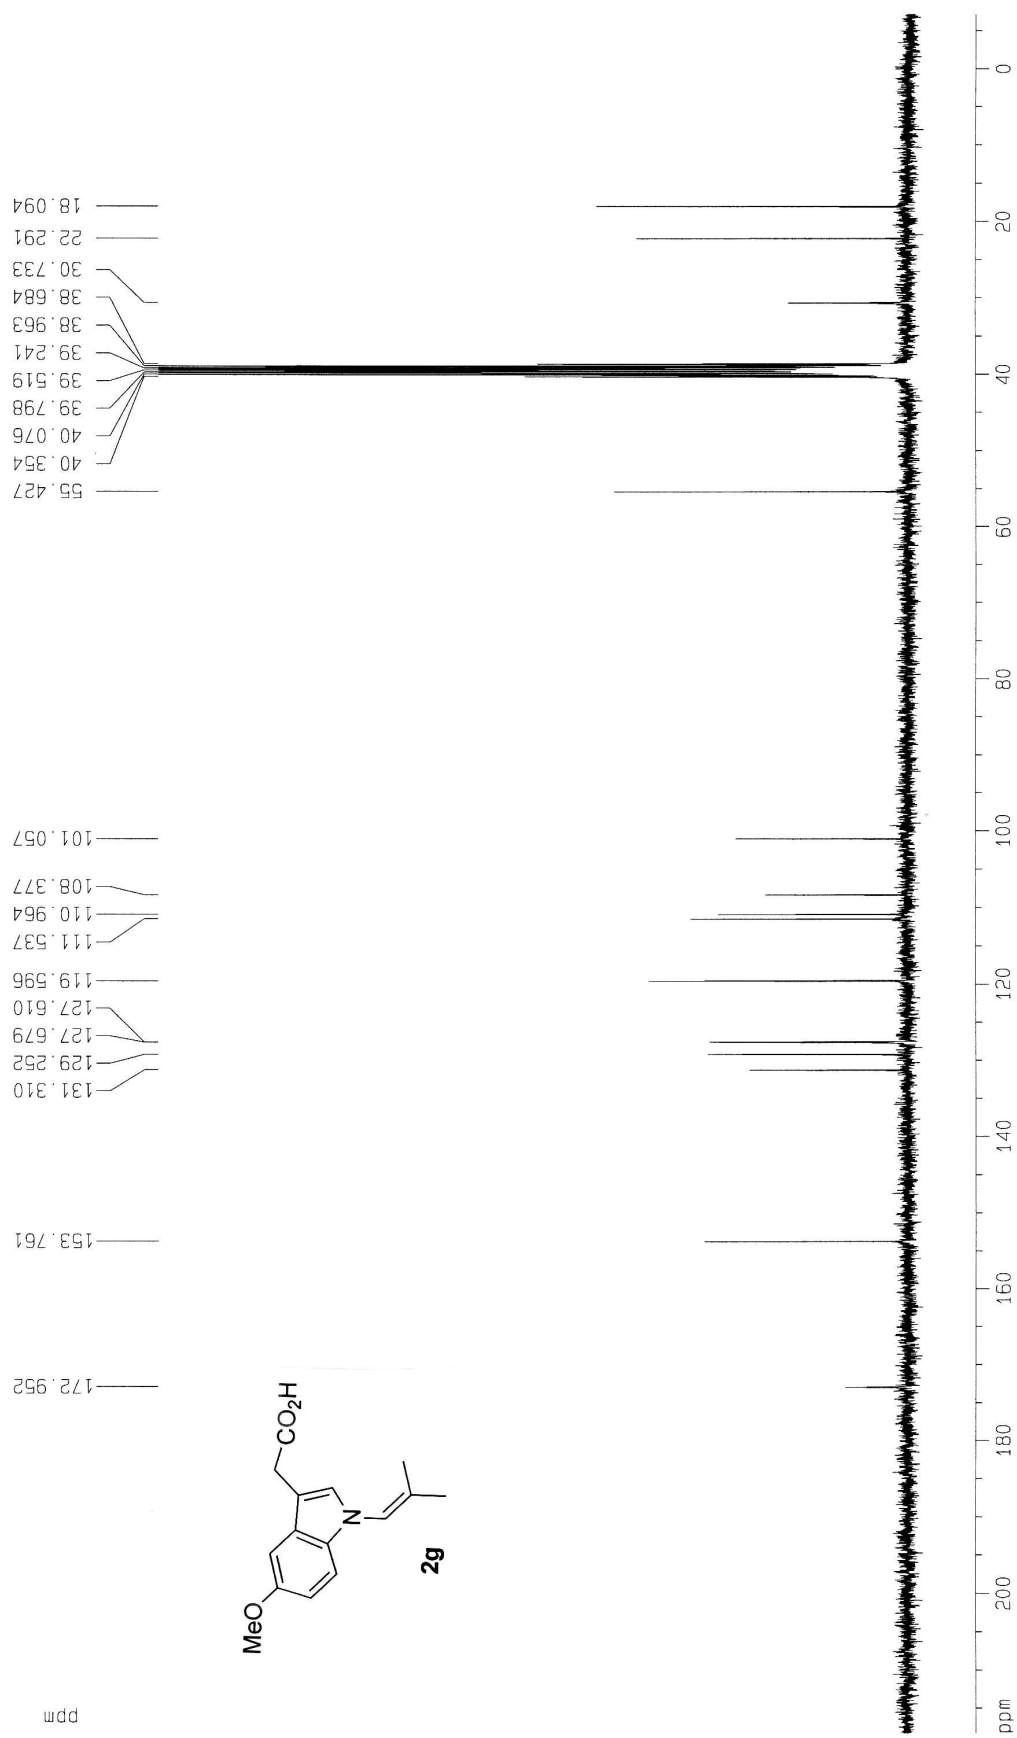

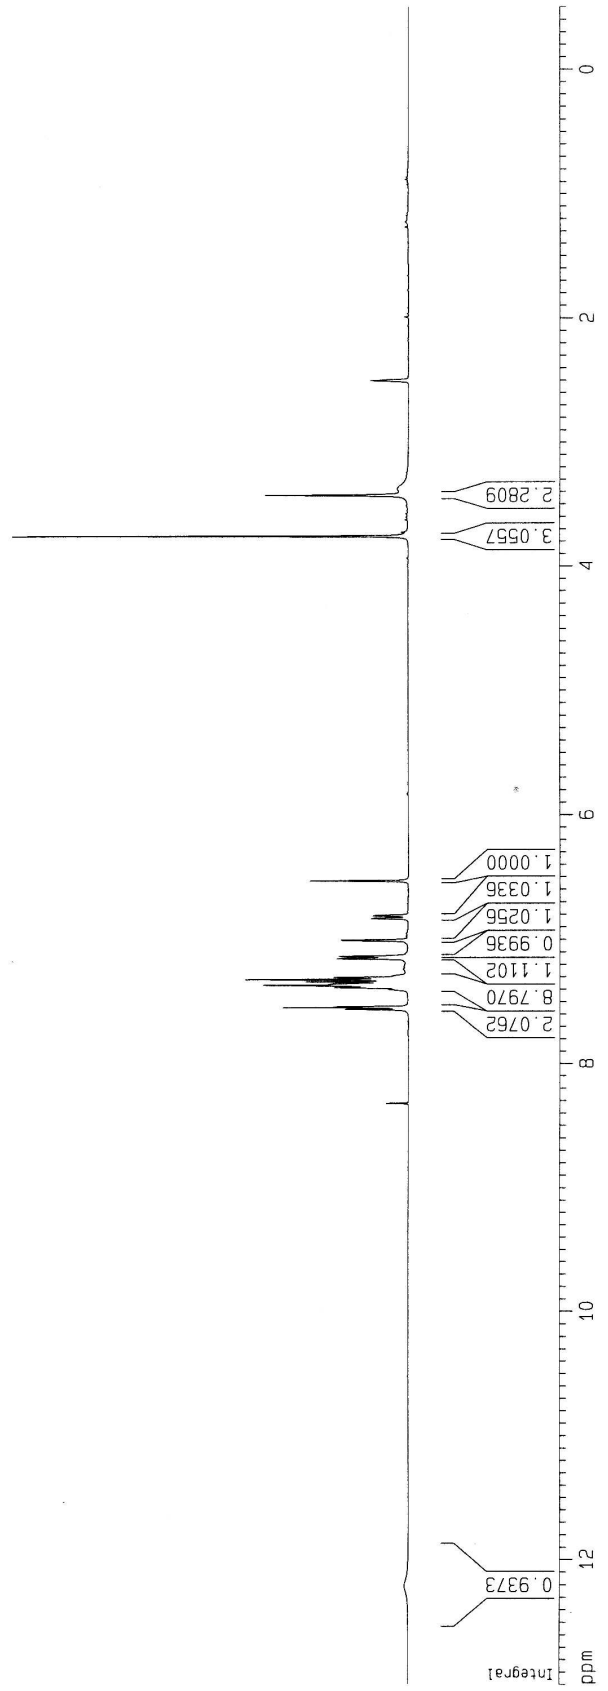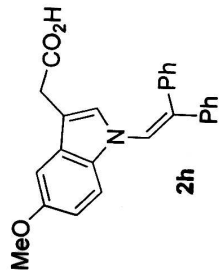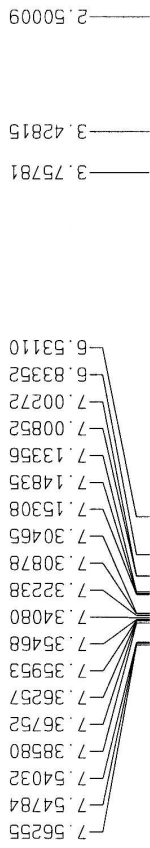

DMSO-*d*<sub>6</sub>, 400MHz

ppm



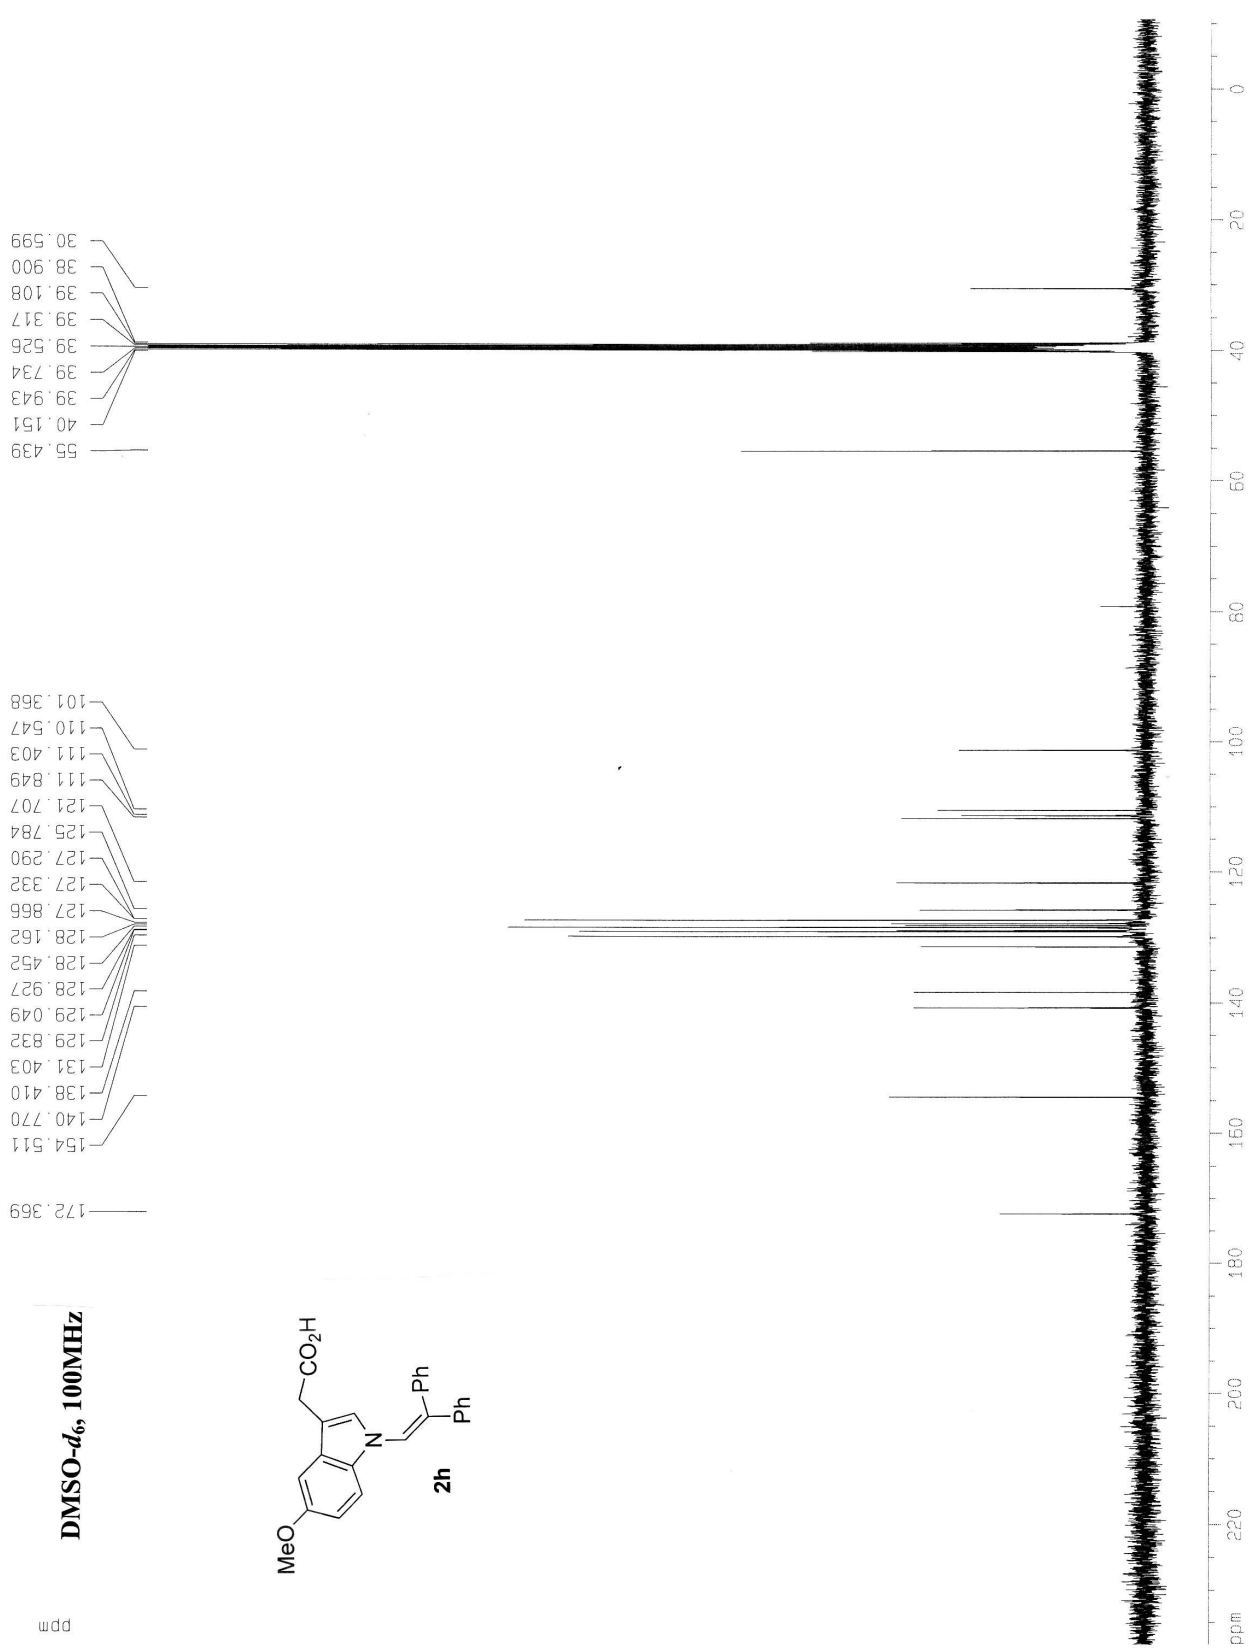

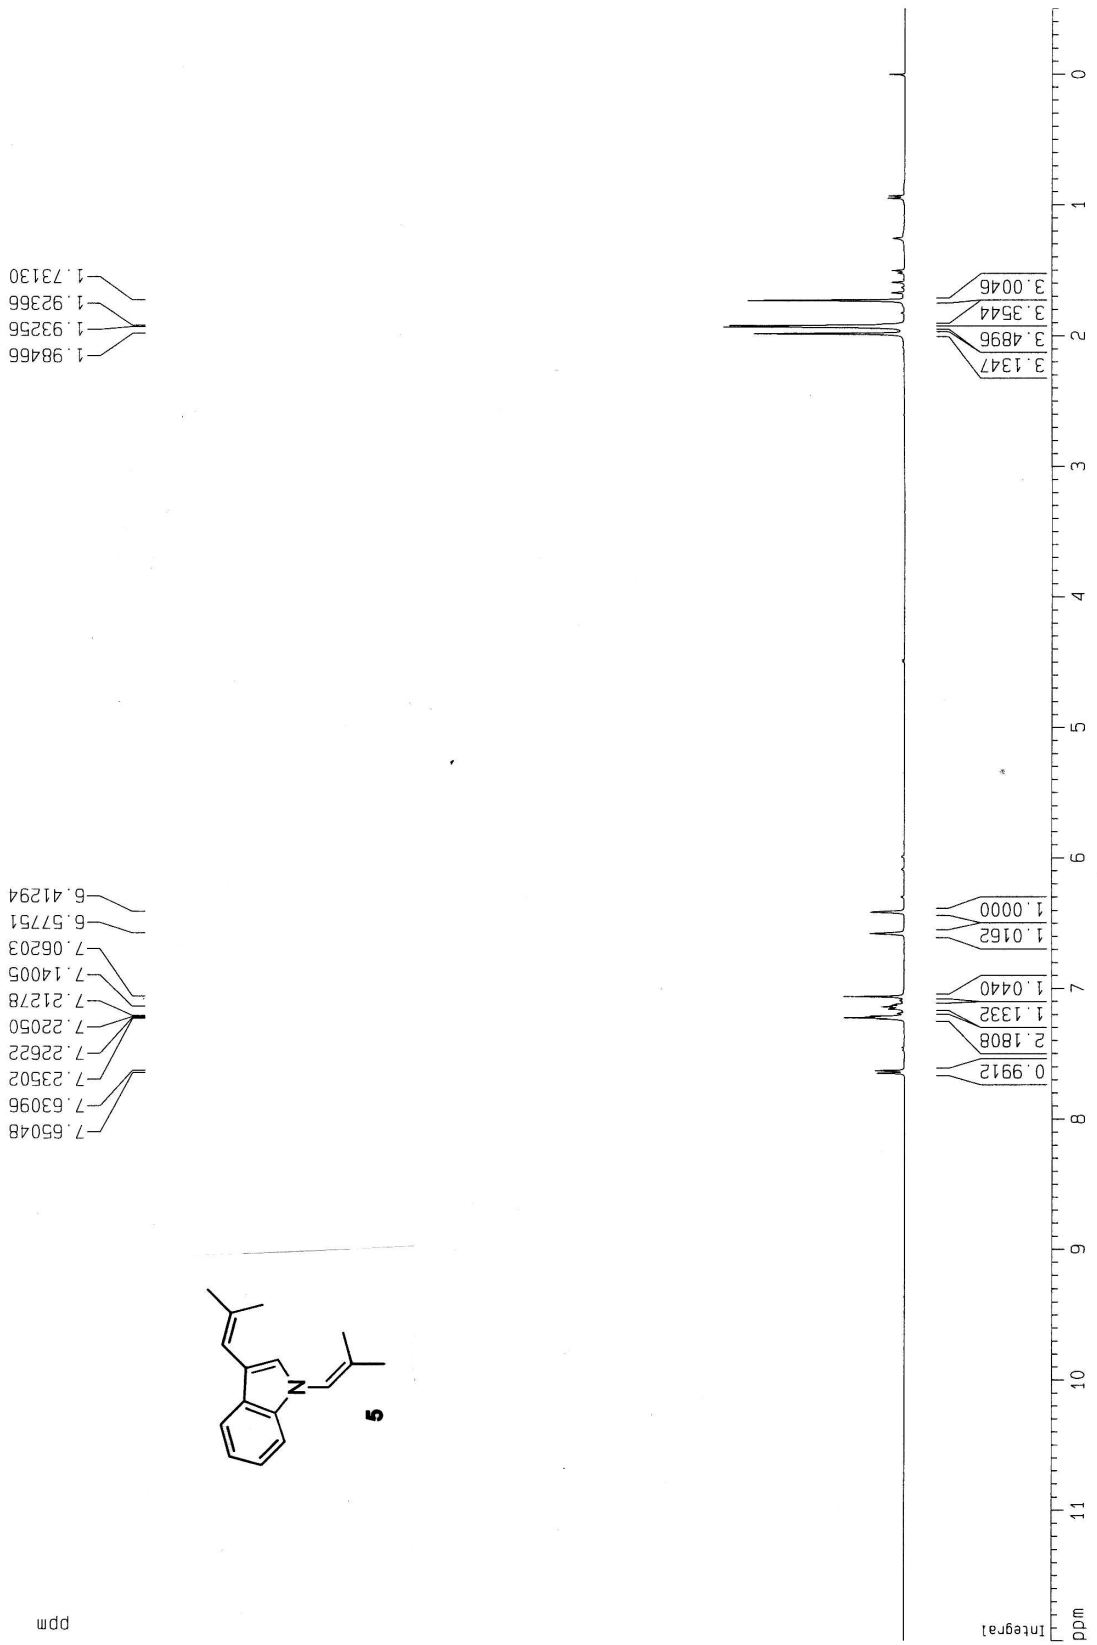

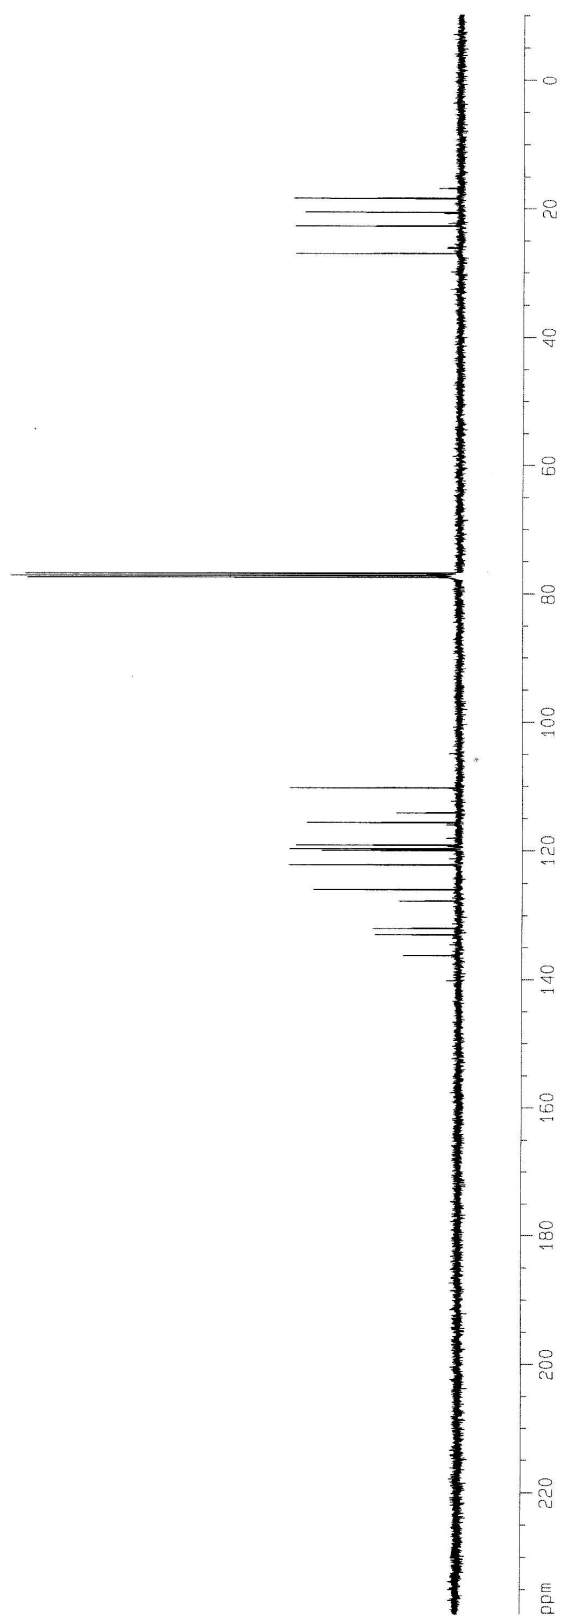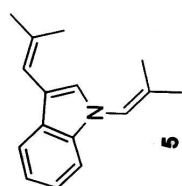

CDCl<sub>3</sub>, 100MHz

ppm

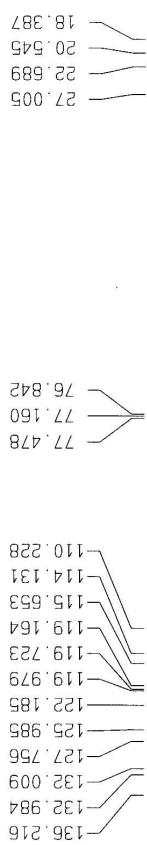

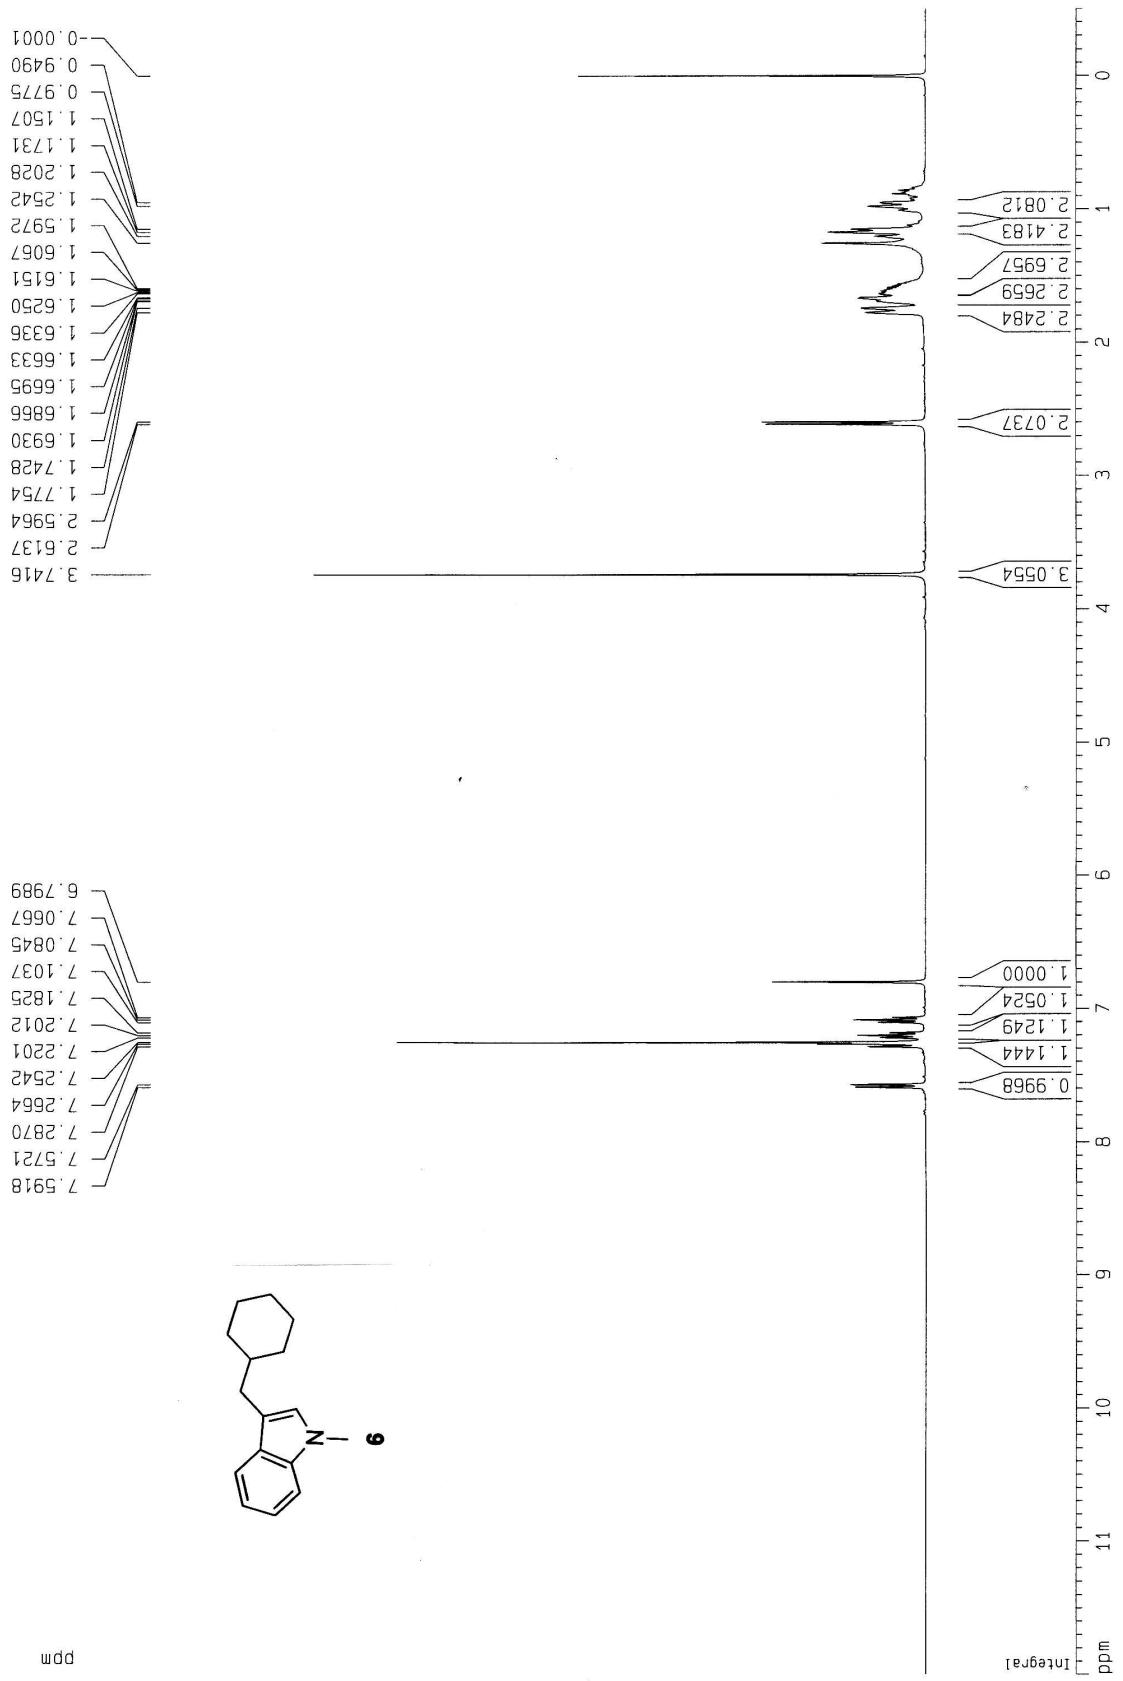

**CDCl<sub>3</sub>, 400MHz**

**CDCl<sub>3</sub>, 75MHz**

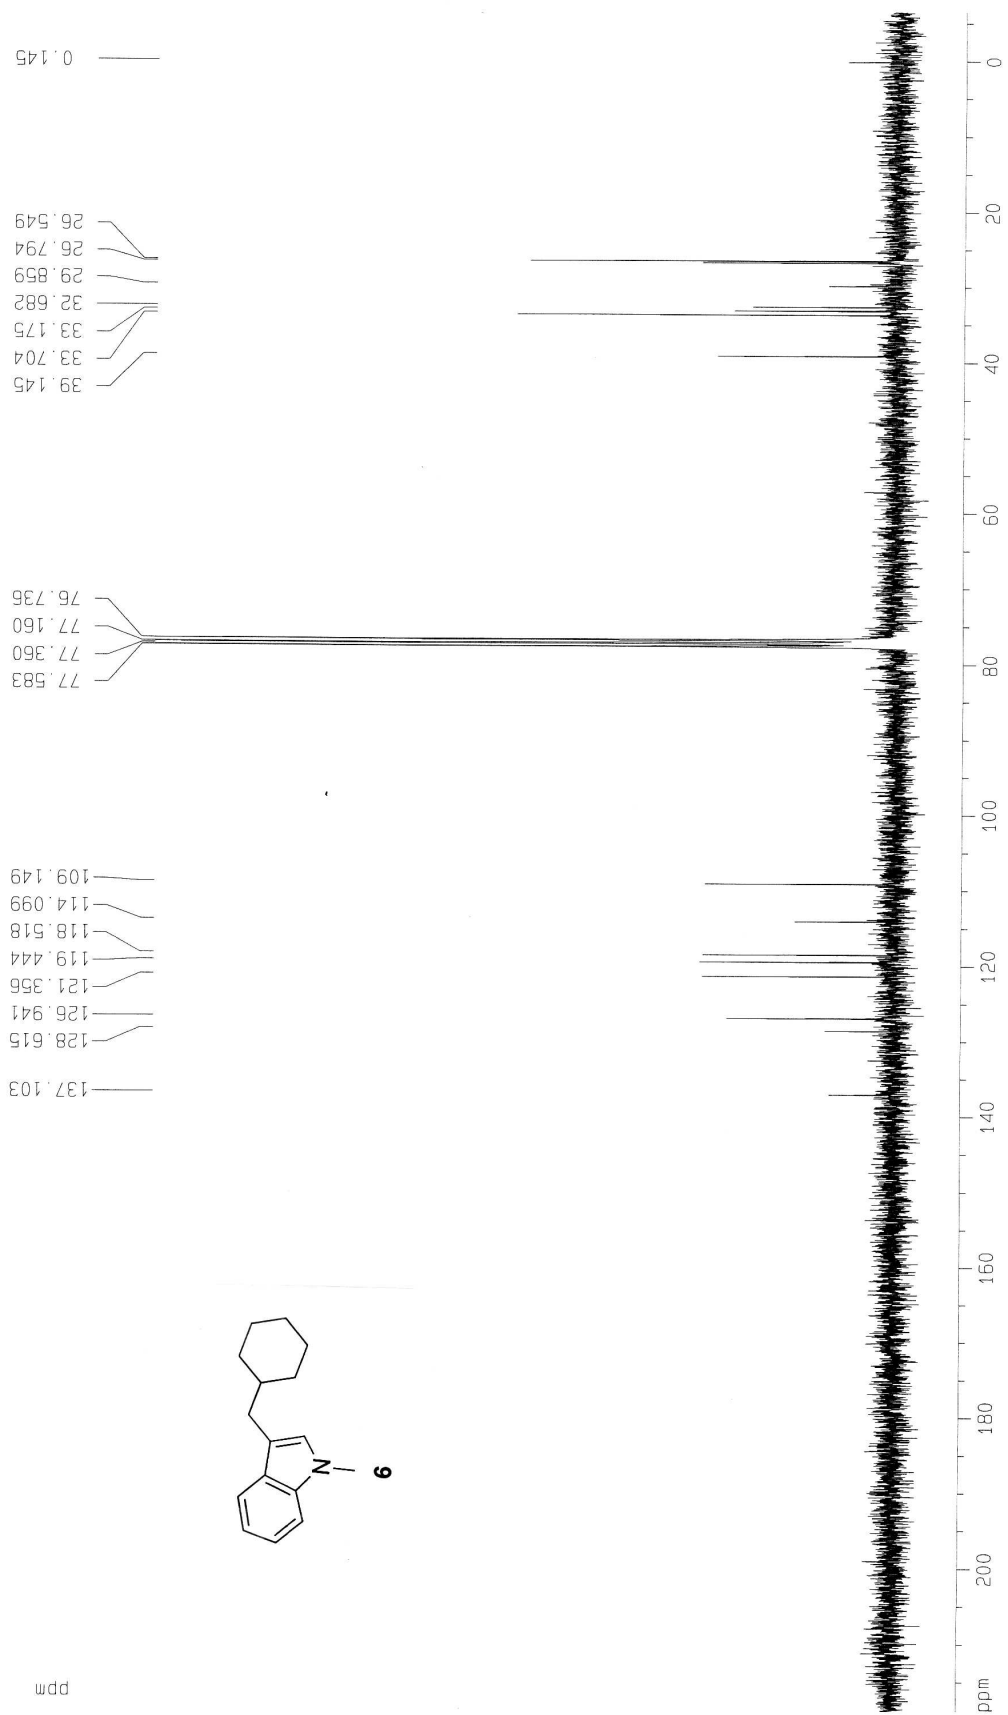

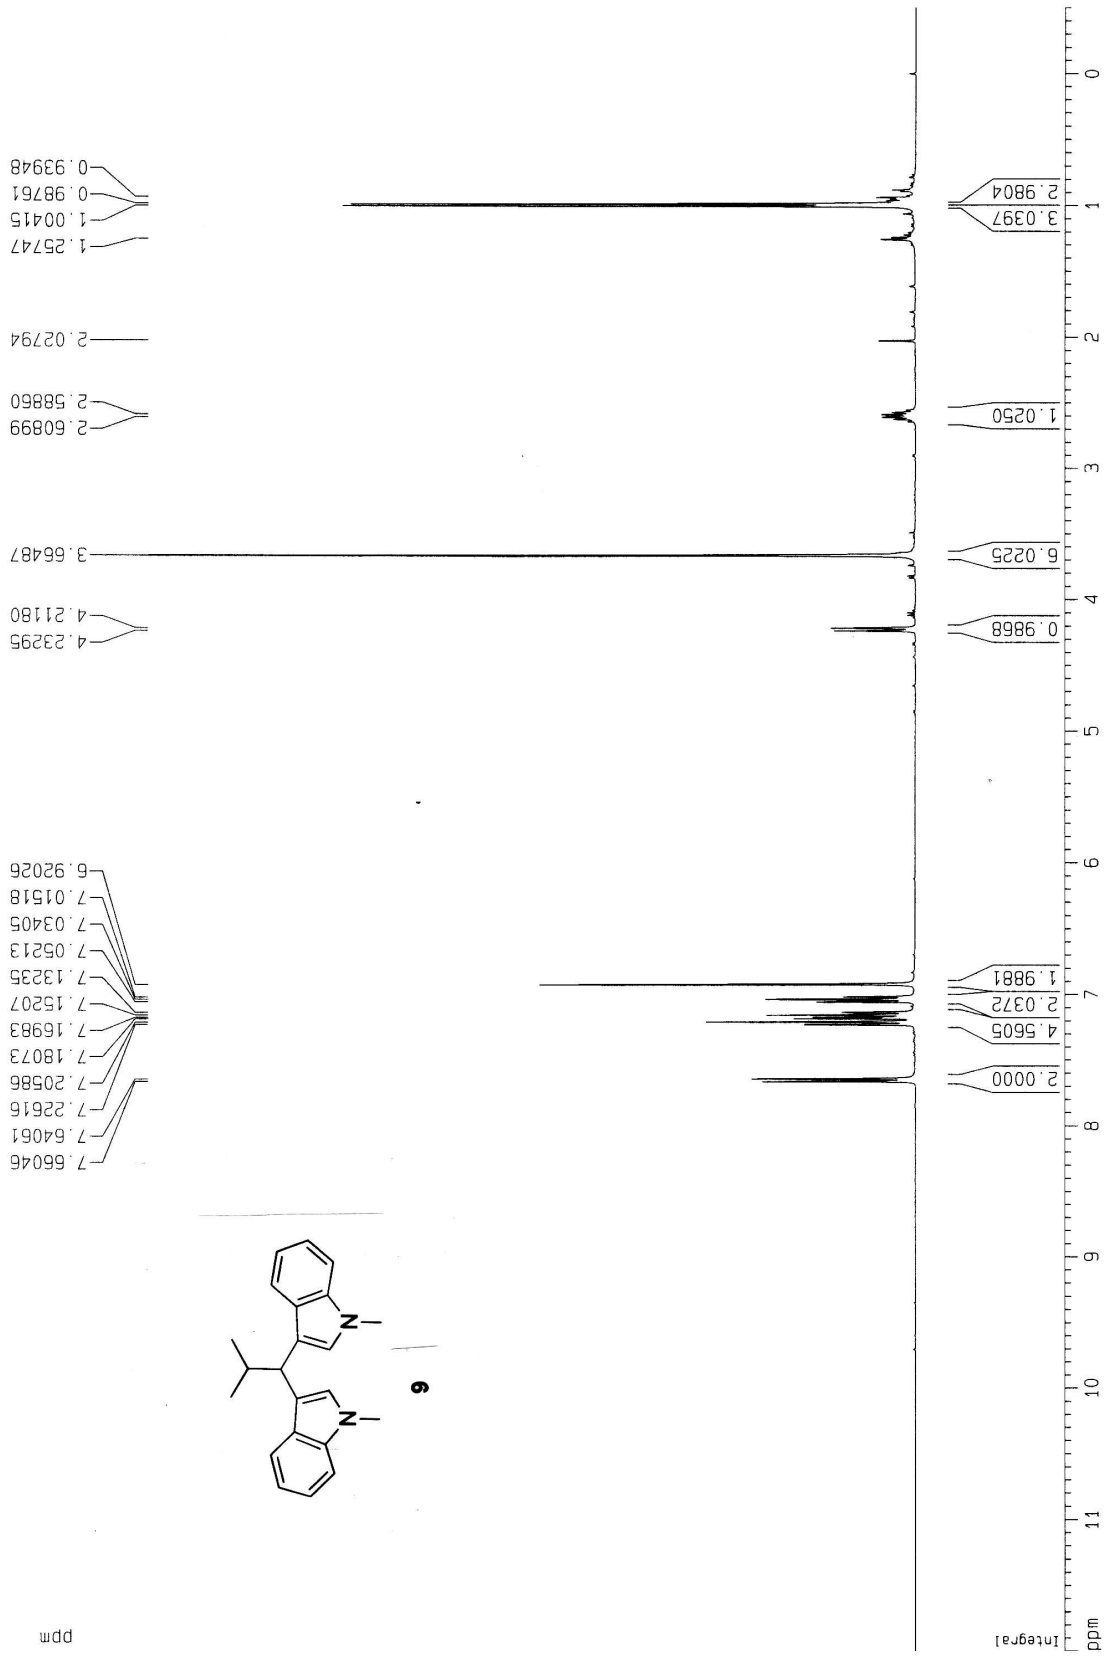

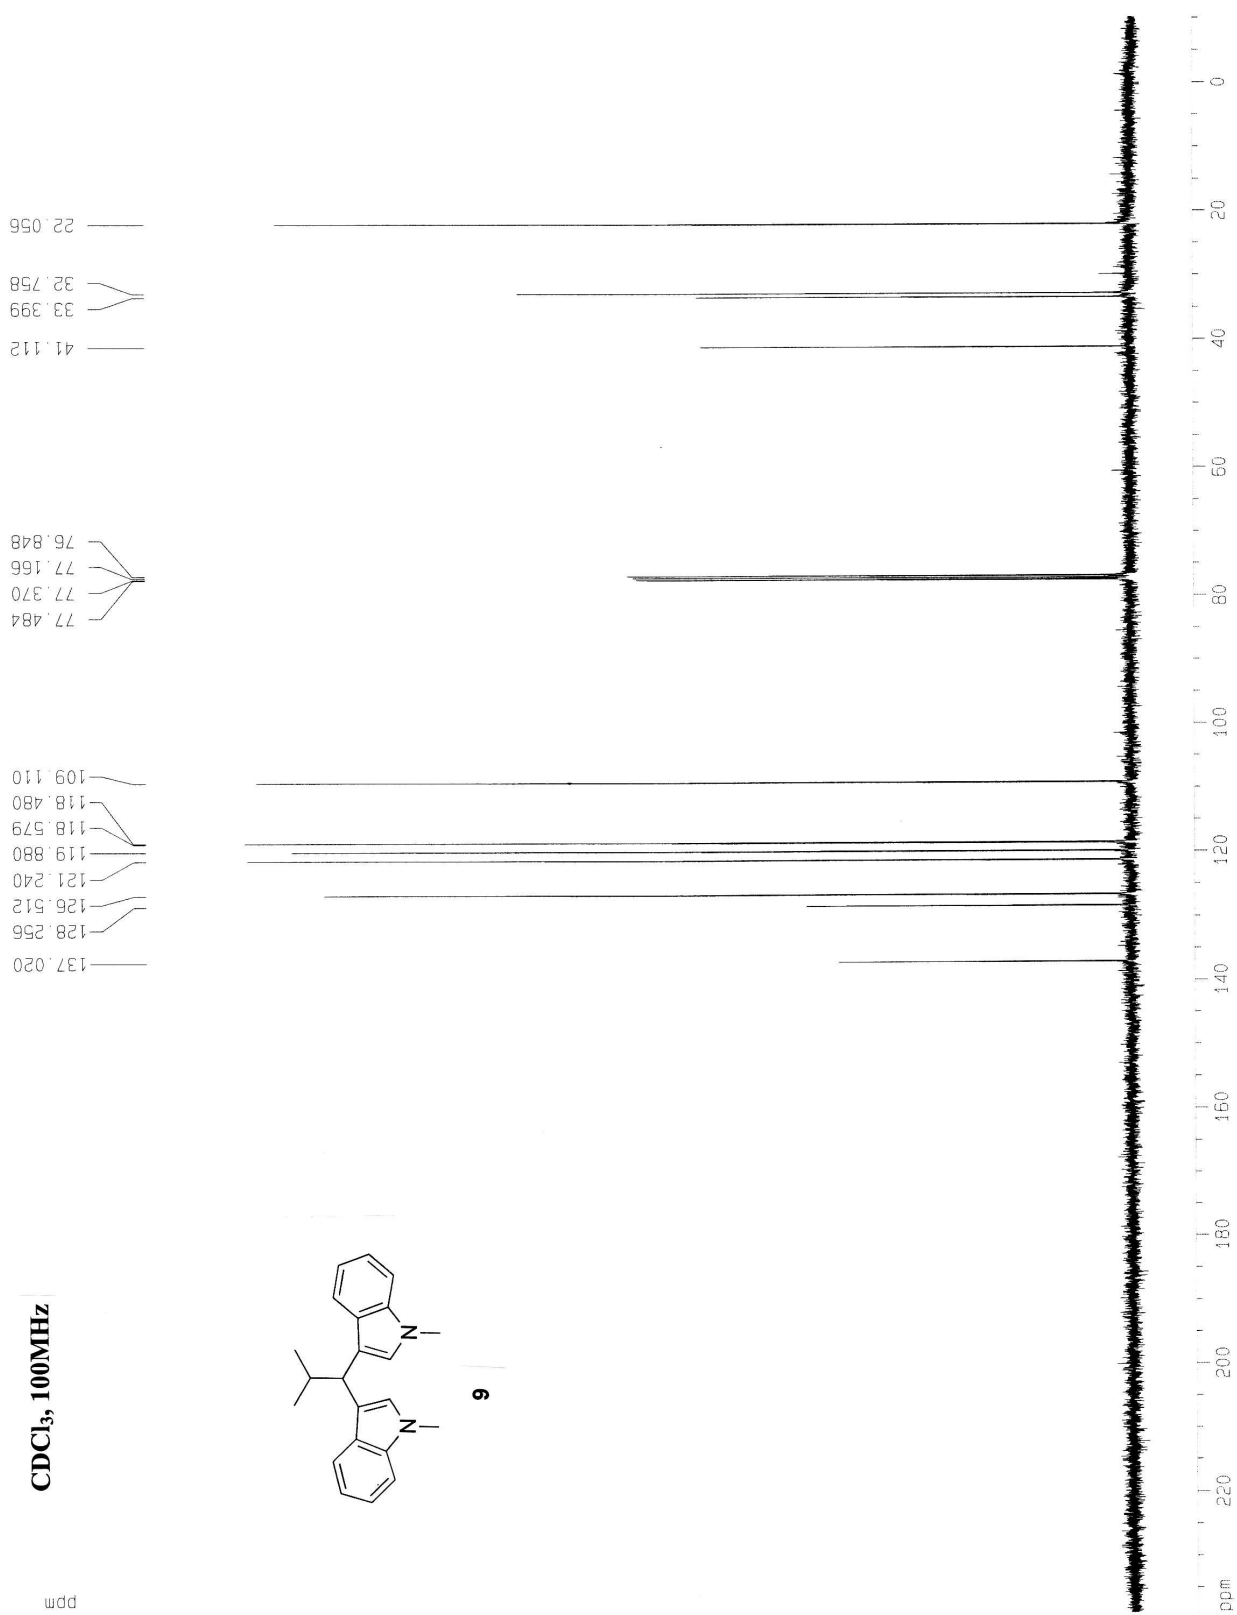

Supplement: Supplementary file 1 [file 4534753]
